# Supplementary material for: Mantle flow below the central and greater Alpine region: insights from SKS anisotropy analysis at AlpArray and permanent stations
Source: Copernicus journal article supplement (doi:10.5194/se-2020-7), 2020-02-19
Supplement: Supplementary file 1 [file se-2020-7-supplement.pdf]

Table 1 Supplementary Material - SKS no null measurements

| DATE (YYYYJJ) | TIME  | Event Lat. | Event Long. | Event depth (km) | Station Lat. | Station Long. | Distance | Azimuth | Back Azimuth | Phi    | dPhi  | Delay Time | d(Delay Time) | Source Polarization | d(Source Polarization) | Station |
|---------------|-------|------------|-------------|------------------|--------------|---------------|----------|---------|--------------|--------|-------|------------|---------------|---------------------|------------------------|---------|
| 2016153       | 23:16 | -2.10      | 100.67      | 50.00            | 47.03        | 7.89          | 93.42    | 316.81  | 89.40        | 43.00  | 17.50 | 1.42       | 0.23          | 91.04               | 0.54                   | A060A   |
| 2016211       | 21:38 | 18.54      | 145.51      | 196.00           | 47.03        | 7.89          | 104.41   | 331.57  | 41.32        | 45.00  | 4.25  | 2.12       | 0.31          | 208.10              | 0.67                   | A060A   |
| 2015328       | 23:05 | -10.54     | -70.94      | 606.00           | 47.10        | 8.93          | 90.83    | 42.27   | 255.49       | 52.00  | 4.50  | 1.45       | 0.14          | 77.49               | 0.91                   | A061A   |
| 2015330       | 06:05 | -9.18      | -71.26      | 602.00           | 47.10        | 8.93          | 90.04    | 42.31   | 256.63       | 66.00  | 4.25  | 2.20       | 0.33          | 80.43               | 0.34                   | A061A   |
| 2015351       | 20:09 | 15.80      | -93.63      | 85.00            | 47.10        | 8.93          | 86.87    | 41.90   | 289.77       | 64.00  | 19.75 | 0.90       | 0.36          | 111.54              | 0.38                   | A061A   |
| 2016139       | 08:17 | 0.43       | -79.79      | 16.00            | 47.10        | 8.93          | 88.81    | 43.09   | 269.35       | 41.00  | 17.75 | 0.80       | 0.24          | 90.19               | 1.11                   | A061A   |
| 2016153       | 23:16 | -2.10      | 100.67      | 50.00            | 47.10        | 8.93          | 92.71    | 316.87  | 90.15        | 62.00  | 2.50  | 1.57       | 0.05          | 94.41               | 0.15                   | A061A   |
| 2016159       | 19:35 | 1.28       | 126.37      | 31.00            | 47.10        | 8.93          | 107.37   | 320.56  | 68.38        | 49.00  | 3.50  | 1.65       | 0.16          | 70.30               | 0.76                   | A061A   |
| 2016211       | 21:38 | 18.54      | 145.51      | 196.00           | 47.10        | 8.93          | 103.89   | 331.07  | 42.20        | 57.00  | 7.75  | 1.60       | 0.40          | 220.40              | 0.56                   | A061A   |
| 2016217       | 14:35 | -22.33     | -66.01      | 270.00           | 47.10        | 8.93          | 96.40    | 41.59   | 244.12       | 56.00  | 3.00  | 2.90       | 0.22          | 70.85               | 0.66                   | A061A   |
| 2016217       | 16:44 | 24.94      | 142.01      | 510.00           | 47.10        | 8.93          | 96.74    | 329.84  | 41.89        | 55.00  | 11.00 | 1.52       | 0.43          | 217.60              | 2.00                   | A061A   |
| 2016283       | 15:06 | 1.77       | 127.45      | 128.00           | 47.10        | 8.93          | 107.68   | 320.95  | 67.18        | 51.00  | 24.50 | 2.40       | 0.63          | 64.02               | 2.74                   | A061A   |
| 2016293       | 00:46 | -4.86      | 108.16      | 614.00           | 47.10        | 8.93          | 99.83    | 316.81  | 86.55        | 27.00  | 22.25 | 1.45       | 0.44          | 77.68               | 2.45                   | A061A   |
| 2016329       | 19:03 | 11.91      | -88.90      | 10.00            | 47.10        | 8.93          | 86.64    | 42.69   | 283.76       | 26.00  | 17.00 | 1.88       | 0.64          | 95.85               | 1.53                   | A061A   |
| 2017010       | 06:33 | 4.48       | 122.62      | 627.00           | 47.10        | 8.93          | 102.54   | 320.14  | 69.27        | 48.00  | 22.00 | 1.77       | 0.61          | 67.65               | 0.48                   | A061A   |
| 2017130       | 23:43 | -56.41     | -25.74      | 15.00            | 47.10        | 8.93          | 107.14   | 23.99   | 199.32       | 80.00  | 13.50 | 1.05       | 0.21          | 206.30              | 0.64                   | A061A   |
| 2017196       | 12:32 | 0.41       | 121.98      | 113.00           | 47.10        | 8.93          | 105.21   | 319.35  | 72.46        | 50.00  | 8.75  | 1.57       | 0.24          | 75.94               | 1.14                   | A061A   |
| 2017223       | 05:48 | 14.01      | 120.74      | 172.00           | 47.10        | 8.93          | 94.06    | 320.52  | 64.61        | 56.00  | 5.50  | 1.92       | 0.34          | 72.51               | 0.32                   | A061A   |
| 2017283       | 06:52 | -18.57     | -69.75      | 85.00            | 47.10        | 8.93          | 95.96    | 42.34   | 249.26       | 52.00  | 9.00  | 1.40       | 0.39          | 70.63               | 0.91                   | A061A   |
| 2018014       | 09:38 | -15.77     | -74.71      | 39.00            | 47.10        | 8.93          | 97.14    | 43.18   | 254.66       | 47.00  | 6.50  | 1.12       | 0.14          | 75.80               | 0.19                   | A061A   |
| 2018084       | 20:34 | -6.63      | 129.82      | 169.00           | 47.10        | 8.93          | 115.61   | 319.45  | 70.96        | 58.00  | 5.00  | 1.90       | 0.17          | 80.61               | 0.65                   | A061A   |
| 2018092       | 14:00 | -20.66     | -63.01      | 559.00           | 47.10        | 8.93          | 93.31    | 40.59   | 243.10       | 46.00  | 4.25  | 1.52       | 0.23          | 63.66               | 0.94                   | A061A   |
| 2018181       | 04:16 | 19.02      | -105.12     | 15.00            | 47.10        | 8.93          | 91.54    | 38.62   | 300.20       | 46.00  | 8.50  | 1.07       | 0.25          | 115.89              | 0.42                   | A061A   |
| 2018217       | 12:06 | -8.26      | 116.44      | 34.00            | 47.10        | 8.93          | 107.92   | 316.78  | 82.75        | 65.00  | 20.25 | 1.27       | 0.59          | 84.16               | 3.67                   | A061A   |
| 2018231       | 15:16 | -8.32      | 116.63      | 21.00            | 47.10        | 8.93          | 108.09   | 316.79  | 82.65        | 66.00  | 5.00  | 3.17       | 0.55          | 81.73               | 1.32                   | A061A   |
| 2018236       | 09:24 | -11.04     | -70.83      | 630.00           | 47.10        | 8.93          | 91.13    | 42.25   | 255.08       | 49.00  | 9.25  | 1.57       | 0.24          | 77.03               | 0.40                   | A061A   |
| 2018250       | 02:32 | -2.35      | -78.90      | 93.00            | 47.10        | 8.93          | 90.22    | 43.06   | 266.82       | 44.00  | 5.75  | 1.23       | 0.06          | 88.27               | 0.16                   | A061A   |
| 2018251       | 07:36 | 7.24       | 126.48      | 10.00            | 47.10        | 8.93          | 102.83   | 321.59  | 64.44        | 60.00  | 4.75  | 2.42       | 0.27          | 75.84               | 0.47                   | A061A   |
| 2018271       | 10:22 | -0.18      | 119.84      | 10.00            | 47.10        | 8.93          | 104.25   | 318.82  | 74.53        | 54.00  | 4.50  | 1.97       | 0.19          | 78.48               | 0.39                   | A061A   |
| 2016157       | 16:45 | -4.59      | 125.63      | 429.00           | 46.18        | 9.11          | 111.49   | 318.07  | 73.46        | 53.00  | 28.75 | 1.57       | 0.77          | 66.24               | 2.49                   | A062A   |
| 2017243       | 17:26 | -1.16      | 99.69       | 43.00            | 46.18        | 9.11          | 91.23    | 315.98  | 90.39        | 63.00  | 20.25 | 2.42       | 0.59          | 87.30               | 3.43                   | A062A   |
| 2018240       | 22:55 | 16.80      | 146.84      | 55.00            | 46.18        | 9.11          | 106.61   | 330.81  | 42.25        | 74.00  | 6.25  | 0.95       | 0.07          | 215.47              | 0.82                   | A062A   |
| 2015259       | 08:00 | 1.88       | 126.43      | 41.00            | 45.62        | 8.36          | 107.87   | 319.41  | 67.91        | 44.00  | 3.50  | 3.30       | 0.19          | 59.44               | 1.31                   | A287A   |
| 2016153       | 23:16 | -2.10      | 100.67      | 50.00            | 45.62        | 8.36          | 93.11    | 315.39  | 89.82        | 65.00  | 16.25 | 1.32       | 0.36          | 93.27               | 2.27                   | A287A   |
| 2016217       | 16:44 | 24.94      | 142.01      | 510.00           | 45.62        | 8.36          | 98.11    | 329.14  | 41.57        | 63.00  | 23.00 | 0.40       | 0.32          | 217.37              | 1.32                   | A287A   |
| 2016238       | 17:24 | 30.61      | 137.85      | 456.00           | 45.62        | 8.36          | 91.36    | 327.20  | 41.72        | 52.00  | 18.50 | 0.62       | 0.26          | 213.21              | 1.00                   | A287A   |
| 2016211       | 21:38 | 18.54      | 145.51      | 196.00           | 46.01        | 8.48          | 104.90   | 330.55  | 42.01        | 45.00  | 2.50  | 3.20       | 0.37          | 215.74              | 0.49                   | A288A   |
| 2016217       | 16:44 | 24.94      | 142.01      | 510.00           | 46.01        | 8.48          | 97.76    | 329.34  | 41.63        | 49.00  | 4.50  | 2.47       | 0.28          | 214.11              | 1.31                   | A288A   |
| 2017132       | 11:01 | 12.92      | -90.06      | 16.00            | 46.01        | 8.48          | 86.65    | 43.66   | 285.02       | -81.00 | 6.25  | 2.35       | 0.61          | 294.53              | 1.44                   | A288A   |
| 2018181       | 04:16 | 19.02      | -105.12     | 15.00            | 46.01        | 8.48          | 91.82    | 39.72   | 299.85       | -68.00 | 5.00  | 1.92       | 0.39          | 306.84              | 1.48                   | A288A   |
| 2018250       | 02:32 | -2.35      | -78.90      | 93.00            | 46.01        | 8.48          | 89.85    | 44.13   | 266.50       | 63.00  | 7.50  | 1.07       | 0.16          | 90.56               | 0.27                   | A288A   |
| 2016139       | 08:17 | 0.43       | -79.79      | 16.00            | 46.05        | 9.76          | 89.38    | 44.15   | 269.98       | 75.00  | 3.50  | 1.70       | 0.29          | 85.12               | 0.65                   | A289A   |
| 2016153       | 23:16 | -2.10      | 100.67      | 50.00            | 46.05        | 9.76          | 92.13    | 315.82  | 90.80        | 58.00  | 7.00  | 2.40       | 0.21          | 89.23               | 1.97                   | A289A   |
| 2016211       | 21:38 | 18.54      | 145.51      | 196.00           | 46.05        | 9.76          | 104.27   | 329.90  | 43.09        | 80.00  | 20.25 | 0.75       | 0.41          | 221.43              | 0.87                   | A289A   |
| 2016217       | 14:35 | -22.33     | -66.01      | 270.00           | 46.05        | 9.76          | 96.46    | 42.80   | 244.59       | 72.00  | 22.25 | 1.02       | 0.66          | 235.66              | 0.74                   | A289A   |
| 2016217       | 16:44 | 24.94      | 142.01      | 510.00           | 46.05        | 9.76          | 97.13    | 328.70  | 42.63        | 76.00  | 8.50  | 0.97       | 0.10          | 217.86              | 0.59                   | A289A   |

| DATE (YYYYJJ) | TIME  | Event Lat. | Event Long. | Event depth (km) | Station Lat. | Station Long. | Distance | Azimuth | Back Azimuth | Phi    | dPhi  | Delay Time | d(Delay Time) | Source Polarization | d(Source Polarization) | Station |
|---------------|-------|------------|-------------|------------------|--------------|---------------|----------|---------|--------------|--------|-------|------------|---------------|---------------------|------------------------|---------|
| 2016238       | 17:24 | 30.61      | 137.85      | 456.00           | 46.05        | 9.76          | 90.39    | 326.76  | 42.73        | 89.00  | 11.00 | 0.97       | 0.12          | 223.08              | 1.03                   | A289A   |
| 2016309       | 16:40 | -35.09     | -71.05      | 90.00            | 46.05        | 9.76          | 108.63   | 46.52   | 238.68       | -39.00 | 25.75 | 2.15       | 0.77          | 63.65               | 2.13                   | A289A   |
| 2017243       | 17:26 | -1.16      | 99.69       | 43.00            | 46.05        | 9.76          | 90.78    | 315.85  | 90.85        | 58.00  | 9.00  | 1.85       | 0.26          | 85.88               | 0.78                   | A289A   |
| 2018092       | 14:00 | -20.66     | -63.01      | 559.00           | 46.05        | 9.76          | 93.35    | 41.79   | 243.63       | 89.00  | 17.00 | 0.80       | 0.26          | 234.79              | 1.58                   | A289A   |
| 2016113       | 03:40 | -0.28      | -80.50      | 10.00            | 46.51        | 10.90         | 91.17    | 43.68   | 270.82       | 72.00  | 6.50  | 2.42       | 0.66          | 88.22               | 1.49                   | A290A   |
| 2016139       | 08:17 | 0.43       | -79.79      | 16.00            | 46.51        | 10.90         | 90.17    | 43.68   | 270.80       | 56.00  | 6.25  | 1.38       | 0.23          | 79.24               | 1.35                   | A290A   |
| 2016139       | 17:06 | 0.49       | -79.62      | 29.00            | 46.51        | 10.90         | 90.01    | 43.68   | 270.71       | 62.00  | 10.00 | 1.25       | 0.39          | 79.77               | 0.88                   | A290A   |
| 2016153       | 23:16 | -2.10      | 100.67      | 50.00            | 46.51        | 10.90         | 91.35    | 316.30  | 91.61        | 43.00  | 8.25  | 1.97       | 0.21          | 96.29               | 0.45                   | A290A   |
| 2016159       | 19:35 | 1.28       | 126.37      | 31.00            | 46.51        | 10.90         | 106.31   | 319.48  | 70.13        | 22.00  | 11.00 | 1.70       | 0.23          | 70.20               | 1.26                   | A290A   |
| 2016217       | 14:35 | -22.33     | -66.01      | 270.00           | 46.51        | 10.90         | 97.38    | 42.72   | 245.42       | 47.00  | 16.50 | 2.27       | 0.92          | 57.09               | 1.64                   | A290A   |
| 2017049       | 12:30 | -23.86     | -66.66      | 222.00           | 46.51        | 10.90         | 98.90    | 43.06   | 244.82       | 43.00  | 6.25  | 1.57       | 0.29          | 61.87               | 1.05                   | A290A   |
| 2017181       | 22:49 | -0.28      | -80.49      | 13.00            | 46.51        | 10.90         | 91.16    | 43.68   | 270.82       | 64.00  | 19.25 | 1.12       | 0.57          | 78.01               | 0.84                   | A290A   |
| 2015135       | 20:46 | -2.54      | 102.22      | 151.00           | 46.73        | 11.32         | 92.45    | 316.49  | 91.08        | 61.00  | 9.75  | 1.35       | 0.11          | 104.40              | 1.88                   | ABSI    |
| 2015150       | 19:09 | 30.79      | 142.97      | 6.00             | 46.73        | 11.32         | 91.36    | 329.06  | 40.03        | 54.00  | 4.00  | 2.10       | 0.25          | 214.94              | 0.69                   | ABSI    |
| 2015155       | 23:35 | 5.99       | 116.54      | 10.00            | 46.73        | 11.32         | 95.99    | 318.13  | 74.80        | 49.00  | 3.75  | 1.90       | 0.12          | 79.10               | 0.43                   | ABSI    |
| 2015174       | 12:38 | 27.74      | 139.73      | 460.00           | 46.73        | 11.32         | 92.45    | 327.35  | 44.04        | 66.00  | 6.75  | 2.12       | 0.56          | 231.05              | 1.76                   | ABSI    |
| 2015184       | 07:03 | 10.17      | 125.89      | 32.00            | 46.73        | 11.32         | 98.87    | 320.71  | 64.99        | 45.00  | 7.25  | 1.62       | 0.34          | 61.52               | 0.64                   | ABSI    |
| 2015232       | 11:20 | 0.49       | 126.59      | 46.00            | 46.73        | 11.32         | 106.71   | 319.50  | 70.76        | 39.00  | 6.50  | 1.23       | 0.16          | 64.72               | 1.37                   | ABSI    |
| 2015244       | 15:45 | 31.18      | 141.60      | 8.00             | 46.73        | 11.32         | 90.42    | 328.34  | 40.83        | 68.00  | 4.00  | 2.02       | 0.16          | 221.02              | 0.33                   | ABSI    |
| 2015259       | 08:00 | 1.88       | 126.43      | 41.00            | 46.73        | 11.32         | 105.55   | 319.72  | 69.95        | 41.00  | 11.50 | 1.25       | 0.25          | 69.08               | 0.94                   | ABSI    |
| 2015351       | 20:09 | 15.80      | -93.63      | 85.00            | 46.73        | 11.32         | 88.54    | 41.67   | 291.50       | 67.00  | 23.75 | 1.05       | 0.54          | 97.91               | 2.01                   | ABSI    |
| 2016139       | 08:17 | 0.43       | -79.79      | 16.00            | 46.73        | 11.32         | 90.45    | 43.46   | 271.10       | 66.00  | 2.50  | 1.85       | 0.14          | 82.25               | 0.37                   | ABSI    |
| 2016153       | 23:16 | -2.10      | 100.67      | 50.00            | 46.73        | 11.32         | 91.07    | 316.53  | 91.91        | 56.00  | 4.50  | 1.55       | 0.07          | 94.98               | 0.94                   | ABSI    |
| 2016159       | 19:35 | 1.28       | 126.37      | 31.00            | 46.73        | 11.32         | 105.97   | 319.59  | 70.40        | 41.00  | 5.50  | 1.40       | 0.17          | 67.41               | 0.81                   | ABSI    |
| 2016139       | 08:17 | 0.43       | -79.79      | 16.00            | 46.50        | 11.32         | 90.46    | 43.69   | 271.10       | 73.00  | 25.25 | 1.35       | 0.70          | 91.45               | 2.02                   | BOSI    |
| 2016153       | 23:16 | -2.10      | 100.67      | 50.00            | 46.50        | 11.32         | 91.06    | 316.30  | 91.91        | 48.00  | 4.00  | 1.40       | 0.06          | 98.91               | 0.57                   | BOSI    |
| 2017010       | 06:33 | 4.48       | 122.62      | 627.00           | 46.50        | 11.32         | 101.19   | 318.99  | 71.24        | 52.00  | 11.75 | 1.38       | 0.33          | 81.10               | 4.42                   | BOSI    |
| 2018250       | 02:32 | -2.35      | -78.90      | 93.00            | 46.50        | 11.32         | 91.84    | 43.72   | 268.54       | 69.00  | 2.75  | 1.30       | 0.14          | 86.86               | 0.20                   | BOSI    |
| 2015155       | 23:35 | 5.99       | 116.54      | 10.00            | 46.46        | 11.38         | 96.02    | 317.86  | 74.87        | 55.00  | 9.00  | 1.65       | 0.39          | 76.71               | 2.60                   | KOSI    |
| 2015232       | 11:20 | 0.49       | 126.59      | 46.00            | 46.46        | 11.38         | 106.76   | 319.22  | 70.88        | 50.00  | 6.00  | 1.52       | 0.15          | 75.92               | 1.94                   | KOSI    |
| 2016139       | 08:17 | 0.43       | -79.79      | 16.00            | 46.46        | 11.38         | 90.50    | 43.72   | 271.14       | 75.00  | 7.00  | 1.82       | 0.42          | 92.52               | 0.26                   | KOSI    |
| 2016153       | 23:16 | -2.10      | 100.67      | 50.00            | 46.46        | 11.38         | 91.02    | 316.27  | 91.95        | 65.00  | 10.75 | 1.32       | 0.16          | 101.17              | 1.56                   | KOSI    |
| 2016217       | 16:44 | 24.94      | 142.01      | 510.00           | 46.46        | 11.38         | 96.06    | 328.16  | 43.85        | 58.00  | 5.00  | 2.17       | 0.24          | 221.72              | 1.16                   | KOSI    |
| 2016293       | 00:46 | -4.86      | 108.16      | 614.00           | 46.46        | 11.38         | 98.17    | 316.10  | 88.45        | 47.00  | 12.00 | 1.97       | 0.24          | 83.27               | 4.86                   | KOSI    |
| 2017010       | 06:33 | 4.48       | 122.62      | 627.00           | 46.46        | 11.38         | 101.16   | 318.95  | 71.29        | 37.00  | 5.25  | 1.62       | 0.15          | 69.43               | 1.17                   | KOSI    |
| 2018250       | 02:32 | -2.35      | -78.90      | 93.00            | 46.46        | 11.38         | 91.88    | 43.76   | 268.59       | 70.00  | 7.00  | 1.40       | 0.29          | 89.77               | 0.40                   | KOSI    |
| 2018271       | 10:22 | -0.18      | 119.84      | 10.00            | 46.46        | 11.38         | 102.78   | 317.75  | 76.56        | 39.00  | 15.75 | 1.55       | 0.27          | 78.42               | 0.66                   | KOSI    |
| 2015244       | 15:45 | 31.18      | 141.60      | 8.00             | 45.96        | 10.94         | 91.17    | 328.04  | 40.57        | 60.00  | 7.25  | 2.20       | 0.37          | 214.13              | 1.62                   | LUSI    |
| 2015259       | 08:00 | 1.88       | 126.43      | 41.00            | 45.96        | 10.94         | 106.06   | 319.06  | 69.86        | 61.00  | 3.75  | 2.62       | 0.41          | 71.90               | 0.95                   | LUSI    |
| 2015351       | 20:08 | 15.80      | -93.63      | 85.00            | 45.96        | 10.94         | 88.57    | 42.48   | 291.25       | -80.00 | 20.50 | 1.55       | 0.54          | 302.16              | 0.98                   | LUSI    |
| 2016139       | 08:17 | 0.43       | -79.79      | 16.00            | 45.96        | 10.94         | 90.21    | 44.23   | 270.82       | 54.00  | 9.50  | 1.15       | 0.14          | 100.70              | 1.20                   | LUSI    |
| 2016153       | 23:16 | -2.10      | 100.67      | 50.00            | 45.96        | 10.94         | 91.30    | 315.75  | 91.65        | 66.00  | 1.75  | 1.60       | 0.04          | 96.20               | 0.25                   | LUSI    |
| 2016159       | 11:11 | 18.36      | -105.17     | 10.00            | 45.96        | 10.94         | 93.86    | 38.89   | 301.27       | -72.00 | 9.50  | 1.15       | 0.25          | 311.82              | 0.43                   | LUSI    |
| 2016211       | 21:38 | 18.54      | 145.51      | 196.00           | 45.96        | 10.94         | 103.77   | 329.22  | 44.10        | 61.00  | 5.00  | 1.88       | 0.22          | 217.43              | 0.85                   | LUSI    |
| 2016217       | 16:44 | 24.94      | 142.01      | 510.00           | 45.96        | 10.94         | 96.64    | 328.03  | 43.56        | 67.00  | 13.00 | 1.55       | 0.30          | 217.57              | 1.49                   | LUSI    |
| 2016238       | 17:24 | 30.61      | 137.85      | 456.00           | 45.96        | 10.94         | 89.89    | 326.10  | 43.58        | 69.00  | 5.50  | 1.67       | 0.16          | 221.91              | 1.03                   | LUSI    |
| 2016329       | 19:03 | 11.91      | -88.90      | 10.00            | 45.96        | 10.94         | 88.27    | 43.44   | 285.25       | 74.00  | 13.00 | 0.97       | 0.19          | 112.22              | 0.20                   | LUSI    |

| DATE (YYYYJJ) | TIME  | Event Lat. | Event Long. | Event depth (km) | Station Lat. | Station Long. | Distance | Azimuth | Back Azimuth | Phi    | dPhi  | Delay Time | d(Delay Time) | Source Polarization | d(Source Polarization) | Station |
|---------------|-------|------------|-------------|------------------|--------------|---------------|----------|---------|--------------|--------|-------|------------|---------------|---------------------|------------------------|---------|
| 2017010       | 06:33 | 4.48       | 122.62      | 627.00           | 45.96        | 10.94         | 101.61   | 318.56  | 71.06        | 50.00  | 7.25  | 1.67       | 0.39          | 69.24               | 1.02                   | LUSI    |
| 2017243       | 17:26 | -1.16      | 99.69       | 43.00            | 45.96        | 10.94         | 89.95    | 315.78  | 91.70        | 56.00  | 14.50 | 1.55       | 0.27          | 91.24               | 0.85                   | LUSI    |
| 2018200       | 13:51 | 17.93      | -97.72      | 48.00            | 45.96        | 10.94         | 89.62    | 41.37   | 295.58       | -72.00 | 6.75  | 1.25       | 0.26          | 307.35              | 0.64                   | LUSI    |
| 2018229       | 15:55 | -7.37      | 119.80      | 529.00           | 45.96        | 10.94         | 108.36   | 315.93  | 81.47        | 66.00  | 8.00  | 1.52       | 0.26          | 91.53               | 0.93                   | LUSI    |
| 2018240       | 22:55 | 16.80      | 146.84      | 55.00            | 45.96        | 10.94         | 105.90   | 329.68  | 43.88        | 66.00  | 6.00  | 1.72       | 0.19          | 220.47              | 1.27                   | LUSI    |
| 2018250       | 02:32 | -2.35      | -78.90      | 93.00            | 45.96        | 10.94         | 91.56    | 44.25   | 268.26       | 53.00  | 7.25  | 0.90       | 0.06          | 95.34               | 0.33                   | LUSI    |
| 2016153       | 23:16 | -2.10      | 100.67      | 50.00            | 45.77        | 9.72          | 92.16    | 315.55  | 90.78        | 53.00  | 4.50  | 2.02       | 0.09          | 91.82               | 1.12                   | MDI     |
| 2016217       | 16:44 | 24.94      | 142.01      | 510.00           | 45.77        | 9.72          | 97.36    | 328.53  | 42.62        | 63.00  | 11.00 | 1.23       | 0.26          | 214.69              | 0.97                   | MDI     |
| 2017283       | 06:52 | -18.57     | -69.75      | 85.00            | 45.77        | 9.72          | 96.01    | 43.78   | 249.68       | 82.00  | 13.75 | 1.38       | 0.53          | 246.18              | 1.14                   | MDI     |
| 2018092       | 14:00 | -20.66     | -63.01      | 559.00           | 45.77        | 9.72          | 93.20    | 42.02   | 243.59       | 74.00  | 2.75  | 1.77       | 0.36          | 246.80              | 0.44                   | MDI     |
| 2018181       | 04:16 | 19.02      | -105.12     | 15.00            | 45.77        | 9.72          | 92.68    | 39.49   | 300.74       | 60.00  | 22.00 | 0.45       | 0.34          | 116.94              | 1.03                   | MDI     |
| 2015135       | 20:46 | -2.54      | 102.22      | 151.00           | 46.62        | 10.55         | 92.98    | 316.37  | 90.53        | 48.00  | 19.00 | 1.00       | 0.23          | 90.17               | 5.30                   | MOSI    |
| 2016153       | 23:16 | -2.10      | 100.67      | 50.00            | 46.62        | 10.55         | 91.59    | 316.40  | 91.35        | 85.00  | 14.75 | 1.90       | 0.59          | 102.29              | 1.52                   | MOSI    |
| 2016211       | 21:38 | 18.54      | 145.51      | 196.00           | 46.62        | 10.55         | 103.48   | 329.90  | 43.66        | 54.00  | 2.00  | 1.62       | 0.14          | 219.24              | 0.27                   | MOSI    |
| 2016217       | 16:44 | 24.94      | 142.01      | 510.00           | 46.62        | 10.55         | 96.35    | 328.68  | 43.20        | 62.00  | 5.00  | 1.25       | 0.14          | 219.15              | 0.52                   | MOSI    |
| 2016238       | 17:24 | 30.61      | 137.85      | 456.00           | 46.62        | 10.55         | 89.60    | 326.75  | 43.30        | 50.00  | 24.75 | 1.35       | 0.40          | 214.56              | 1.31                   | MOSI    |
| 2015232       | 11:20 | 0.49       | 126.59      | 46.00            | 46.93        | 11.41         | 106.58   | 319.67  | 70.77        | 49.00  | 4.50  | 1.82       | 0.15          | 67.52               | 1.99                   | ROSI    |
| 2015259       | 08:00 | 1.88       | 126.43      | 41.00            | 46.93        | 11.41         | 105.42   | 319.89  | 69.97        | 52.00  | 4.00  | 1.88       | 0.17          | 71.09               | 0.98                   | ROSI    |
| 2015351       | 20:09 | 15.80      | -93.63      | 85.00            | 46.93        | 11.41         | 88.52    | 41.46   | 291.56       | 83.00  | 7.75  | 1.20       | 0.24          | 105.54              | 0.73                   | ROSI    |
| 2016139       | 08:17 | 0.43       | -79.79      | 16.00            | 46.93        | 11.41         | 90.51    | 43.25   | 271.17       | 72.00  | 3.50  | 1.77       | 0.19          | 88.01               | 0.86                   | ROSI    |
| 2016139       | 17:06 | 0.49       | -79.62      | 29.00            | 46.93        | 11.41         | 90.35    | 43.26   | 271.08       | 81.00  | 2.00  | 2.27       | 0.19          | 94.01               | 0.33                   | ROSI    |
| 2016153       | 23:16 | -2.10      | 100.67      | 50.00            | 46.93        | 11.41         | 91.01    | 316.73  | 91.97        | 64.00  | 6.75  | 1.97       | 0.13          | 100.06              | 1.37                   | ROSI    |
| 2016159       | 11:11 | 18.36      | -105.17     | 10.00            | 46.93        | 11.41         | 93.63    | 37.89   | 301.67       | 77.00  | 24.50 | 0.65       | 0.54          | 117.63              | 0.84                   | ROSI    |
| 2016193       | 02:31 | 0.58       | -79.64      | 21.00            | 46.93        | 11.41         | 90.30    | 43.26   | 271.16       | 74.00  | 8.50  | 1.30       | 0.29          | 93.43               | 0.18                   | ROSI    |
| 2016211       | 21:38 | 18.54      | 145.51      | 196.00           | 46.93        | 11.41         | 102.85   | 329.68  | 44.33        | 55.00  | 3.00  | 2.27       | 0.25          | 221.25              | 0.75                   | ROSI    |
| 2016238       | 17:24 | 30.61      | 137.85      | 456.00           | 46.93        | 11.41         | 88.97    | 326.53  | 43.92        | 58.00  | 3.75  | 2.22       | 0.09          | 216.77              | 0.64                   | ROSI    |
| 2016293       | 00:46 | -4.86      | 108.16      | 614.00           | 46.93        | 11.41         | 98.14    | 316.56  | 88.40        | 46.00  | 12.50 | 1.55       | 0.34          | 77.94               | 6.67                   | ROSI    |
| 2017010       | 06:33 | 4.48       | 122.62      | 627.00           | 46.93        | 11.41         | 100.99   | 319.39  | 71.23        | 49.00  | 6.25  | 1.52       | 0.21          | 77.01               | 2.43                   | ROSI    |
| 2017196       | 12:32 | 0.41       | 121.98      | 113.00           | 46.93        | 11.41         | 103.63   | 318.68  | 74.44        | 53.00  | 4.50  | 2.05       | 0.11          | 76.36               | 1.80                   | ROSI    |
| 2017243       | 17:26 | -1.16      | 99.69       | 43.00            | 46.93        | 11.41         | 89.66    | 316.76  | 92.04        | 57.00  | 10.25 | 2.00       | 0.21          | 94.05               | 1.40                   | ROSI    |
| 2018229       | 15:55 | -7.37      | 119.80      | 529.00           | 46.93        | 11.41         | 107.89   | 316.89  | 81.51        | 68.00  | 5.75  | 2.25       | 0.20          | 96.68               | 2.21                   | ROSI    |
| 2018250       | 02:32 | -2.35      | -78.90      | 93.00            | 46.93        | 11.41         | 91.91    | 43.29   | 268.63       | 74.00  | 5.00  | 1.92       | 0.48          | 83.57               | 0.57                   | ROSI    |
| 2015155       | 23:35 | 5.99       | 116.54      | 10.00            | 46.21        | 7.60          | 98.61    | 318.37  | 72.07        | 24.00  | 12.00 | 1.48       | 0.26          | 80.26               | 1.70                   | VANNI   |
| 2015161       | 14:12 | -22.40     | -68.43      | 124.00           | 46.21        | 7.60          | 96.74    | 42.73   | 244.73       | 39.00  | 18.25 | 1.08       | 0.43          | 67.66               | 1.02                   | VANNI   |
| 2016153       | 23:16 | -2.10      | 100.67      | 50.00            | 46.21        | 7.60          | 93.63    | 315.99  | 89.24        | 36.00  | 20.00 | 1.53       | 0.33          | 91.94               | 1.17                   | VANNI   |
| 2016159       | 19:35 | 1.28       | 126.37      | 31.00            | 46.21        | 7.60          | 108.55   | 320.05  | 67.57        | 35.00  | 22.00 | 1.28       | 0.40          | 76.59               | 1.88                   | VANNI   |
| 2016217       | 14:35 | -22.33     | -66.01      | 270.00           | 46.21        | 7.60          | 95.18    | 41.99   | 243.11       | 38.00  | 20.00 | 1.15       | 0.60          | 67.25               | 2.90                   | VANNI   |
| 2016293       | 00:46 | -4.86      | 108.16      | 614.00           | 46.21        | 7.60          | 100.80   | 315.97  | 85.74        | 16.00  | 11.75 | 1.63       | 0.39          | 80.21               | 2.53                   | VANNI   |
| 2017010       | 06:33 | 4.48       | 122.62      | 627.00           | 46.21        | 7.60          | 103.71   | 319.63  | 68.42        | 35.00  | 9.75  | 1.68       | 0.19          | 78.04               | 2.20                   | VANNI   |
| 2017105       | 08:39 | -23.27     | -67.72      | 155.00           | 46.21        | 7.60          | 96.94    | 42.59   | 243.66       | 54.00  | 14.75 | 1.75       | 0.62          | 69.33               | 0.75                   | VANNI   |
| 2017132       | 11:01 | 12.92      | -90.06      | 16.00            | 46.21        | 7.60          | 86.01    | 43.62   | 284.38       | 31.00  | 4.75  | 1.75       | 0.43          | 109.61              | 0.57                   | VANNI   |
| 2017196       | 12:32 | 0.41       | 121.98      | 113.00           | 46.21        | 7.60          | 106.35   | 318.76  | 71.66        | 39.00  | 14.00 | 1.85       | 0.27          | 79.82               | 3.67                   | VANNI   |
| 2017243       | 17:26 | -1.16      | 99.69       | 43.00            | 46.21        | 7.60          | 92.28    | 316.01  | 89.29        | 45.00  | 20.75 | 1.43       | 0.38          | 100.15              | 1.48                   | VANNI   |
| 2017283       | 06:52 | -18.57     | -69.75      | 85.00            | 46.21        | 7.60          | 94.79    | 42.84   | 248.25       | 7.00   | 15.50 | 1.10       | 0.35          | 65.41               | 1.17                   | VANNI   |
| 2018092       | 14:00 | -20.66     | -63.01      | 559.00           | 46.21        | 7.60          | 92.09    | 40.96   | 242.12       | 13.00  | 22.50 | 0.98       | 0.51          | 68.43               | 2.23                   | VANNI   |
| 2018250       | 02:32 | -2.35      | -78.90      | 93.00            | 46.21        | 7.60          | 89.25    | 43.88   | 265.86       | 13.00  | 3.00  | 1.15       | 0.18          | 90.24               | 0.06                   | VANNI   |
| 2018271       | 10:22 | -0.18      | 119.84      | 10.00            | 46.21        | 7.60          | 105.37   | 318.19  | 73.73        | 18.00  | 13.75 | 1.85       | 0.41          | 78.77               | 1.01                   | VANNI   |

| DATE (YYYYJJ) | TIME  | Event Lat. | Event Long. | Event depth (km) | Station Lat. | Station Long. | Distance | Azimuth | Back Azimuth | Phi   | dPhi  | Delay Time | d(Delay Time) | Source Polarization | d(Source Polarization) | Station |
|---------------|-------|------------|-------------|------------------|--------------|---------------|----------|---------|--------------|-------|-------|------------|---------------|---------------------|------------------------|---------|
| 2016139       | 08:17 | 0.43       | -79.79      | 16.00            | 47.30        | 7.09          | 87.56    | 42.86   | 268.00       | 68.00 | 21.00 | 0.80       | 0.35          | 84.88               | 1.13                   | SAIRA   |
| 2016153       | 23:16 | -2.10      | 100.67      | 50.00            | 47.30        | 7.09          | 93.97    | 317.09  | 88.79        | 55.00 | 10.25 | 1.45       | 0.21          | 87.79               | 1.58                   | SAIRA   |
| 2016211       | 21:38 | 18.54      | 145.51      | 196.00           | 47.30        | 7.09          | 104.56   | 332.18  | 40.58        | 68.00 | 10.50 | 0.65       | 0.08          | 208.89              | 0.41                   | SAIRA   |
| 2017243       | 17:26 | -1.16      | 99.69       | 43.00            | 47.30        | 7.09          | 92.62    | 317.11  | 88.88        | 25.00 | 11.00 | 1.75       | 0.31          | 83.93               | 2.93                   | SAIRA   |
| 2018092       | 14:00 | -20.66     | -63.01      | 559.00           | 47.30        | 7.09          | 92.29    | 39.82   | 241.79       | 39.00 | 7.75  | 1.12       | 0.45          | 52.56               | 1.40                   | SAIRA   |
| 2016153       | 23:16 | -2.10      | 100.67      | 50.00            | 47.38        | 7.17          | 93.91    | 317.16  | 88.85        | 75.00 | 5.00  | 1.80       | 0.12          | 111.52              | 0.95                   | MTI02   |
| 2016153       | 23:16 | -2.10      | 100.67      | 50.00            | 47.44        | 8.01          | 93.33    | 317.21  | 89.47        | 53.00 | 5.25  | 1.60       | 0.07          | 96.25               | 0.88                   | EMMET   |
| 2016211       | 21:38 | 18.54      | 145.51      | 196.00           | 47.44        | 8.01          | 104.05   | 331.78  | 41.36        | 53.00 | 10.00 | 1.23       | 0.43          | 217.56              | 0.47                   | EMMET   |
| 2017196       | 12:32 | 0.41       | 121.98      | 113.00           | 47.44        | 8.01          | 105.70   | 319.88  | 71.65        | 38.00 | 3.50  | 1.32       | 0.10          | 63.18               | 0.28                   | EMMET   |
| 2015161       | 14:12 | -22.40     | -68.43      | 124.00           | 47.23        | 8.01          | 97.44    | 41.92   | 245.13       | 60.00 | 22.75 | 1.02       | 0.49          | 69.06               | 1.47                   | DAGMA   |
| 2016153       | 23:16 | -2.10      | 100.67      | 50.00            | 47.23        | 8.01          | 93.34    | 317.01  | 89.48        | 37.00 | 5.00  | 1.62       | 0.07          | 84.76               | 0.41                   | DAGMA   |
| 2016159       | 19:35 | 1.28       | 126.37      | 31.00            | 47.23        | 8.01          | 107.90   | 320.93  | 67.60        | 63.00 | 5.50  | 1.70       | 0.44          | 74.50               | 2.14                   | DAGMA   |
| 2016211       | 21:38 | 18.54      | 145.51      | 196.00           | 47.23        | 8.01          | 104.20   | 331.64  | 41.39        | 60.00 | 22.50 | 1.60       | 0.74          | 224.45              | 1.11                   | DAGMA   |
| 2016238       | 17:24 | 30.61      | 137.85      | 456.00           | 47.23        | 8.01          | 90.32    | 328.45  | 41.45        | 55.00 | 2.50  | 1.75       | 0.13          | 219.28              | 0.31                   | DAGMA   |
| 2017243       | 17:26 | -1.16      | 99.69       | 43.00            | 47.23        | 8.01          | 91.99    | 317.03  | 89.56        | 53.00 | 23.75 | 1.17       | 0.36          | 99.96               | 2.75                   | DAGMA   |
| 2017283       | 06:52 | -18.57     | -69.75      | 85.00            | 47.23        | 8.01          | 95.43    | 41.99   | 248.62       | 63.00 | 1.75  | 1.48       | 0.17          | 73.06               | 0.22                   | DAGMA   |
| 2018217       | 12:06 | -8.26      | 116.44      | 34.00            | 47.23        | 8.01          | 108.52   | 317.01  | 82.02        | 34.00 | 11.75 | 1.27       | 0.22          | 85.37               | 2.51                   | DAGMA   |
| 2018236       | 09:24 | -11.04     | -70.83      | 630.00           | 47.23        | 8.01          | 90.56    | 41.96   | 254.41       | 62.00 | 6.00  | 1.32       | 0.21          | 82.14               | 0.33                   | DAGMA   |
| 2018250       | 02:32 | -2.35      | -78.90      | 93.00            | 47.23        | 8.01          | 89.61    | 42.88   | 266.15       | 79.00 | 9.25  | 1.62       | 0.37          | 100.28              | 1.25                   | DAGMA   |
| 2016153       | 23:16 | -2.10      | 100.67      | 50.00            | 47.37        | 8.58          | 92.95    | 317.14  | 89.89        | 40.00 | 2.50  | 1.67       | 0.04          | 82.34               | 0.27                   | ZUR     |
| 2016211       | 21:38 | 18.54      | 145.51      | 196.00           | 47.37        | 8.58          | 103.84   | 331.44  | 41.86        | 61.00 | 4.00  | 1.38       | 0.26          | 225.69              | 0.44                   | ZUR     |
| 2016238       | 17:24 | 30.61      | 137.85      | 456.00           | 47.37        | 8.58          | 89.96    | 328.25  | 41.87        | 52.00 | 5.75  | 1.67       | 0.26          | 215.77              | 1.27                   | ZUR     |
| 2017196       | 12:32 | 0.41       | 121.98      | 113.00           | 47.37        | 8.58          | 105.35   | 319.69  | 72.12        | 39.00 | 4.25  | 1.62       | 0.12          | 63.86               | 0.61                   | ZUR     |
| 2017243       | 17:26 | -1.16      | 99.69       | 43.00            | 47.37        | 8.58          | 91.60    | 317.17  | 89.97        | 49.00 | 18.00 | 1.82       | 0.29          | 94.54               | 1.40                   | ZUR     |
| 2017283       | 06:52 | -18.57     | -69.75      | 85.00            | 47.37        | 8.58          | 95.84    | 42.00   | 249.04       | 59.00 | 3.50  | 1.35       | 0.34          | 67.47               | 0.51                   | ZUR     |
| 2018236       | 09:24 | -11.04     | -70.83      | 630.00           | 47.37        | 8.58          | 90.97    | 41.93   | 254.83       | 57.00 | 4.00  | 1.05       | 0.12          | 77.05               | 0.31                   | ZUR     |
| 2018250       | 02:32 | -2.35      | -78.90      | 93.00            | 47.37        | 8.58          | 90.00    | 42.77   | 266.57       | 58.00 | 5.50  | 1.00       | 0.14          | 81.46               | 0.24                   | ZUR     |
| 2015260       | 04:15 | -31.42     | -71.69      | 27.00            | 47.59        | 8.25          | 106.31   | 43.98   | 241.29       | 36.00 | 14.75 | 2.65       | 0.22          | 69.02               | 4.24                   | ACB     |
| 2016153       | 23:16 | -2.10      | 100.67      | 50.00            | 47.59        | 8.25          | 93.17    | 317.36  | 89.63        | 43.00 | 15.50 | 1.75       | 0.24          | 81.58               | 1.85                   | ACB     |
| 2017243       | 17:26 | -1.16      | 99.69       | 43.00            | 47.59        | 8.25          | 91.82    | 317.39  | 89.72        | 47.00 | 13.25 | 1.67       | 0.24          | 86.40               | 1.59                   | ACB     |
| 2015135       | 20:46 | -2.54      | 102.22      | 151.00           | 46.87        | 8.43          | 94.44    | 316.63  | 88.97        | 47.00 | 12.75 | 1.53       | 0.29          | 78.33               | 2.59                   | BNALP   |
| 2015150       | 11:43 | 27.84      | 140.49      | 664.00           | 46.87        | 8.43          | 93.96    | 329.30  | 41.22        | 56.00 | 6.00  | 1.48       | 0.35          | 220.62              | 0.44                   | BNALP   |
| 2015155       | 23:35 | 5.99       | 116.54      | 10.00            | 46.87        | 8.43          | 97.86    | 318.83  | 72.61        | 58.00 | 10.75 | 2.33       | 0.62          | 79.90               | 2.60                   | BNALP   |
| 2015232       | 11:20 | 0.49       | 126.59      | 46.00            | 46.87        | 8.43          | 108.52   | 320.37  | 68.39        | 51.00 | 23.00 | 1.90       | 0.64          | 65.16               | 2.11                   | BNALP   |
| 2015271       | 15:48 | -23.80     | -66.61      | 219.00           | 46.87        | 8.43          | 97.45    | 41.95   | 243.18       | 28.00 | 12.25 | 1.43       | 0.37          | 60.73               | 4.37                   | BNALP   |
| 2015351       | 20:09 | 15.80      | -93.63      | 85.00            | 46.87        | 8.43          | 86.62    | 42.23   | 289.42       | 43.00 | 11.50 | 1.75       | 0.55          | 115.37              | 1.34                   | BNALP   |
| 2016139       | 08:17 | 0.43       | -79.79      | 16.00            | 46.87        | 8.43          | 88.46    | 43.31   | 268.99       | 36.00 | 11.50 | 1.38       | 0.28          | 90.57               | 2.33                   | BNALP   |
| 2016149       | 10:06 | -56.24     | -26.94      | 78.00            | 46.87        | 8.43          | 106.93   | 24.52   | 199.74       | 47.00 | 17.75 | 1.03       | 0.34          | 199.83              | 0.57                   | BNALP   |
| 2016153       | 23:16 | -2.10      | 100.67      | 50.00            | 46.87        | 8.43          | 93.06    | 316.64  | 89.80        | 59.00 | 11.25 | 1.58       | 0.27          | 88.63               | 1.18                   | BNALP   |
| 2016157       | 16:45 | -4.59      | 125.63      | 429.00           | 46.87        | 8.43          | 111.75   | 318.93  | 72.65        | 61.00 | 5.00  | 1.70       | 0.18          | 85.56               | 1.45                   | BNALP   |
| 2016159       | 19:35 | 1.28       | 126.37      | 31.00            | 46.87        | 8.43          | 107.78   | 320.47  | 68.04        | 49.00 | 19.25 | 1.45       | 0.73          | 66.09               | 1.07                   | BNALP   |
| 2016201       | 05:38 | -30.25     | -71.97      | 8.00             | 46.87        | 8.43          | 105.40   | 44.56   | 242.25       | 61.00 | 6.00  | 2.53       | 0.54          | 73.50               | 2.16                   | BNALP   |
| 2016207       | 17:46 | -26.11     | -70.51      | 72.00            | 46.87        | 8.43          | 101.54   | 43.41   | 244.24       | 45.00 | 16.75 | 1.48       | 0.65          | 66.33               | 2.47                   | BNALP   |
| 2016211       | 21:38 | 18.54      | 145.51      | 196.00           | 46.87        | 8.43          | 104.29   | 331.18  | 41.81        | 62.00 | 4.25  | 1.33       | 0.21          | 224.73              | 0.39                   | BNALP   |
| 2016217       | 14:35 | -22.33     | -66.01      | 270.00           | 46.87        | 8.43          | 95.99    | 41.65   | 243.75       | 47.00 | 15.50 | 1.23       | 0.46          | 66.17               | 3.16                   | BNALP   |
| 2016217       | 16:44 | 24.94      | 142.01      | 510.00           | 46.87        | 8.43          | 97.14    | 329.94  | 41.51        | 50.00 | 2.25  | 2.12       | 0.11          | 213.46              | 0.46                   | BNALP   |
| 2016232       | 07:52 | -55.29     | -31.88      | 10.00            | 46.87        | 8.43          | 107.30   | 27.70   | 202.80       | 38.00 | 7.00  | 1.35       | 0.28          | 196.73              | 0.22                   | BNALP   |

| DATE (YYYYJJ) | TIME  | Event Lat. | Event Long. | Event depth (km) | Station Lat. | Station Long. | Distance | Azimuth | Back Azimuth | Phi   | dPhi  | Delay Time | d(Delay Time) | Source Polarization | d(Source Polarization) | Station |
|---------------|-------|------------|-------------|------------------|--------------|---------------|----------|---------|--------------|-------|-------|------------|---------------|---------------------|------------------------|---------|
| 2016238       | 17:24 | 30.61      | 137.85      | 456.00           | 46.87        | 8.43          | 90.40    | 328.00  | 41.76        | 52.00 | 4.75  | 1.98       | 0.26          | 216.66              | 0.56                   | BNALP   |
| 2016293       | 00:46 | -4.86      | 108.16      | 614.00           | 46.87        | 8.43          | 100.19   | 316.60  | 86.22        | 54.00 | 37.75 | 1.45       | 0.85          | 81.74               | 4.13                   | BNALP   |
| 2017010       | 06:33 | 4.48       | 122.62      | 627.00           | 46.87        | 8.43          | 102.94   | 320.05  | 68.92        | 45.00 | 2.50  | 1.83       | 0.12          | 66.87               | 0.42                   | BNALP   |
| 2017140       | 01:26 | 9.38       | 123.95      | 533.00           | 46.87        | 8.43          | 100.02   | 321.04  | 64.73        | 54.00 | 19.50 | 1.33       | 0.94          | 67.55               | 1.28                   | BNALP   |
| 2017181       | 22:49 | -0.28      | -80.49      | 13.00            | 46.87        | 8.43          | 89.46    | 43.31   | 269.02       | 56.00 | 17.25 | 1.15       | 0.38          | 97.87               | 3.16                   | BNALP   |
| 2017196       | 12:32 | 0.41       | 121.98      | 113.00           | 46.87        | 8.43          | 105.61   | 319.23  | 72.13        | 52.00 | 7.00  | 2.08       | 0.28          | 73.74               | 1.82                   | BNALP   |
| 2017223       | 05:48 | 14.01      | 120.74      | 172.00           | 46.87        | 8.43          | 94.46    | 320.46  | 64.25        | 51.00 | 6.00  | 2.00       | 0.36          | 67.02               | 2.57                   | BNALP   |
| 2017243       | 17:26 | -1.16      | 99.69       | 43.00            | 46.87        | 8.43          | 91.71    | 316.67  | 89.87        | 61.00 | 7.50  | 1.88       | 0.21          | 91.29               | 0.81                   | BNALP   |
| 2017283       | 06:52 | -18.57     | -69.75      | 85.00            | 46.87        | 8.43          | 95.56    | 42.43   | 248.88       | 39.00 | 8.75  | 1.40       | 0.24          | 70.67               | 1.28                   | BNALP   |
| 2018229       | 15:55 | -7.37      | 119.80      | 529.00           | 46.87        | 8.43          | 109.92   | 317.19  | 79.24        | 67.00 | 6.50  | 2.52       | 0.37          | 86.11               | 0.85                   | BNALP   |
| 2018236       | 09:24 | -11.04     | -70.83      | 630.00           | 46.87        | 8.43          | 90.74    | 42.39   | 254.71       | 38.00 | 14.00 | 1.40       | 0.25          | 76.79               | 1.91                   | BNALP   |
| 2018250       | 02:32 | -2.35      | -78.90      | 93.00            | 46.87        | 8.43          | 89.86    | 43.26   | 266.45       | 33.00 | 3.25  | 1.48       | 0.06          | 88.13               | 0.22                   | BNALP   |
| 2018271       | 10:22 | -0.18      | 119.84      | 10.00            | 46.87        | 8.43          | 104.64   | 318.69  | 74.20        | 62.00 | 3.75  | 2.52       | 0.20          | 84.45               | 0.43                   | BNALP   |
| 2015135       | 20:46 | -2.54      | 102.22      | 151.00           | 46.60        | 8.75          | 94.22    | 316.35  | 89.23        | 36.00 | 9.00  | 1.50       | 0.16          | 84.44               | 2.13                   | NALPS   |
| 2015155       | 23:35 | 5.99       | 116.54      | 10.00            | 46.60        | 8.75          | 97.73    | 318.50  | 72.89        | 47.00 | 11.00 | 1.02       | 0.19          | 79.44               | 1.57                   | NALPS   |
| 2015232       | 11:20 | 0.49       | 126.59      | 46.00            | 46.60        | 8.75          | 108.41   | 320.01  | 68.74        | 50.00 | 4.50  | 1.72       | 0.11          | 79.16               | 0.84                   | NALPS   |
| 2015259       | 08:00 | 1.88       | 126.43      | 41.00            | 46.60        | 8.75          | 107.25   | 320.25  | 67.94        | 49.00 | 10.25 | 1.42       | 0.25          | 75.87               | 0.63                   | NALPS   |
| 2016139       | 08:17 | 0.43       | -79.79      | 16.00            | 46.60        | 8.75          | 88.68    | 43.59   | 269.24       | 37.00 | 8.50  | 1.15       | 0.15          | 92.51               | 1.55                   | NALPS   |
| 2016153       | 23:16 | -2.10      | 100.67      | 50.00            | 46.60        | 8.75          | 92.84    | 316.37  | 90.05        | 49.00 | 2.25  | 1.50       | 0.03          | 95.24               | 0.14                   | NALPS   |
| 2016159       | 19:35 | 1.28       | 126.37      | 31.00            | 46.60        | 8.75          | 107.67   | 320.11  | 68.39        | 52.00 | 6.00  | 1.45       | 0.17          | 78.35               | 1.93                   | NALPS   |
| 2016238       | 17:24 | 30.61      | 137.85      | 456.00           | 46.60        | 8.75          | 90.46    | 327.65  | 42.00        | 53.00 | 5.00  | 2.67       | 0.62          | 222.65              | 0.80                   | NALPS   |
| 2017010       | 06:33 | 4.48       | 122.62      | 627.00           | 46.60        | 8.75          | 102.83   | 319.70  | 69.23        | 52.00 | 4.75  | 1.57       | 0.21          | 74.40               | 1.11                   | NALPS   |
| 2017196       | 12:32 | 0.41       | 121.98      | 113.00           | 46.60        | 8.75          | 105.48   | 318.89  | 72.45        | 47.00 | 4.25  | 1.52       | 0.08          | 79.79               | 0.75                   | NALPS   |
| 2018229       | 15:55 | -7.37      | 119.80      | 529.00           | 46.60        | 8.75          | 109.75   | 316.86  | 79.58        | 47.00 | 10.25 | 1.35       | 0.30          | 72.05               | 1.29                   | NALPS   |
| 2015135       | 20:46 | -2.54      | 102.22      | 151.00           | 46.58        | 8.32          | 94.52    | 316.34  | 88.92        | 59.00 | 5.25  | 2.08       | 0.10          | 103.97              | 1.72                   | GRIMS   |
| 2015155       | 23:35 | 5.99       | 116.54      | 10.00            | 46.58        | 8.32          | 98.02    | 318.57  | 72.57        | 56.00 | 6.00  | 1.90       | 0.21          | 85.73               | 1.57                   | GRIMS   |
| 2015259       | 08:00 | 1.88       | 126.43      | 41.00            | 46.58        | 8.32          | 107.53   | 320.35  | 67.60        | 47.00 | 9.25  | 2.35       | 0.35          | 73.51               | 3.84                   | GRIMS   |
| 2016139       | 08:17 | 0.43       | -79.79      | 16.00            | 46.58        | 8.32          | 88.39    | 43.61   | 268.93       | 39.00 | 4.00  | 1.35       | 0.10          | 96.99               | 0.36                   | GRIMS   |
| 2016153       | 23:16 | -2.10      | 100.67      | 50.00            | 46.58        | 8.32          | 93.13    | 316.35  | 89.74        | 48.00 | 2.75  | 1.92       | 0.06          | 96.58               | 0.22                   | GRIMS   |
| 2016201       | 05:38 | -30.25     | -71.97      | 8.00             | 46.58        | 8.32          | 105.20   | 44.79   | 242.11       | 46.00 | 6.25  | 1.82       | 0.33          | 66.96               | 2.55                   | GRIMS   |
| 2016207       | 17:46 | -26.11     | -70.51      | 72.00            | 46.58        | 8.32          | 101.35   | 43.65   | 244.11       | 45.00 | 3.50  | 1.48       | 0.12          | 69.56               | 0.69                   | GRIMS   |
| 2016217       | 16:44 | 24.94      | 142.01      | 510.00           | 46.58        | 8.32          | 97.41    | 329.80  | 41.45        | 51.00 | 24.25 | 1.27       | 0.89          | 221.89              | 0.86                   | GRIMS   |
| 2016293       | 00:46 | -4.86      | 108.16      | 614.00           | 46.58        | 8.32          | 100.28   | 316.31  | 86.20        | 53.00 | 4.00  | 1.70       | 0.09          | 90.89               | 0.74                   | GRIMS   |
| 2017105       | 08:39 | -23.27     | -67.72      | 155.00           | 46.58        | 8.32          | 97.55    | 42.48   | 244.19       | 55.00 | 8.75  | 1.42       | 0.49          | 71.62               | 1.02                   | GRIMS   |
| 2017196       | 12:32 | 0.41       | 121.98      | 113.00           | 46.58        | 8.32          | 105.76   | 318.97  | 72.12        | 46.00 | 8.75  | 2.17       | 0.22          | 78.88               | 2.89                   | GRIMS   |
| 2017283       | 06:52 | -18.57     | -69.75      | 85.00            | 46.58        | 8.32          | 95.39    | 42.68   | 248.78       | 52.00 | 5.00  | 1.70       | 0.28          | 71.12               | 1.16                   | GRIMS   |
| 2018209       | 23:07 | -8.24      | 116.51      | 14.00            | 46.58        | 8.32          | 108.44   | 316.31  | 82.40        | 72.00 | 13.75 | 1.97       | 0.55          | 91.99               | 1.24                   | GRIMS   |
| 2018229       | 15:55 | -7.37      | 119.80      | 529.00           | 46.58        | 8.32          | 110.05   | 316.90  | 79.26        | 41.00 | 3.00  | 1.57       | 0.06          | 75.45               | 0.21                   | GRIMS   |
| 2018250       | 02:32 | -2.35      | -78.90      | 93.00            | 46.58        | 8.32          | 89.77    | 43.55   | 266.38       | 44.00 | 12.50 | 1.30       | 0.24          | 96.39               | 1.18                   | GRIMS   |
| 2018271       | 10:22 | -0.18      | 119.84      | 10.00            | 46.58        | 8.32          | 104.79   | 318.42  | 74.19        | 49.00 | 10.00 | 1.92       | 0.32          | 78.00               | 0.43                   | GRIMS   |
| 2015135       | 20:46 | -2.54      | 102.22      | 151.00           | 46.36        | 7.30          | 95.23    | 316.14  | 88.20        | 25.00 | 4.25  | 1.60       | 0.18          | 94.60               | 0.35                   | SENIN   |
| 2015161       | 14:12 | -22.40     | -68.43      | 124.00           | 46.36        | 7.30          | 96.62    | 42.50   | 244.54       | 24.00 | 12.50 | 1.10       | 0.19          | 71.04               | 1.07                   | SENIN   |
| 2015271       | 15:48 | -23.80     | -66.61      | 219.00           | 46.36        | 7.30          | 96.53    | 42.05   | 242.35       | 2.00  | 6.50  | 1.40       | 0.23          | 66.72               | 0.40                   | SENIN   |
| 2016153       | 23:16 | -2.10      | 100.67      | 50.00            | 46.36        | 7.30          | 93.84    | 316.14  | 89.01        | 20.00 | 11.50 | 2.08       | 0.38          | 82.93               | 2.05                   | SENIN   |
| 2016159       | 19:35 | 1.28       | 126.37      | 31.00            | 46.36        | 7.30          | 108.69   | 320.29  | 67.28        | 31.00 | 25.00 | 1.00       | 0.52          | 76.90               | 1.11                   | SENIN   |
| 2016207       | 17:46 | -26.11     | -70.51      | 72.00            | 46.36        | 7.30          | 100.62   | 43.53   | 243.40       | 11.00 | 18.00 | 1.10       | 0.44          | 66.46               | 1.02                   | SENIN   |
| 2016293       | 00:46 | -4.86      | 108.16      | 614.00           | 46.36        | 7.30          | 101.00   | 316.15  | 85.49        | 20.00 | 10.75 | 1.40       | 0.29          | 83.00               | 1.26                   | SENIN   |

| DATE (YYYYJJ) | TIME  | Event Lat. | Event Long. | Event depth (km) | Station Lat. | Station Long. | Distance | Azimuth | Back Azimuth | Phi   | dPhi  | Delay Time | d(Delay Time) | Source Polarization | d(Source Polarization) | Station |
|---------------|-------|------------|-------------|------------------|--------------|---------------|----------|---------|--------------|-------|-------|------------|---------------|---------------------|------------------------|---------|
| 2017010       | 06:33 | 4.48       | 122.62      | 627.00           | 46.36        | 7.30          | 103.85   | 319.86  | 68.15        | 16.00 | 12.25 | 1.70       | 0.32          | 72.53               | 1.03                   | SENIN   |
| 2017049       | 12:30 | -23.86     | -66.66      | 222.00           | 46.36        | 7.30          | 96.60    | 42.07   | 242.35       | 12.00 | 8.75  | 1.42       | 0.24          | 70.37               | 1.75                   | SENIN   |
| 2017105       | 08:39 | -23.27     | -67.72      | 155.00           | 46.36        | 7.30          | 96.82    | 42.36   | 243.47       | 16.00 | 6.25  | 1.00       | 0.09          | 70.99               | 0.35                   | SENIN   |
| 2017196       | 12:32 | 0.41       | 121.98      | 113.00           | 46.36        | 7.30          | 106.50   | 318.98  | 71.38        | 36.00 | 10.75 | 1.80       | 0.23          | 86.13               | 2.80                   | SENIN   |
| 2017243       | 17:26 | -1.16      | 99.69       | 43.00            | 46.36        | 7.30          | 92.49    | 316.17  | 89.07        | 23.00 | 8.50  | 2.20       | 0.30          | 85.39               | 1.76                   | SENIN   |
| 2018084       | 20:34 | -6.63      | 129.82      | 169.00           | 46.36        | 7.30          | 116.91   | 319.09  | 69.94        | 16.00 | 11.25 | 1.92       | 0.28          | 73.38               | 1.91                   | SENIN   |
| 2018229       | 15:55 | -7.37      | 119.80      | 529.00           | 46.36        | 7.30          | 110.78   | 316.82  | 78.55        | 13.00 | 18.75 | 1.77       | 0.58          | 75.31               | 1.86                   | SENIN   |
| 2018236       | 09:24 | -11.04     | -70.83      | 630.00           | 46.36        | 7.30          | 89.85    | 42.66   | 253.89       | 3.00  | 5.50  | 1.40       | 0.26          | 75.93               | 0.45                   | SENIN   |
| 2018250       | 02:32 | -2.35      | -78.90      | 93.00            | 46.36        | 7.30          | 89.06    | 43.72   | 265.64       | 77.00 | 12.00 | 0.92       | 0.27          | 95.00               | 0.26                   | SENIN   |
| 2016153       | 23:16 | -2.10      | 100.67      | 50.00            | 46.37        | 7.64          | 93.60    | 316.15  | 89.26        | 28.00 | 8.75  | 1.65       | 0.19          | 85.80               | 0.81                   | LKBD2   |
| 2016159       | 19:35 | 1.28       | 126.37      | 31.00            | 46.37        | 7.64          | 108.46   | 320.20  | 67.56        | 25.00 | 14.00 | 1.40       | 0.23          | 69.14               | 0.92                   | LKBD2   |
| 2016207       | 17:46 | -26.11     | -70.51      | 72.00            | 46.37        | 7.64          | 100.84   | 43.62   | 243.63       | 7.00  | 25.50 | 1.38       | 0.86          | 70.64               | 2.46                   | LKBD2   |
| 2016293       | 00:46 | -4.86      | 108.16      | 614.00           | 46.37        | 7.64          | 100.76   | 316.14  | 85.74        | 22.00 | 9.50  | 1.62       | 0.21          | 71.47               | 1.41                   | LKBD2   |
| 2017010       | 06:33 | 4.48       | 122.62      | 627.00           | 46.37        | 7.64          | 103.62   | 319.78  | 68.42        | 61.00 | 7.00  | 2.65       | 0.43          | 83.18               | 1.01                   | LKBD2   |
| 2017196       | 12:32 | 0.41       | 121.98      | 113.00           | 46.37        | 7.64          | 106.27   | 318.92  | 71.65        | 26.00 | 8.25  | 1.62       | 0.12          | 68.67               | 0.75                   | LKBD2   |
| 2018250       | 02:32 | -2.35      | -78.90      | 93.00            | 46.37        | 7.64          | 89.29    | 43.72   | 265.89       | 10.00 | 25.50 | 1.70       | 0.81          | 86.65               | 0.15                   | LKBD2   |
| 2018271       | 10:22 | -0.18      | 119.84      | 10.00            | 46.37        | 7.64          | 105.30   | 318.35  | 73.72        | 39.00 | 19.25 | 1.72       | 0.48          | 73.20               | 0.73                   | LKBD2   |
| 2015135       | 20:46 | -2.54      | 102.22      | 151.00           | 46.24        | 8.02          | 94.73    | 316.01  | 88.73        | 50.00 | 11.25 | 1.10       | 0.14          | 100.55              | 1.59                   | SIMPL   |
| 2015155       | 23:35 | 5.99       | 116.54      | 10.00            | 46.24        | 8.02          | 98.32    | 318.31  | 72.39        | 18.00 | 4.25  | 1.23       | 0.11          | 79.47               | 0.56                   | SIMPL   |
| 2015184       | 07:03 | 10.17      | 125.89      | 32.00            | 46.24        | 8.02          | 101.14   | 321.29  | 62.50        | 47.00 | 23.25 | 0.73       | 0.61          | 74.70               | 1.16                   | SIMPL   |
| 2015232       | 11:20 | 0.49       | 126.59      | 46.00            | 46.24        | 8.02          | 109.01   | 319.85  | 68.26        | 33.00 | 21.00 | 0.98       | 0.28          | 76.14               | 1.07                   | SIMPL   |
| 2015264       | 18:00 | -31.73     | -71.38      | 35.00            | 46.24        | 8.02          | 105.54   | 45.08   | 240.38       | 11.00 | 25.50 | 0.88       | 0.88          | 70.42               | 1.19                   | SIMPL   |
| 2016157       | 16:45 | -4.59      | 125.63      | 429.00           | 46.24        | 8.02          | 112.20   | 318.37  | 72.56        | 16.00 | 17.50 | 0.78       | 0.24          | 72.77               | 1.50                   | SIMPL   |
| 2016159       | 19:35 | 1.28       | 126.37      | 31.00            | 46.24        | 8.02          | 108.27   | 319.97  | 67.91        | 26.00 | 21.00 | 0.85       | 0.36          | 74.43               | 2.25                   | SIMPL   |
| 2016201       | 05:38 | -30.25     | -71.97      | 8.00             | 46.24        | 8.02          | 104.86   | 45.00   | 241.84       | 36.00 | 21.00 | 1.05       | 0.55          | 74.17               | 2.92                   | SIMPL   |
| 2016211       | 21:38 | 18.54      | 145.51      | 196.00           | 46.24        | 8.02          | 104.94   | 330.96  | 41.57        | 69.00 | 5.00  | 1.90       | 0.42          | 236.00              | 0.90                   | SIMPL   |
| 2016217       | 16:44 | 24.94      | 142.01      | 510.00           | 46.24        | 8.02          | 97.80    | 329.73  | 41.24        | 67.00 | 13.50 | 2.20       | 0.77          | 228.85              | 2.74                   | SIMPL   |
| 2016236       | 19:59 | -7.29      | 122.43      | 533.00           | 46.24        | 8.02          | 112.04   | 317.01  | 77.05        | 34.00 | 25.25 | 0.80       | 0.31          | 92.28               | 3.41                   | SIMPL   |
| 2017010       | 06:33 | 4.48       | 122.62      | 627.00           | 46.24        | 8.02          | 103.43   | 319.55  | 68.74        | 39.00 | 6.00  | 0.95       | 0.05          | 78.88               | 0.39                   | SIMPL   |
| 2017140       | 01:26 | 9.38       | 123.95      | 533.00           | 46.24        | 8.02          | 100.54   | 320.59  | 64.51        | 15.00 | 17.25 | 1.05       | 0.18          | 61.79               | 3.32                   | SIMPL   |
| 2017196       | 12:32 | 0.41       | 121.98      | 113.00           | 46.24        | 8.02          | 106.07   | 318.70  | 71.98        | 55.00 | 7.25  | 1.10       | 0.12          | 87.30               | 0.75                   | SIMPL   |
| 2018250       | 02:32 | -2.35      | -78.90      | 93.00            | 46.24        | 8.02          | 89.54    | 43.87   | 266.16       | 31.00 | 20.25 | 1.08       | 0.51          | 105.97              | 1.13                   | SIMPL   |
| 2015155       | 23:35 | 5.99       | 116.54      | 10.00            | 46.44        | 8.11          | 98.20    | 318.48  | 72.43        | 48.00 | 5.25  | 1.93       | 0.17          | 78.18               | 2.49                   | FIESA   |
| 2015188       | 05:30 | 43.91      | 147.97      | 49.00            | 46.44        | 8.11          | 83.28    | 333.32  | 27.98        | 77.00 | 10.75 | 1.93       | 0.07          | 202.56              | 0.96                   | FIESA   |
| 2016153       | 23:16 | -2.10      | 100.67      | 50.00            | 46.44        | 8.11          | 93.28    | 316.21  | 89.59        | 41.00 | 9.00  | 1.80       | 0.21          | 93.05               | 1.47                   | FIESA   |
| 2016207       | 17:46 | -26.11     | -70.51      | 72.00            | 46.44        | 8.11          | 101.15   | 43.71   | 243.95       | 32.00 | 3.75  | 1.38       | 0.09          | 64.15               | 0.75                   | FIESA   |
| 2016217       | 14:35 | -22.33     | -66.01      | 270.00           | 46.44        | 8.11          | 95.60    | 41.94   | 243.49       | 43.00 | 6.50  | 2.18       | 0.41          | 66.59               | 2.81                   | FIESA   |
| 2016217       | 16:44 | 24.94      | 142.01      | 510.00           | 46.44        | 8.11          | 97.61    | 329.82  | 41.30        | 53.00 | 9.25  | 1.15       | 0.44          | 222.32              | 0.53                   | FIESA   |
| 2016293       | 00:46 | -4.86      | 108.16      | 614.00           | 46.44        | 8.11          | 100.43   | 316.18  | 86.07        | 45.00 | 6.00  | 1.85       | 0.16          | 86.83               | 1.86                   | FIESA   |
| 2017010       | 06:33 | 4.48       | 122.62      | 627.00           | 46.44        | 8.11          | 103.30   | 319.71  | 68.77        | 38.00 | 7.75  | 1.42       | 0.17          | 72.86               | 0.91                   | FIESA   |
| 2017243       | 17:26 | -1.16      | 99.69       | 43.00            | 46.44        | 8.11          | 91.92    | 316.23  | 89.66        | 39.00 | 7.50  | 1.62       | 0.14          | 90.39               | 1.28                   | FIESA   |
| 2018250       | 02:32 | -2.35      | -78.90      | 93.00            | 46.44        | 8.11          | 89.62    | 43.68   | 266.23       | 25.00 | 2.50  | 1.23       | 0.06          | 88.32               | 0.23                   | FIESA   |
| 2018271       | 10:22 | -0.18      | 119.84      | 10.00            | 46.44        | 8.11          | 104.97   | 318.32  | 74.06        | 44.00 | 21.75 | 1.55       | 0.57          | 76.60               | 0.66                   | FIESA   |
| 2015135       | 20:46 | -2.54      | 102.22      | 151.00           | 46.83        | 9.11          | 93.97    | 316.58  | 89.47        | 38.00 | 7.00  | 1.65       | 0.14          | 89.50               | 1.63                   | PANIX   |
| 2015155       | 23:35 | 5.99       | 116.54      | 10.00            | 46.83        | 9.11          | 97.42    | 318.65  | 73.13        | 42.00 | 9.25  | 1.43       | 0.23          | 74.98               | 2.59                   | PANIX   |
| 2015184       | 07:03 | 10.17      | 125.89      | 32.00            | 46.83        | 9.11          | 100.20   | 321.47  | 63.26        | 38.00 | 13.00 | 1.30       | 0.38          | 59.29               | 0.86                   | PANIX   |
| 2015232       | 11:20 | 0.49       | 126.59      | 46.00            | 46.83        | 9.11          | 108.10   | 320.14  | 68.96        | 48.00 | 3.75  | 1.38       | 0.11          | 74.48               | 0.61                   | PANIX   |



| DATE (YYYYJJ) | TIME  | Event Lat. | Event Long. | Event depth (km) | Station Lat. | Station Long. | Distance | Azimuth | Back Azimuth | Phi    | dPhi  | Delay Time | d(Delay Time) | Source Polarization | d(Source Polarization) | Station |
|---------------|-------|------------|-------------|------------------|--------------|---------------|----------|---------|--------------|--------|-------|------------|---------------|---------------------|------------------------|---------|
| 2015259       | 08:00 | 1.88       | 126.43      | 41.00            | 46.83        | 9.11          | 106.93   | 320.38  | 68.16        | 33.00  | 7.25  | 1.20       | 0.14          | 65.09               | 0.91                   | PANIX   |
| 2015351       | 20:09 | 15.80      | -93.63      | 85.00            | 46.83        | 9.11          | 87.08    | 42.12   | 289.91       | 62.00  | 9.50  | 1.08       | 0.13          | 111.94              | 0.59                   | PANIX   |
| 2016139       | 08:17 | 0.43       | -79.79      | 16.00            | 46.83        | 9.11          | 88.94    | 43.37   | 269.49       | 56.00  | 5.75  | 1.00       | 0.08          | 95.96               | 0.24                   | PANIX   |
| 2016153       | 23:16 | -2.10      | 100.67      | 50.00            | 46.83        | 9.11          | 92.59    | 316.60  | 90.30        | 50.00  | 2.25  | 1.75       | 0.03          | 94.31               | 0.21                   | PANIX   |
| 2016159       | 19:35 | 1.28       | 126.37      | 31.00            | 46.83        | 9.11          | 107.35   | 320.24  | 68.61        | 49.00  | 6.75  | 1.35       | 0.24          | 73.76               | 1.27                   | PANIX   |
| 2016213       | 11:53 | -56.26     | -27.54      | 99.00            | 46.83        | 9.11          | 107.21   | 25.41   | 200.41       | 60.00  | 7.25  | 1.18       | 0.12          | 204.00              | 1.58                   | PANIX   |
| 2016234       | 04:05 | -55.31     | -31.75      | 12.00            | 46.83        | 9.11          | 107.43   | 28.09   | 203.08       | 49.00  | 8.75  | 1.32       | 0.21          | 200.29              | 0.99                   | PANIX   |
| 2016293       | 00:46 | -4.86      | 108.16      | 614.00           | 46.83        | 9.11          | 99.72    | 316.53  | 86.74        | 51.00  | 7.25  | 1.32       | 0.12          | 91.11               | 0.86                   | PANIX   |
| 2016329       | 19:03 | 11.91      | -88.90      | 10.00            | 46.83        | 9.11          | 86.82    | 42.92   | 283.91       | 52.00  | 8.50  | 1.20       | 0.16          | 107.61              | 0.12                   | PANIX   |
| 2017010       | 06:33 | 4.48       | 122.62      | 627.00           | 46.83        | 9.11          | 102.51   | 319.84  | 69.47        | 31.00  | 4.75  | 1.23       | 0.07          | 68.25               | 0.23                   | PANIX   |
| 2017196       | 12:32 | 0.41       | 121.98      | 113.00           | 46.83        | 9.11          | 105.17   | 319.04  | 72.68        | 49.00  | 6.00  | 1.62       | 0.13          | 80.53               | 0.51                   | PANIX   |
| 2017223       | 05:48 | 14.01      | 120.74      | 172.00           | 46.83        | 9.11          | 94.06    | 320.21  | 64.76        | 44.00  | 12.50 | 1.82       | 0.46          | 67.07               | 1.36                   | PANIX   |
| 2018229       | 15:55 | -7.37      | 119.80      | 529.00           | 46.83        | 9.11          | 109.47   | 317.05  | 79.78        | 68.00  | 14.50 | 1.60       | 0.40          | 93.52               | 1.50                   | PANIX   |
| 2018250       | 02:32 | -2.35      | -78.90      | 93.00            | 46.83        | 9.11          | 90.33    | 43.33   | 266.95       | 61.00  | 5.25  | 1.50       | 0.11          | 96.24               | 0.25                   | PANIX   |
| 2018271       | 10:22 | -0.18      | 119.84      | 10.00            | 46.83        | 9.11          | 104.20   | 318.51  | 74.74        | 51.00  | 5.75  | 1.75       | 0.17          | 80.33               | 0.28                   | PANIX   |
| 2016139       | 08:17 | 0.43       | -79.79      | 16.00            | 46.62        | 10.26         | 89.73    | 43.57   | 270.33       | 73.00  | 26.25 | 1.38       | 0.97          | 88.83               | 3.21                   | FUORN   |
| 2016153       | 23:16 | -2.10      | 100.67      | 50.00            | 46.62        | 10.26         | 91.79    | 316.40  | 91.14        | 78.00  | 10.50 | 2.33       | 0.63          | 93.71               | 0.72                   | FUORN   |
| 2016217       | 16:44 | 24.94      | 142.01      | 510.00           | 46.62        | 10.26         | 96.48    | 328.83  | 42.98        | 71.00  | 9.50  | 0.90       | 0.14          | 218.13              | 0.85                   | FUORN   |
| 2016238       | 17:24 | 30.61      | 137.85      | 456.00           | 46.62        | 10.26         | 89.74    | 326.89  | 43.09        | -85.00 | 6.75  | 0.80       | 0.05          | 43.61               | 0.28                   | FUORN   |
| 2017010       | 06:33 | 4.48       | 122.62      | 627.00           | 46.62        | 10.26         | 101.84   | 319.36  | 70.41        | 53.00  | 6.75  | 0.88       | 0.34          | 63.31               | 0.41                   | FUORN   |
| 2017140       | 01:26 | 9.38       | 123.95      | 533.00           | 46.62        | 10.26         | 98.97    | 320.28  | 66.19        | 45.00  | 11.00 | 0.88       | 0.23          | 63.55               | 0.84                   | FUORN   |
| 2017196       | 12:32 | 0.41       | 121.98      | 113.00           | 46.62        | 10.26         | 104.47   | 318.60  | 73.63        | 49.00  | 5.50  | 1.02       | 0.23          | 63.42               | 0.28                   | FUORN   |
| 2018240       | 22:55 | 16.80      | 146.84      | 55.00            | 46.62        | 10.26         | 105.75   | 330.51  | 43.16        | 81.00  | 8.00  | 0.80       | 0.09          | 224.55              | 0.45                   | FUORN   |
| 2015135       | 20:46 | -2.54      | 102.22      | 151.00           | 47.71        | 8.25          | 94.54    | 317.48  | 88.78        | 56.00  | 5.25  | 1.50       | 0.11          | 88.72               | 0.29                   | METMA   |
| 2015184       | 07:03 | 10.17      | 125.89      | 32.00            | 47.71        | 8.25          | 100.31   | 322.55  | 62.43        | 56.00  | 3.50  | 2.67       | 0.22          | 75.07               | 0.38                   | METMA   |
| 2016211       | 21:38 | 18.54      | 145.51      | 196.00           | 47.71        | 8.25          | 103.74   | 331.85  | 41.52        | 50.00  | 1.00  | 2.10       | 0.17          | 221.02              | 0.11                   | METMA   |
| 2016217       | 14:35 | -22.33     | -66.01      | 270.00           | 47.71        | 8.25          | 96.26    | 40.84   | 243.71       | 47.00  | 27.00 | 2.00       | 0.97          | 57.15               | 2.67                   | METMA   |
| 2016217       | 16:44 | 24.94      | 142.01      | 510.00           | 47.71        | 8.25          | 96.59    | 330.59  | 41.30        | 61.00  | 21.25 | 0.95       | 0.38          | 218.67              | 1.31                   | METMA   |
| 2016238       | 17:24 | 30.61      | 137.85      | 456.00           | 47.71        | 8.25          | 89.85    | 328.64  | 41.63        | 52.00  | 3.50  | 2.05       | 0.36          | 222.88              | 0.58                   | METMA   |
| 2016293       | 00:46 | -4.86      | 108.16      | 614.00           | 47.71        | 8.25          | 100.24   | 317.47  | 85.94        | 49.00  | 14.25 | 1.48       | 0.34          | 81.64               | 1.42                   | METMA   |
| 2017010       | 06:33 | 4.48       | 122.62      | 627.00           | 47.71        | 8.25          | 102.74   | 320.90  | 68.61        | 47.00  | 4.75  | 2.12       | 0.28          | 68.10               | 0.77                   | METMA   |
| 2017140       | 01:26 | 9.38       | 123.95      | 533.00           | 47.71        | 8.25          | 99.76    | 321.87  | 64.46        | 29.00  | 17.00 | 1.07       | 0.22          | 76.74               | 3.74                   | METMA   |
| 2017196       | 12:32 | 0.41       | 121.98      | 113.00           | 47.71        | 8.25          | 105.46   | 320.10  | 71.77        | 22.00  | 27.00 | 1.05       | 0.55          | 64.45               | 1.85                   | METMA   |
| 2015155       | 23:35 | 5.99       | 116.54      | 10.00            | 47.87        | 8.18          | 97.72    | 319.85  | 72.29        | 39.00  | 20.25 | 1.40       | 0.49          | 70.84               | 3.53                   | BERGE   |
| 2015174       | 12:38 | 27.74      | 139.73      | 460.00           | 47.87        | 8.18          | 93.07    | 329.70  | 41.63        | -24.00 | 4.00  | 2.35       | 0.22          | 50.97               | 0.97                   | BERGE   |
| 2015184       | 07:03 | 10.17      | 125.89      | 32.00            | 47.87        | 8.18          | 100.28   | 322.72  | 62.35        | 44.00  | 6.50  | 1.30       | 0.21          | 65.89               | 0.96                   | BERGE   |
| 2015271       | 15:48 | -23.80     | -66.61      | 219.00           | 47.87        | 8.18          | 97.75    | 40.97   | 243.13       | 48.00  | 24.75 | 1.70       | 0.71          | 58.21               | 0.62                   | BERGE   |
| 2015330       | 06:05 | -9.18      | -71.26      | 602.00           | 47.87        | 8.18          | 89.73    | 41.44   | 256.08       | -33.00 | 3.50  | 2.27       | 0.38          | 68.29               | 0.31                   | BERGE   |
| 2016153       | 23:16 | -2.10      | 100.67      | 50.00            | 47.87        | 8.18          | 93.22    | 317.65  | 89.56        | 51.00  | 9.00  | 1.23       | 0.15          | 86.04               | 0.16                   | BERGE   |
| 2016211       | 21:38 | 18.54      | 145.51      | 196.00           | 47.87        | 8.18          | 103.65   | 331.99  | 41.43        | 49.00  | 3.50  | 1.75       | 0.30          | 215.38              | 0.24                   | BERGE   |
| 2016238       | 17:24 | 30.61      | 137.85      | 456.00           | 47.87        | 8.18          | 89.77    | 328.79  | 41.58        | 63.00  | 7.75  | 0.92       | 0.22          | 226.50              | 0.22                   | BERGE   |
| 2017196       | 12:32 | 0.41       | 121.98      | 113.00           | 47.87        | 8.18          | 105.45   | 320.27  | 71.67        | 23.00  | 17.50 | 0.80       | 0.20          | 63.33               | 0.62                   | BERGE   |
| 2017243       | 17:26 | -1.16      | 99.69       | 43.00            | 47.87        | 8.18          | 91.87    | 317.67  | 89.66        | 67.00  | 7.75  | 1.82       | 0.22          | 98.02               | 1.13                   | BERGE   |
| 2018240       | 22:55 | 16.80      | 146.84      | 55.00            | 47.87        | 8.18          | 105.77   | 332.48  | 41.10        | 61.00  | 11.00 | 1.07       | 0.32          | 223.53              | 0.55                   | BERGE   |
| 2018271       | 10:22 | -0.18      | 119.84      | 10.00            | 47.87        | 8.18          | 104.53   | 319.73  | 73.75        | 47.00  | 4.50  | 1.62       | 0.14          | 75.01               | 0.10                   | BERGE   |
| 2015232       | 11:20 | 0.49       | 126.59      | 46.00            | 47.90        | 8.85          | 107.88   | 321.26  | 68.42        | -3.00  | 22.75 | 0.85       | 0.54          | 58.64               | 2.14                   | EMING   |
| 2015259       | 08:00 | 1.88       | 126.43      | 41.00            | 47.90        | 8.85          | 106.70   | 321.48  | 67.65        | 0.00   | 17.75 | 0.92       | 0.30          | 64.89               | 1.37                   | EMING   |

| DATE (YYYYJJ) | TIME  | Event Lat. | Event Long. | Event depth (km) | Station Lat. | Station Long. | Distance | Azimuth | Back Azimuth | Phi    | dPhi  | Delay Time | d(Delay Time) | Source Polarization | d(Source Polarization) | Station |
|---------------|-------|------------|-------------|------------------|--------------|---------------|----------|---------|--------------|--------|-------|------------|---------------|---------------------|------------------------|---------|
| 2016201       | 05:38 | -30.25     | -71.97      | 8.00             | 47.90        | 8.85          | 106.13   | 43.75   | 242.78       | 54.00  | 15.00 | 2.20       | 0.87          | 68.49               | 2.78                   | EMING   |
| 2016207       | 17:46 | -26.11     | -70.51      | 72.00            | 47.90        | 8.85          | 102.24   | 42.59   | 244.72       | 55.00  | 7.00  | 2.05       | 0.41          | 73.21               | 1.87                   | EMING   |
| 2016211       | 21:38 | 18.54      | 145.51      | 196.00           | 47.90        | 8.85          | 103.33   | 331.66  | 42.00        | 65.00  | 2.00  | 2.00       | 0.17          | 229.36              | 0.27                   | EMING   |
| 2016217       | 14:35 | -22.33     | -66.01      | 270.00           | 47.90        | 8.85          | 96.70    | 40.85   | 244.14       | 61.00  | 26.75 | 2.58       | 0.84          | 72.37               | 1.79                   | EMING   |
| 2016244       | 03:31 | -3.68      | 152.79      | 476.00           | 47.90        | 8.85          | 126.16   | 330.62  | 46.68        | 56.00  | 6.50  | 2.10       | 0.71          | 228.93              | 1.42                   | EMING   |
| 2017283       | 06:52 | -18.57     | -69.75      | 85.00            | 47.90        | 8.85          | 96.20    | 41.57   | 249.28       | 60.00  | 3.25  | 1.70       | 0.24          | 73.87               | 0.77                   | EMING   |
| 2017349       | 17:07 | -7.49      | 108.17      | 90.00            | 47.90        | 8.85          | 101.76   | 317.29  | 88.15        | 47.00  | 3.25  | 1.27       | 0.04          | 93.80               | 0.69                   | EMING   |
| 2018221       | 05:45 | -8.31      | 116.23      | 15.00            | 47.90        | 8.85          | 107.77   | 317.59  | 82.64        | 24.00  | 3.50  | 0.95       | 0.04          | 77.21               | 0.20                   | EMING   |
| 2018236       | 09:24 | -11.04     | -70.83      | 630.00           | 47.90        | 8.85          | 91.28    | 41.47   | 255.03       | 62.00  | 7.00  | 1.45       | 0.22          | 84.52               | 0.71                   | EMING   |
| 2018240       | 22:55 | 16.80      | 146.84      | 55.00            | 47.90        | 8.85          | 105.46   | 332.14  | 41.69        | 68.00  | 3.25  | 1.85       | 0.14          | 230.23              | 0.67                   | EMING   |
| 2018251       | 07:36 | 7.24       | 126.48      | 10.00            | 47.90        | 8.85          | 102.54   | 322.36  | 64.22        | 64.00  | 4.25  | 1.50       | 0.82          | 73.69               | 0.76                   | EMING   |
| 2018271       | 10:22 | -0.18      | 119.84      | 10.00            | 47.90        | 8.85          | 104.09   | 319.63  | 74.27        | 67.00  | 2.75  | 1.92       | 0.18          | 85.41               | 0.25                   | EMING   |
| 2016153       | 23:16 | -2.10      | 100.67      | 50.00            | 47.75        | 9.12          | 92.58    | 317.53  | 90.27        | 43.00  | 2.25  | 2.02       | 0.04          | 95.95               | 0.11                   | WALHA   |
| 2016207       | 17:46 | -26.11     | -70.51      | 72.00            | 47.75        | 9.12          | 102.35   | 42.81   | 244.87       | 53.00  | 5.75  | 3.30       | 0.35          | 71.58               | 1.64                   | WALHA   |
| 2016211       | 21:38 | 18.54      | 145.51      | 196.00           | 47.75        | 9.12          | 103.31   | 331.42  | 42.26        | 51.00  | 2.50  | 2.75       | 0.17          | 212.85              | 0.31                   | WALHA   |
| 2016238       | 17:24 | 30.61      | 137.85      | 456.00           | 47.75        | 9.12          | 89.43    | 328.23  | 42.27        | 71.00  | 4.75  | 1.70       | 0.17          | 231.73              | 0.81                   | WALHA   |
| 2017105       | 08:39 | -23.27     | -67.72      | 155.00           | 47.75        | 9.12          | 98.55    | 41.64   | 244.90       | 53.00  | 4.50  | 3.30       | 0.34          | 67.67               | 1.48                   | WALHA   |
| 2017196       | 12:32 | 0.41       | 121.98      | 113.00           | 47.75        | 9.12          | 104.88   | 319.95  | 72.45        | 44.00  | 3.75  | 1.97       | 0.07          | 75.12               | 0.75                   | WALHA   |
| 2017263       | 16:57 | 37.98      | 144.66      | 11.00            | 47.75        | 9.12          | 85.89    | 331.71  | 33.71        | 66.00  | 7.00  | 1.82       | 0.26          | 220.61              | 1.33                   | WALHA   |
| 2018236       | 09:24 | -11.04     | -70.83      | 630.00           | 47.75        | 9.12          | 91.42    | 41.66   | 255.23       | 54.00  | 11.25 | 2.35       | 0.40          | 77.48               | 1.42                   | WALHA   |
| 2018250       | 02:32 | -2.35      | -78.90      | 93.00            | 47.75        | 9.12          | 90.39    | 42.41   | 266.97       | 58.00  | 5.25  | 1.82       | 0.21          | 82.69               | 0.49                   | WALHA   |
| 2016211       | 21:38 | 18.54      | 145.51      | 196.00           | 49.85        | 10.21         | 101.28   | 332.33  | 42.88        | 72.00  | 8.00  | 1.00       | 0.12          | 218.93              | 0.40                   | A111A   |
| 2016217       | 16:44 | 24.94      | 142.01      | 510.00           | 49.85        | 10.21         | 94.13    | 331.06  | 42.73        | 84.00  | 3.25  | 0.90       | 0.02          | 226.36              | 0.17                   | A111A   |
| 2016238       | 17:24 | 30.61      | 137.85      | 456.00           | 49.85        | 10.21         | 87.40    | 329.13  | 43.11        | -83.00 | 12.50 | 0.70       | 0.11          | 54.60               | 0.73                   | A111A   |
| 2017010       | 06:33 | 4.48       | 122.62      | 627.00           | 49.85        | 10.21         | 100.77   | 322.47  | 69.76        | 65.00  | 4.25  | 3.12       | 0.64          | 236.11              | 0.32                   | A111A   |
| 2017049       | 12:30 | -23.86     | -66.66      | 222.00           | 49.85        | 10.21         | 99.90    | 39.79   | 244.84       | 70.00  | 3.50  | 1.80       | 0.52          | 243.88              | 0.27                   | A111A   |
| 2015351       | 20:09 | 15.80      | -93.63      | 85.00            | 49.65        | 7.91          | 85.38    | 39.71   | 288.86       | -82.00 | 15.25 | 1.10       | 0.36          | 301.00              | 0.45                   | A112A   |
| 2016153       | 23:16 | -2.10      | 100.67      | 50.00            | 49.65        | 7.91          | 93.38    | 319.43  | 89.26        | 64.00  | 3.00  | 1.82       | 0.06          | 101.02              | 0.26                   | A112A   |
| 2016159       | 11:11 | 18.36      | -105.17     | 10.00            | 49.65        | 7.91          | 90.23    | 36.72   | 299.11       | 36.00  | 6.00  | 3.00       | 0.57          | 109.52              | 0.59                   | A112A   |
| 2016211       | 21:38 | 18.54      | 145.51      | 196.00           | 49.65        | 7.91          | 102.43   | 333.33  | 40.93        | 65.00  | 2.00  | 1.70       | 0.09          | 222.57              | 0.17                   | A112A   |
| 2016217       | 16:44 | 24.94      | 142.01      | 510.00           | 49.65        | 7.91          | 95.28    | 332.05  | 40.90        | 68.00  | 4.00  | 1.82       | 0.16          | 229.93              | 0.26                   | A112A   |
| 2016238       | 17:24 | 30.61      | 137.85      | 456.00           | 49.65        | 7.91          | 88.55    | 330.10  | 41.39        | 68.00  | 3.75  | 1.70       | 0.12          | 226.32              | 0.32                   | A112A   |
| 2016211       | 21:38 | 18.54      | 145.51      | 196.00           | 49.55        | 8.73          | 102.15   | 332.85  | 41.65        | 63.00  | 3.50  | 1.25       | 0.13          | 221.83              | 0.10                   | A113A   |
| 2016217       | 16:44 | 24.94      | 142.01      | 510.00           | 49.55        | 8.73          | 95.00    | 331.58  | 41.56        | 63.00  | 2.75  | 1.45       | 0.11          | 222.95              | 0.29                   | A113A   |
| 2016238       | 17:24 | 30.61      | 137.85      | 456.00           | 49.55        | 8.73          | 88.27    | 329.63  | 42.00        | 64.00  | 3.50  | 1.57       | 0.16          | 225.44              | 0.46                   | A113A   |
| 2016293       | 00:46 | -4.86      | 108.16      | 614.00           | 49.55        | 8.73          | 99.80    | 319.30  | 85.98        | 35.00  | 9.50  | 1.40       | 0.18          | 83.71               | 1.00                   | A113A   |
| 2017196       | 12:32 | 0.41       | 121.98      | 113.00           | 49.55        | 8.73          | 104.58   | 321.80  | 71.68        | -10.00 | 12.50 | 0.97       | 0.33          | 61.31               | 0.84                   | A113A   |
| 2016153       | 23:16 | -2.10      | 100.67      | 50.00            | 49.59        | 9.18          | 92.55    | 319.37  | 90.23        | 52.00  | 3.00  | 1.52       | 0.06          | 86.56               | 0.31                   | A114A   |
| 2016217       | 16:44 | 24.94      | 142.01      | 510.00           | 49.59        | 9.18          | 94.77    | 331.38  | 41.92        | 58.00  | 1.25  | 1.02       | 0.04          | 219.32              | 0.06                   | A114A   |
| 2016238       | 17:24 | 30.61      | 137.85      | 456.00           | 49.59        | 9.18          | 88.04    | 329.44  | 42.34        | 52.00  | 4.50  | 1.25       | 0.19          | 214.16              | 0.42                   | A114A   |
| 2017196       | 12:32 | 0.41       | 121.98      | 113.00           | 49.59        | 9.18          | 104.29   | 321.75  | 72.04        | 59.00  | 4.00  | 1.90       | 0.19          | 78.69               | 0.22                   | A114A   |
| 2016153       | 23:16 | -2.10      | 100.67      | 50.00            | 49.27        | 9.05          | 92.64    | 319.05  | 90.14        | 49.00  | 20.75 | 1.52       | 0.35          | 84.14               | 1.03                   | A115A   |
| 2016211       | 21:38 | 18.54      | 145.51      | 196.00           | 49.27        | 9.05          | 102.22   | 332.51  | 41.97        | 61.00  | 1.25  | 1.77       | 0.04          | 216.73              | 0.11                   | A115A   |
| 2016217       | 16:44 | 24.94      | 142.01      | 510.00           | 49.27        | 9.05          | 95.07    | 331.24  | 41.84        | 58.00  | 3.50  | 1.88       | 0.15          | 219.49              | 0.30                   | A115A   |
| 2016238       | 17:24 | 30.61      | 137.85      | 456.00           | 49.27        | 9.05          | 88.33    | 329.29  | 42.24        | 64.00  | 5.50  | 1.77       | 0.24          | 226.56              | 1.13                   | A115A   |
| 2016293       | 00:46 | -4.86      | 108.16      | 614.00           | 49.27        | 9.05          | 99.61    | 319.01  | 86.27        | 45.00  | 16.50 | 1.57       | 0.37          | 78.06               | 1.98                   | A115A   |
| 2018014       | 09:38 | -15.77     | -74.71      | 39.00            | 49.27        | 9.05          | 97.79    | 41.08   | 255.03       | 55.00  | 8.75  | 1.70       | 0.54          | 73.09               | 0.46                   | A115A   |



| DATE (YYYYJJ) | TIME  | Event Lat. | Event Long. | Event depth (km) | Station Lat. | Station Long. | Distance | Azimuth | Back Azimuth | Phi    | dPhi  | Delay Time | d(Delay Time) | Source Polarization | d(Source Polarization) | Station |
|---------------|-------|------------|-------------|------------------|--------------|---------------|----------|---------|--------------|--------|-------|------------|---------------|---------------------|------------------------|---------|
| 2016211       | 21:38 | 18.54      | 145.51      | 196.00           | 49.40        | 9.48          | 101.93   | 332.38  | 42.32        | 60.00  | 11.25 | 1.20       | 0.31          | 217.00              | 0.53                   | A116A   |
| 2016217       | 16:44 | 24.94      | 142.01      | 510.00           | 49.40        | 9.48          | 94.79    | 331.11  | 42.17        | 56.00  | 4.50  | 1.48       | 0.19          | 218.75              | 0.34                   | A116A   |
| 2016238       | 17:24 | 30.61      | 137.85      | 456.00           | 49.40        | 9.48          | 88.05    | 329.17  | 42.56        | 56.00  | 6.25  | 1.65       | 0.28          | 219.25              | 0.49                   | A116A   |
| 2017010       | 06:33 | 4.48       | 122.62      | 627.00           | 49.40        | 9.48          | 101.37   | 322.21  | 69.25        | 59.00  | 3.75  | 2.72       | 0.59          | 67.96               | 0.83                   | A116A   |
| 2017052       | 14:29 | -19.28     | -63.90      | 595.00           | 49.40        | 9.48          | 94.13    | 38.88   | 245.16       | 5.00   | 21.00 | 0.85       | 0.34          | 56.36               | 1.40                   | A116A   |
| 2017196       | 12:32 | 0.41       | 121.98      | 113.00           | 49.40        | 9.48          | 104.16   | 321.50  | 72.33        | 45.00  | 21.25 | 0.70       | 0.33          | 80.90               | 1.98                   | A116A   |
| 2018014       | 09:38 | -15.77     | -74.71      | 39.00            | 49.40        | 9.48          | 98.10    | 41.03   | 255.36       | 61.00  | 21.50 | 1.25       | 0.67          | 85.64               | 1.41                   | A116A   |
| 2015351       | 20:09 | 15.80      | -93.63      | 85.00            | 49.04        | 9.57          | 86.61    | 39.92   | 290.13       | 33.00  | 4.75  | 1.62       | 0.28          | 104.68              | 0.51                   | A117A   |
| 2016153       | 23:16 | -2.10      | 100.67      | 50.00            | 49.04        | 9.57          | 92.30    | 318.82  | 90.54        | 49.00  | 4.50  | 1.17       | 0.06          | 85.39               | 0.20                   | A117A   |
| 2016159       | 11:11 | 18.36      | -105.17     | 10.00            | 49.04        | 9.57          | 91.48    | 36.71   | 300.36       | 41.00  | 3.75  | 1.42       | 0.21          | 114.42              | 0.17                   | A117A   |
| 2016211       | 21:38 | 18.54      | 145.51      | 196.00           | 49.04        | 9.57          | 102.16   | 332.09  | 42.45        | 64.00  | 2.50  | 1.55       | 0.07          | 216.51              | 0.11                   | A117A   |
| 2016217       | 16:44 | 24.94      | 142.01      | 510.00           | 49.04        | 9.57          | 95.01    | 330.83  | 42.26        | 69.00  | 2.50  | 1.52       | 0.07          | 222.51              | 0.48                   | A117A   |
| 2016238       | 17:24 | 30.61      | 137.85      | 456.00           | 49.04        | 9.57          | 88.28    | 328.89  | 42.62        | 74.00  | 7.00  | 1.40       | 0.19          | 230.73              | 0.62                   | A117A   |
| 2016293       | 00:46 | -4.86      | 108.16      | 614.00           | 49.04        | 9.57          | 99.28    | 318.76  | 86.71        | 56.00  | 23.25 | 1.35       | 0.48          | 84.16               | 1.42                   | A117A   |
| 2017140       | 01:26 | 9.38       | 123.95      | 533.00           | 49.04        | 9.57          | 98.40    | 322.71  | 65.31        | 69.00  | 23.25 | 1.45       | 0.57          | 72.11               | 0.69                   | A117A   |
| 2017243       | 17:26 | -1.16      | 99.69       | 43.00            | 49.04        | 9.57          | 90.95    | 318.85  | 90.67        | 79.00  | 4.50  | 2.50       | 0.22          | 101.83              | 1.14                   | A117A   |
| 2017297       | 11:07 | -7.22      | 123.07      | 553.00           | 49.04        | 9.57          | 110.75   | 319.81  | 76.66        | 45.00  | 9.50  | 0.80       | 0.13          | 77.86               | 0.83                   | A117A   |
| 2015351       | 20:09 | 15.80      | -93.63      | 85.00            | 48.73        | 10.30         | 87.17    | 40.05   | 290.69       | 50.00  | 6.75  | 1.17       | 0.13          | 107.64              | 0.22                   | A360A   |
| 2016153       | 23:16 | -2.10      | 100.67      | 50.00            | 48.73        | 10.30         | 91.81    | 318.51  | 91.10        | 73.00  | 19.00 | 1.62       | 0.49          | 96.09               | 0.58                   | A360A   |
| 2016211       | 21:38 | 18.54      | 145.51      | 196.00           | 48.73        | 10.30         | 102.06   | 331.51  | 43.11        | -79.00 | 5.00  | 1.15       | 0.07          | 47.75               | 0.55                   | A360A   |
| 2016217       | 16:44 | 24.94      | 142.01      | 510.00           | 48.73        | 10.30         | 94.92    | 330.26  | 42.86        | 73.00  | 5.75  | 1.38       | 0.10          | 212.28              | 0.95                   | A360A   |
| 2016238       | 17:24 | 30.61      | 137.85      | 456.00           | 48.73        | 10.30         | 88.18    | 328.32  | 43.14        | 69.00  | 3.00  | 1.07       | 0.06          | 220.29              | 0.15                   | A360A   |
| 2017243       | 17:26 | -1.16      | 99.69       | 43.00            | 48.73        | 10.30         | 90.46    | 318.54  | 91.22        | 65.00  | 16.25 | 1.30       | 0.38          | 89.37               | 1.22                   | A360A   |
| 2016153       | 23:16 | -2.10      | 100.67      | 50.00            | 48.36        | 10.40         | 91.73    | 318.15  | 91.19        | 33.00  | 7.75  | 0.97       | 0.10          | 85.26               | 0.35                   | A362A   |
| 2016211       | 21:38 | 18.54      | 145.51      | 196.00           | 48.36        | 10.40         | 102.28   | 331.20  | 43.26        | 46.00  | 2.75  | 1.75       | 0.17          | 208.94              | 0.27                   | A362A   |
| 2016238       | 17:24 | 30.61      | 137.85      | 456.00           | 48.36        | 10.40         | 88.40    | 328.02  | 43.21        | 50.00  | 10.25 | 1.10       | 0.32          | 213.19              | 1.27                   | A362A   |
| 2015351       | 20:09 | 15.80      | -93.63      | 85.00            | 48.52        | 10.93         | 87.64    | 40.09   | 291.16       | -87.00 | 15.50 | 1.45       | 0.44          | 289.59              | 0.26                   | A363A   |
| 2016153       | 23:16 | -2.10      | 100.67      | 50.00            | 48.52        | 10.93         | 91.38    | 318.32  | 91.58        | 67.00  | 3.00  | 1.32       | 0.07          | 96.32               | 0.23                   | A363A   |
| 2016211       | 21:38 | 18.54      | 145.51      | 196.00           | 48.52        | 10.93         | 101.92   | 331.05  | 43.69        | -82.00 | 7.00  | 1.17       | 0.09          | 48.14               | 0.68                   | A363A   |
| 2016217       | 16:44 | 24.94      | 142.01      | 510.00           | 48.52        | 10.93         | 94.78    | 329.81  | 43.37        | -84.00 | 14.25 | 0.97       | 0.16          | 53.82               | 1.40                   | A363A   |
| 2016238       | 17:24 | 30.61      | 137.85      | 456.00           | 48.52        | 10.93         | 88.04    | 327.87  | 43.61        | -84.00 | 7.50  | 1.02       | 0.08          | 48.20               | 1.13                   | A363A   |
| 2017049       | 12:30 | -23.86     | -66.66      | 222.00           | 48.52        | 10.93         | 99.77    | 41.21   | 245.14       | 51.00  | 9.25  | 0.77       | 0.24          | 66.81               | 0.29                   | A363A   |
| 2017140       | 01:26 | 9.38       | 123.95      | 533.00           | 48.52        | 10.93         | 97.79    | 321.86  | 66.45        | 76.00  | 2.75  | 1.23       | 0.17          | 245.55              | 0.12                   | A363A   |
| 2017223       | 05:48 | 14.01      | 120.74      | 172.00           | 48.52        | 10.93         | 92.23    | 321.25  | 66.05        | 79.00  | 23.25 | 0.38       | 0.99          | 246.40              | 0.69                   | A363A   |
| 2017283       | 06:52 | -18.57     | -69.75      | 85.00            | 48.52        | 10.93         | 97.72    | 41.46   | 250.84       | 43.00  | 16.75 | 0.50       | 0.20          | 73.38               | 0.50                   | A363A   |
| 2015351       | 20:09 | 15.80      | -93.63      | 85.00            | 48.50        | 11.45         | 87.97    | 39.98   | 291.55       | 60.00  | 13.75 | 0.77       | 0.12          | 104.14              | 0.33                   | A364A   |
| 2017196       | 12:32 | 0.41       | 121.98      | 113.00           | 48.50        | 11.45         | 103.17   | 320.23  | 74.11        | 66.00  | 17.50 | 0.80       | 0.28          | 78.96               | 0.14                   | A364A   |
| 2016139       | 08:17 | 0.43       | -79.79      | 16.00            | 48.17        | 10.73         | 90.03    | 42.02   | 270.67       | 21.00  | 12.75 | 0.82       | 0.23          | 85.89               | 0.79                   | A365A   |
| 2016153       | 23:16 | -2.10      | 100.67      | 50.00            | 48.17        | 10.73         | 91.51    | 317.96  | 91.44        | 36.00  | 2.50  | 1.35       | 0.03          | 83.85               | 0.19                   | A365A   |
| 2016207       | 17:46 | -26.11     | -70.51      | 72.00            | 48.17        | 10.73         | 103.50   | 42.88   | 246.05       | -12.00 | 11.75 | 0.97       | 0.24          | 53.43               | 0.25                   | A365A   |
| 2016211       | 21:38 | 18.54      | 145.51      | 196.00           | 48.17        | 10.73         | 102.27   | 330.90  | 43.57        | 53.00  | 5.25  | 1.62       | 0.25          | 213.43              | 0.43                   | A365A   |
| 2016238       | 17:24 | 30.61      | 137.85      | 456.00           | 48.17        | 10.73         | 88.39    | 327.72  | 43.45        | 53.00  | 8.50  | 1.65       | 0.25          | 209.49              | 1.14                   | A365A   |
| 2016293       | 00:46 | -4.86      | 108.16      | 614.00           | 48.17        | 10.73         | 98.55    | 317.83  | 87.72        | 50.00  | 12.75 | 0.88       | 0.17          | 86.14               | 0.97                   | A365A   |
| 2017010       | 06:33 | 4.48       | 122.62      | 627.00           | 48.17        | 10.73         | 101.02   | 320.74  | 70.48        | 13.00  | 7.25  | 1.15       | 0.11          | 57.44               | 1.14                   | A365A   |
| 2016159       | 11:11 | 18.36      | -105.17     | 10.00            | 47.83        | 10.62         | 92.70    | 37.40   | 301.12       | 53.00  | 7.00  | 1.17       | 0.40          | 133.87              | 0.28                   | A366A   |
| 2016217       | 14:35 | -22.33     | -66.01      | 270.00           | 47.83        | 10.62         | 97.75    | 41.42   | 245.39       | 4.00   | 10.00 | 1.72       | 0.49          | 75.27               | 2.13                   | A366A   |
| 2016217       | 16:44 | 24.94      | 142.01      | 510.00           | 47.83        | 10.62         | 95.42    | 329.48  | 43.17        | 82.00  | 8.50  | 1.00       | 0.19          | 236.31              | 0.74                   | A366A   |

| DATE (YYYYJJ) | TIME  | Event Lat. | Event Long. | Event depth (km) | Station Lat. | Station Long. | Distance | Azimuth | Back Azimuth | Phi   | dPhi  | Delay Time | d(Delay Time) | Source Polarization | d(Source Polarization) | Station |
|---------------|-------|------------|-------------|------------------|--------------|---------------|----------|---------|--------------|-------|-------|------------|---------------|---------------------|------------------------|---------|
| 2016238       | 17:24 | 30.61      | 137.85      | 456.00           | 47.83        | 10.62         | 88.68    | 327.55  | 43.37        | 78.00 | 9.00  | 1.48       | 0.79          | 238.46              | 2.25                   | A366A   |
| 2017010       | 06:33 | 4.48       | 122.62      | 627.00           | 47.83        | 10.62         | 101.20   | 320.44  | 70.45        | -7.00 | 24.00 | 3.05       | 0.91          | 70.65               | 2.17                   | A366A   |
| 2017049       | 12:30 | -23.86     | -66.66      | 222.00           | 47.83        | 10.62         | 99.29    | 41.76   | 244.82       | 61.00 | 9.75  | 1.77       | 0.59          | 78.65               | 1.67                   | A366A   |
| 2017196       | 12:32 | 0.41       | 121.98      | 113.00           | 47.83        | 10.62         | 103.89   | 319.73  | 73.61        | 55.00 | 10.00 | 1.25       | 0.18          | 86.61               | 0.84                   | A366A   |
| 2016153       | 23:16 | -2.10      | 100.67      | 50.00            | 48.31        | 11.92         | 90.72    | 318.12  | 92.33        | 73.00 | 8.25  | 1.05       | 0.19          | 97.16               | 0.19                   | A367A   |
| 2016207       | 17:46 | -26.11     | -70.51      | 72.00            | 48.31        | 11.92         | 104.29   | 43.07   | 246.89       | 70.00 | 0.50  | 1.82       | 0.66          | 72.01               | 0.05                   | A367A   |
| 2016211       | 21:38 | 18.54      | 145.51      | 196.00           | 48.31        | 11.92         | 101.62   | 330.42  | 44.55        | 77.00 | 1.75  | 1.50       | 0.04          | 227.83              | 0.07                   | A367A   |
| 2016238       | 17:24 | 30.61      | 137.85      | 456.00           | 48.31        | 11.92         | 87.74    | 327.24  | 44.32        | 77.00 | 4.50  | 1.55       | 0.06          | 224.13              | 0.43                   | A367A   |
| 2016153       | 23:16 | -2.10      | 100.67      | 50.00            | 49.13        | 10.55         | 91.65    | 318.91  | 91.28        | 51.00 | 7.25  | 0.77       | 0.08          | 83.84               | 0.12                   | A368A   |
| 2016159       | 11:11 | 18.36      | -105.17     | 10.00            | 49.13        | 10.55         | 91.99    | 36.31   | 301.11       | 33.00 | 3.00  | 1.20       | 0.16          | 106.75              | 0.05                   | A368A   |
| 2016211       | 21:38 | 18.54      | 145.51      | 196.00           | 49.13        | 10.55         | 101.66   | 331.67  | 43.27        | 66.00 | 11.50 | 1.35       | 0.25          | 212.34              | 0.91                   | A368A   |
| 2016217       | 16:44 | 24.94      | 142.01      | 510.00           | 49.13        | 10.55         | 94.51    | 330.41  | 43.03        | 71.00 | 7.25  | 1.15       | 0.14          | 218.19              | 0.66                   | A368A   |
| 2016238       | 17:24 | 30.61      | 137.85      | 456.00           | 49.13        | 10.55         | 87.78    | 328.47  | 43.34        | 66.00 | 4.25  | 1.45       | 0.09          | 210.52              | 0.61                   | A368A   |
| 2016293       | 00:46 | -4.86      | 108.16      | 614.00           | 49.13        | 10.55         | 98.64    | 318.81  | 87.43        | 48.00 | 14.50 | 0.95       | 0.29          | 75.43               | 1.34                   | A368A   |
| 2016153       | 23:16 | -2.10      | 100.67      | 50.00            | 49.12        | 11.02         | 91.34    | 318.91  | 91.64        | 84.00 | 3.50  | 1.70       | 0.21          | 100.00              | 0.15                   | A369A   |
| 2016159       | 11:11 | 18.36      | -105.17     | 10.00            | 49.12        | 11.02         | 92.26    | 36.16   | 301.47       | 43.00 | 17.50 | 0.92       | 0.29          | 118.36              | 0.18                   | A369A   |
| 2016211       | 21:38 | 18.54      | 145.51      | 196.00           | 49.12        | 11.02         | 101.45   | 331.43  | 43.68        | 87.00 | 12.25 | 1.38       | 0.17          | 221.88              | 0.54                   | A369A   |
| 2016238       | 17:24 | 30.61      | 137.85      | 456.00           | 49.12        | 11.02         | 87.57    | 328.24  | 43.69        | 75.00 | 13.25 | 1.25       | 0.21          | 214.48              | 1.27                   | A369A   |
| 2016264       | 16:41 | 30.50      | 142.05      | 9.00             | 49.12        | 11.02         | 89.52    | 330.29  | 40.63        | 83.00 | 6.00  | 1.52       | 0.11          | 227.92              | 1.34                   | A369A   |
| 2017049       | 12:30 | -23.86     | -66.66      | 222.00           | 49.12        | 11.02         | 100.07   | 40.69   | 245.29       | 70.00 | 2.00  | 1.85       | 0.17          | 237.27              | 0.12                   | A369A   |
| 2017105       | 08:39 | -23.27     | -67.72      | 155.00           | 49.12        | 11.02         | 100.26   | 40.91   | 246.43       | 72.00 | 3.00  | 1.52       | 0.39          | 244.93              | 0.13                   | A369A   |
| 2017243       | 17:26 | -1.16      | 99.69       | 43.00            | 49.12        | 11.02         | 89.99    | 318.94  | 91.76        | 81.00 | 13.00 | 1.55       | 0.54          | 93.79               | 0.95                   | A369A   |
| 2015135       | 20:46 | -2.54      | 102.22      | 151.00           | 48.33        | 8.33          | 94.47    | 318.10  | 88.79        | 33.00 | 18.50 | 1.80       | 0.44          | 89.03               | 1.38                   | BFO     |
| 2016153       | 23:16 | -2.10      | 100.67      | 50.00            | 48.33        | 8.33          | 93.11    | 318.11  | 89.65        | 27.00 | 2.00  | 1.55       | 0.06          | 90.32               | 0.18                   | BFO     |
| 2016211       | 21:38 | 18.54      | 145.51      | 196.00           | 48.33        | 8.33          | 103.24   | 332.23  | 41.49        | 62.00 | 4.50  | 2.02       | 0.34          | 223.81              | 0.43                   | BFO     |
| 2016238       | 17:24 | 30.61      | 137.85      | 456.00           | 48.33        | 8.33          | 89.36    | 329.02  | 41.69        | 70.00 | 2.25  | 1.23       | 0.09          | 235.06              | 0.09                   | BFO     |
| 2017140       | 01:26 | 9.38       | 123.95      | 533.00           | 48.33        | 8.33          | 99.45    | 322.41  | 64.42        | 40.00 | 25.50 | 0.82       | 0.93          | 64.47               | 1.35                   | BFO     |
| 2017196       | 12:32 | 0.41       | 121.98      | 113.00           | 48.33        | 8.33          | 105.21   | 320.69  | 71.67        | 39.00 | 15.50 | 0.82       | 0.19          | 86.37               | 1.41                   | BFO     |
| 2017243       | 17:26 | -1.16      | 99.69       | 43.00            | 48.33        | 8.33          | 91.77    | 318.13  | 89.76        | 59.00 | 12.50 | 1.00       | 0.14          | 102.61              | 0.41                   | BFO     |
| 2015135       | 20:46 | -2.54      | 102.22      | 151.00           | 47.68        | 10.11         | 93.29    | 317.44  | 90.15        | 65.00 | 22.75 | 0.82       | 0.26          | 103.46              | 1.10                   | UBR     |
| 2015155       | 23:35 | 5.99       | 116.54      | 10.00            | 47.68        | 10.11         | 96.53    | 319.28  | 73.78        | 30.00 | 9.00  | 1.42       | 0.12          | 76.23               | 0.79                   | UBR     |
| 2015232       | 11:20 | 0.49       | 126.59      | 46.00            | 47.68        | 10.11         | 107.16   | 320.73  | 69.51        | 53.00 | 1.50  | 1.30       | 0.04          | 79.87               | 0.11                   | UBR     |
| 2015259       | 08:00 | 1.88       | 126.43      | 41.00            | 47.68        | 10.11         | 105.99   | 320.95  | 68.73        | 56.00 | 4.00  | 2.17       | 0.13          | 82.68               | 0.70                   | UBR     |
| 2015351       | 20:09 | 15.80      | -93.63      | 85.00            | 47.68        | 10.11         | 87.42    | 41.08   | 290.59       | 48.00 | 4.00  | 1.67       | 0.18          | 116.00              | 0.24                   | UBR     |
| 2016153       | 23:16 | -2.10      | 100.67      | 50.00            | 47.68        | 10.11         | 91.92    | 317.46  | 91.00        | 62.00 | 8.75  | 1.72       | 0.14          | 104.22              | 0.47                   | UBR     |
| 2016159       | 19:35 | 1.28       | 126.37      | 31.00            | 47.68        | 10.11         | 106.41   | 320.82  | 69.17        | 22.00 | 18.00 | 1.00       | 0.36          | 73.99               | 2.16                   | UBR     |
| 2016207       | 17:46 | -26.11     | -70.51      | 72.00            | 47.68        | 10.11         | 102.92   | 43.16   | 245.52       | 66.00 | 4.25  | 3.00       | 0.39          | 81.45               | 1.55                   | UBR     |
| 2016211       | 21:38 | 18.54      | 145.51      | 196.00           | 47.68        | 10.11         | 102.92   | 330.87  | 43.11        | 65.00 | 3.00  | 2.30       | 0.28          | 231.81              | 0.31                   | UBR     |
| 2016217       | 16:44 | 24.94      | 142.01      | 510.00           | 47.68        | 10.11         | 95.77    | 329.64  | 42.77        | 67.00 | 5.75  | 2.55       | 0.31          | 231.32              | 0.98                   | UBR     |
| 2016293       | 00:46 | -4.86      | 108.16      | 614.00           | 47.68        | 10.11         | 99.00    | 317.36  | 87.33        | 32.00 | 10.50 | 1.32       | 0.27          | 93.63               | 0.87                   | UBR     |
| 2017010       | 06:33 | 4.48       | 122.62      | 627.00           | 47.68        | 10.11         | 101.58   | 320.42  | 70.08        | 49.00 | 22.00 | 1.45       | 0.61          | 75.62               | 3.28                   | UBR     |
| 2017049       | 12:30 | -23.86     | -66.66      | 222.00           | 47.68        | 10.11         | 98.91    | 41.75   | 244.44       | 31.00 | 18.00 | 1.30       | 0.46          | 64.00               | 2.88                   | UBR     |
| 2017052       | 14:29 | -19.28     | -63.90      | 595.00           | 47.68        | 10.11         | 93.79    | 40.62   | 245.51       | -3.00 | 32.00 | 1.75       | 0.86          | 60.91               | 2.86                   | UBR     |
| 2017105       | 08:39 | -23.27     | -67.72      | 155.00           | 47.68        | 10.11         | 99.12    | 41.99   | 245.57       | 69.00 | 3.00  | 2.67       | 0.41          | 80.15               | 0.64                   | UBR     |
| 2017196       | 12:32 | 0.41       | 121.98      | 113.00           | 47.68        | 10.11         | 104.27   | 319.68  | 73.24        | 55.00 | 8.25  | 1.67       | 0.16          | 87.27               | 0.84                   | UBR     |
| 2017283       | 06:52 | -18.57     | -69.75      | 85.00            | 47.68        | 10.11         | 96.92    | 42.07   | 250.15       | 65.00 | 10.75 | 1.75       | 0.57          | 83.93               | 1.17                   | UBR     |
| 2018229       | 15:55 | -7.37      | 119.80      | 529.00           | 47.68        | 10.11         | 108.65   | 317.82  | 80.26        | 18.00 | 11.25 | 1.67       | 0.34          | 83.06               | 0.40                   | UBR     |

| DATE (YYYYJJ) | TIME  | Event Lat. | Event Long. | Event depth (km) | Station Lat. | Station Long. | Distance | Azimuth | Back Azimuth | Phi    | dPhi  | Delay Time | d(Delay Time) | Source Polarization | d(Source Polarization) | Station |
|---------------|-------|------------|-------------|------------------|--------------|---------------|----------|---------|--------------|--------|-------|------------|---------------|---------------------|------------------------|---------|
| 2018240       | 22:55 | 16.80      | 146.84      | 55.00            | 47.68        | 10.11         | 105.04   | 331.34  | 42.83        | 60.00  | 27.00 | 2.00       | 0.64          | 228.53              | 1.59                   | UBR     |
| 2018250       | 02:32 | -2.35      | -78.90      | 93.00            | 47.68        | 10.11         | 91.05    | 42.51   | 267.69       | 52.00  | 14.25 | 1.48       | 0.28          | 99.38               | 1.32                   | UBR     |
| 2018271       | 10:22 | -0.18      | 119.84      | 10.00            | 47.68        | 10.11         | 103.32   | 319.18  | 75.31        | 59.00  | 5.50  | 1.90       | 0.19          | 87.44               | 0.26                   | UBR     |
| 2018231       | 04:30 | -8.34      | 116.60      | 16.00            | 49.22        | 8.18          | 108.29   | 319.07  | 81.43        | 70.00  | 8.50  | 3.22       | 0.27          | 85.49               | 0.69                   | TMO22   |
| 2018250       | 02:32 | -2.35      | -78.90      | 93.00            | 49.22        | 8.18          | 89.85    | 40.91   | 266.27       | 64.00  | 19.25 | 0.70       | 0.24          | 93.01               | 0.93                   | TMO22   |
| 2015232       | 11:20 | 0.49       | 126.59      | 46.00            | 49.83        | 9.29          | 106.89   | 323.03  | 68.23        | 19.00  | 14.50 | 0.52       | 0.14          | 73.50               | 1.04                   | MILB    |
| 2016153       | 23:16 | -2.10      | 100.67      | 50.00            | 49.83        | 9.29          | 92.48    | 319.61  | 90.30        | 68.00  | 16.25 | 1.35       | 0.31          | 100.93              | 1.00                   | MILB    |
| 2016211       | 21:38 | 18.54      | 145.51      | 196.00           | 49.83        | 9.29          | 101.70   | 332.77  | 42.10        | 59.00  | 2.00  | 1.90       | 0.13          | 221.72              | 0.20                   | MILB    |
| 2016217       | 16:44 | 24.94      | 142.01      | 510.00           | 49.83        | 9.29          | 94.55    | 331.49  | 42.00        | 60.00  | 3.50  | 1.62       | 0.15          | 221.32              | 0.18                   | MILB    |
| 2016238       | 17:24 | 30.61      | 137.85      | 456.00           | 49.83        | 9.29          | 87.82    | 329.55  | 42.43        | 66.00  | 3.25  | 1.42       | 0.11          | 224.73              | 0.21                   | MILB    |
| 2017196       | 12:32 | 0.41       | 121.98      | 113.00           | 49.83        | 9.29          | 104.14   | 321.96  | 72.07        | 21.00  | 7.00  | 0.47       | 0.04          | 74.91               | 0.07                   | MILB    |
| 2018240       | 22:55 | 16.80      | 146.84      | 55.00            | 49.83        | 9.29          | 103.82   | 333.25  | 41.74        | 62.00  | 2.00  | 1.32       | 0.09          | 223.75              | 0.26                   | MILB    |
| 2015135       | 20:46 | -2.54      | 102.22      | 151.00           | 49.69        | 11.22         | 92.57    | 319.46  | 90.88        | 83.00  | 5.25  | 1.50       | 0.29          | 96.63               | 0.46                   | GRA1    |
| 2015161       | 14:12 | -22.40     | -68.43      | 124.00           | 49.69        | 11.22         | 100.38   | 40.50   | 247.75       | 88.00  | 5.25  | 1.17       | 0.18          | 248.98              | 0.29                   | GRA1    |
| 2015262       | 05:26 | -29.64     | -72.08      | 6.00             | 49.69        | 11.22         | 107.95   | 42.69   | 245.35       | -87.00 | 11.75 | 1.25       | 0.29          | 64.15               | 2.36                   | GRA1    |
| 2016201       | 05:38 | -30.25     | -71.97      | 8.00             | 49.69        | 11.22         | 108.33   | 42.79   | 244.84       | -32.00 | 7.25  | 1.75       | 0.42          | 74.49               | 1.78                   | GRA1    |
| 2016207       | 17:46 | -26.11     | -70.51      | 72.00            | 49.69        | 11.22         | 104.41   | 41.57   | 246.73       | 75.00  | 4.50  | 2.00       | 0.40          | 242.12              | 0.29                   | GRA1    |
| 2016211       | 21:38 | 18.54      | 145.51      | 196.00           | 49.69        | 11.22         | 100.95   | 331.74  | 43.77        | -64.00 | 11.75 | 0.95       | 0.22          | 50.88               | 0.66                   | GRA1    |
| 2016217       | 14:35 | -22.33     | -66.01      | 270.00           | 49.69        | 11.22         | 98.88    | 39.87   | 246.06       | 79.00  | 27.75 | 1.82       | 0.75          | 243.00              | 1.88                   | GRA1    |
| 2017052       | 14:29 | -19.28     | -63.90      | 595.00           | 49.69        | 11.22         | 95.28    | 39.07   | 246.47       | 71.00  | 2.50  | 2.45       | 0.16          | 238.26              | 0.80                   | GRA1    |
| 2017105       | 08:39 | -23.27     | -67.72      | 155.00           | 49.69        | 11.22         | 100.61   | 40.43   | 246.67       | 82.00  | 4.50  | 1.40       | 0.19          | 242.42              | 0.28                   | GRA1    |
| 2017283       | 06:52 | -18.57     | -69.75      | 85.00            | 49.69        | 11.22         | 98.28    | 40.40   | 251.21       | 84.00  | 6.75  | 1.62       | 0.52          | 253.92              | 0.55                   | GRA1    |
| 2018092       | 14:00 | -20.66     | -63.01      | 559.00           | 49.69        | 11.22         | 95.82    | 38.92   | 244.95       | 78.00  | 3.75  | 1.42       | 0.24          | 245.21              | 0.37                   | GRA1    |
| 2018236       | 09:24 | -11.04     | -70.83      | 630.00           | 49.69        | 11.22         | 93.24    | 40.11   | 256.87       | -89.00 | 5.75  | 1.38       | 0.35          | 78.80               | 0.57                   | GRA1    |
| 2015161       | 14:12 | -22.40     | -68.43      | 124.00           | 49.66        | 11.36         | 100.45   | 40.57   | 247.84       | 83.00  | 6.25  | 2.17       | 0.41          | 246.44              | 1.19                   | GRA2    |
| 2015271       | 15:48 | -23.80     | -66.61      | 219.00           | 49.66        | 11.36         | 100.42   | 40.26   | 245.63       | 80.00  | 24.50 | 1.07       | 0.64          | 245.68              | 0.40                   | GRA2    |
| 2016207       | 17:46 | -26.11     | -70.51      | 72.00            | 49.66        | 11.36         | 104.48   | 41.64   | 246.82       | 83.00  | 15.25 | 1.50       | 0.59          | 246.18              | 0.31                   | GRA2    |
| 2016211       | 21:38 | 18.54      | 145.51      | 196.00           | 49.66        | 11.36         | 100.91   | 331.65  | 43.89        | -61.00 | 17.25 | 0.92       | 0.40          | 51.96               | 0.72                   | GRA2    |
| 2016217       | 16:44 | 24.94      | 142.01      | 510.00           | 49.66        | 11.36         | 93.76    | 330.39  | 43.65        | -77.00 | 12.25 | 0.68       | 0.11          | 50.77               | 0.36                   | GRA2    |
| 2018092       | 14:00 | -20.66     | -63.01      | 559.00           | 49.66        | 11.36         | 95.89    | 38.99   | 245.04       | 80.00  | 3.00  | 1.25       | 0.18          | 246.15              | 0.48                   | GRA2    |
| 2015161       | 14:12 | -22.40     | -68.43      | 124.00           | 49.76        | 11.32         | 100.46   | 40.46   | 247.83       | 78.00  | 1.50  | 2.42       | 0.17          | 246.84              | 0.14                   | GRA3    |
| 2016207       | 17:46 | -26.11     | -70.51      | 72.00            | 49.76        | 11.32         | 104.50   | 41.53   | 246.82       | 88.00  | 14.50 | 1.20       | 0.47          | 249.89              | 0.51                   | GRA3    |
| 2016211       | 21:38 | 18.54      | 145.51      | 196.00           | 49.76        | 11.32         | 100.85   | 331.74  | 43.84        | -58.00 | 22.25 | 1.05       | 0.54          | 53.00               | 1.06                   | GRA3    |
| 2017052       | 14:29 | -19.28     | -63.90      | 595.00           | 49.76        | 11.32         | 95.37    | 39.03   | 246.54       | 75.00  | 20.50 | 1.57       | 0.50          | 243.84              | 0.98                   | GRA3    |
| 2017196       | 12:32 | 0.41       | 121.98      | 113.00           | 49.76        | 11.32         | 102.91   | 321.50  | 73.72        | 82.00  | 26.50 | 0.92       | 0.98          | 251.89              | 0.78                   | GRA3    |
| 2017243       | 17:26 | -1.16      | 99.69       | 43.00            | 49.76        | 11.32         | 89.82    | 319.59  | 91.99        | 85.00  | 3.50  | 1.90       | 0.49          | 91.82               | 0.27                   | GRA3    |
| 2017283       | 06:52 | -18.57     | -69.75      | 85.00            | 49.76        | 11.32         | 98.36    | 40.35   | 251.29       | 79.00  | 1.50  | 2.70       | 0.28          | 249.90              | 0.36                   | GRA3    |
| 2018021       | 01:26 | -18.88     | -69.44      | 116.00           | 49.76        | 11.32         | 98.41    | 40.32   | 250.86       | -78.00 | 19.00 | 1.57       | 0.64          | 75.23               | 2.67                   | GRA3    |
| 2018092       | 14:00 | -20.66     | -63.01      | 559.00           | 49.76        | 11.32         | 95.91    | 38.88   | 245.02       | 82.00  | 3.75  | 1.35       | 0.16          | 244.95              | 0.37                   | GRA3    |
| 2018236       | 09:24 | -11.04     | -70.83      | 630.00           | 49.76        | 11.32         | 93.32    | 40.05   | 256.95       | -60.00 | 20.75 | 0.75       | 0.34          | 82.17               | 0.69                   | GRA3    |
| 2015135       | 20:46 | -2.54      | 102.22      | 151.00           | 49.57        | 11.44         | 92.43    | 319.34  | 91.05        | 81.00  | 2.00  | 1.70       | 0.19          | 91.38               | 0.25                   | GRA4    |
| 2015271       | 15:48 | -23.80     | -66.61      | 219.00           | 49.57        | 11.44         | 100.43   | 40.37   | 245.66       | 81.00  | 5.25  | 1.88       | 0.37          | 247.77              | 1.77                   | GRA4    |
| 2016207       | 17:46 | -26.11     | -70.51      | 72.00            | 49.57        | 11.44         | 104.49   | 41.75   | 246.85       | 82.00  | 5.00  | 1.32       | 0.31          | 249.80              | 0.33                   | GRA4    |
| 2016211       | 21:38 | 18.54      | 145.51      | 196.00           | 49.57        | 11.44         | 100.94   | 331.55  | 43.97        | -66.00 | 10.50 | 0.88       | 0.20          | 49.37               | 0.46                   | GRA4    |
| 2016217       | 16:44 | 24.94      | 142.01      | 510.00           | 49.57        | 11.44         | 93.79    | 330.29  | 43.71        | -71.00 | 9.50  | 0.85       | 0.13          | 50.51               | 0.42                   | GRA4    |
| 2016293       | 00:46 | -4.86      | 108.16      | 614.00           | 49.57        | 11.44         | 98.04    | 319.23  | 88.05        | 82.00  | 5.25  | 2.17       | 0.59          | 91.88               | 0.82                   | GRA4    |
| 2017105       | 08:39 | -23.27     | -67.72      | 155.00           | 49.57        | 11.44         | 100.69   | 40.60   | 246.80       | -23.00 | 5.00  | 2.65       | 0.54          | 80.11               | 1.08                   | GRA4    |

| DATE (YYYYJJ) | TIME  | Event Lat. | Event Long. | Event depth (km) | Station Lat. | Station Long. | Distance | Azimuth | Back Azimuth | Phi    | dPhi  | Delay Time | d(Delay Time) | Source Polarization | d(Source Polarization) | Station |
|---------------|-------|------------|-------------|------------------|--------------|---------------|----------|---------|--------------|--------|-------|------------|---------------|---------------------|------------------------|---------|
| 2017283       | 06:52 | -18.57     | -69.75      | 85.00            | 49.57        | 11.44         | 98.37    | 40.57   | 251.35       | 80.00  | 1.75  | 2.20       | 0.22          | 252.39              | 0.41                   | GRA4    |
| 2018021       | 01:26 | -18.88     | -69.44      | 116.00           | 49.57        | 11.44         | 98.42    | 40.53   | 250.92       | 80.00  | 5.00  | 2.17       | 0.53          | 249.39              | 0.48                   | GRA4    |
| 2018092       | 14:00 | -20.66     | -63.01      | 559.00           | 49.57        | 11.44         | 95.90    | 39.09   | 245.09       | 79.00  | 8.50  | 1.45       | 0.41          | 244.02              | 0.71                   | GRA4    |
| 2018240       | 22:55 | 16.80      | 146.84      | 55.00            | 49.57        | 11.44         | 103.07   | 332.01  | 43.66        | -65.00 | 12.75 | 0.85       | 0.20          | 53.59               | 2.24                   | GRA4    |
| 2016106       | 14:31 | 13.40      | -92.37      | 22.00            | 48.93        | 14.99         | 91.05    | 39.01   | 291.73       | 30.00  | 20.75 | 1.05       | 0.49          | 111.50              | 0.24                   | A015A   |
| 2016113       | 03:23 | -0.29      | -80.50      | 10.00            | 48.93        | 14.99         | 93.84    | 41.14   | 273.95       | -60.00 | 22.75 | 0.55       | 0.98          | 94.99               | 1.53                   | A015A   |
| 2016139       | 08:17 | 0.43       | -79.79      | 16.00            | 48.93        | 14.99         | 92.83    | 41.14   | 273.88       | -87.00 | 25.75 | 3.65       | 0.99          | 279.52              | 0.76                   | A015A   |
| 2016207       | 17:46 | -26.11     | -70.51      | 72.00            | 48.93        | 14.99         | 106.41   | 43.26   | 249.14       | 85.00  | 18.00 | 1.17       | 0.50          | 246.40              | 1.83                   | A015A   |
| 2016211       | 21:38 | 18.54      | 145.51      | 196.00           | 48.93        | 14.99         | 99.72    | 329.43  | 47.03        | 78.00  | 7.50  | 0.90       | 0.11          | 227.70              | 0.23                   | A015A   |
| 2016217       | 16:44 | 24.94      | 142.01      | 510.00           | 48.93        | 14.99         | 92.59    | 328.19  | 46.52        | 83.00  | 5.50  | 1.00       | 0.06          | 225.30              | 0.12                   | A015A   |
| 2017049       | 12:30 | -23.86     | -66.66      | 222.00           | 48.93        | 14.99         | 102.40   | 41.92   | 248.04       | -81.00 | 18.75 | 1.35       | 0.57          | 67.72               | 4.65                   | A015A   |
| 2017196       | 12:32 | 0.41       | 121.98      | 113.00           | 48.93        | 14.99         | 100.80   | 320.06  | 76.80        | 84.00  | 13.75 | 1.90       | 0.97          | 257.63              | 0.41                   | A015A   |
| 2017279       | 08:19 | 37.50      | 144.02      | 9.00             | 48.93        | 14.99         | 82.79    | 328.91  | 38.52        | -87.00 | 23.50 | 2.10       | 0.79          | 280.06              | 0.25                   | A015A   |
| 2017283       | 06:52 | -18.57     | -69.75      | 85.00            | 48.93        | 14.99         | 100.41   | 41.89   | 253.82       | -88.00 | 23.00 | 0.90       | 0.96          | 77.86               | 0.30                   | A015A   |
| 2018092       | 14:00 | -20.66     | -63.01      | 559.00           | 48.93        | 14.99         | 97.78    | 40.62   | 247.60       | -87.00 | 16.25 | 0.90       | 0.30          | 65.78               | 1.04                   | A015A   |
| 2016211       | 21:38 | 18.54      | 145.51      | 196.00           | 48.12        | 13.31         | 101.09   | 329.62  | 45.74        | 83.00  | 14.50 | 1.32       | 0.25          | 212.30              | 1.33                   | A032A   |
| 2016217       | 16:44 | 24.94      | 142.01      | 510.00           | 48.12        | 13.31         | 93.96    | 328.39  | 45.25        | 88.00  | 5.25  | 1.75       | 0.09          | 215.50              | 1.19                   | A032A   |
| 2016238       | 17:24 | 30.61      | 137.85      | 456.00           | 48.12        | 13.31         | 87.22    | 326.46  | 45.31        | 87.00  | 4.75  | 1.15       | 0.05          | 218.38              | 0.70                   | A032A   |
| 2017283       | 06:52 | -18.57     | -69.75      | 85.00            | 48.12        | 13.31         | 99.10    | 42.34   | 252.48       | 86.00  | 15.25 | 1.02       | 0.37          | 243.62              | 1.52                   | A032A   |
| 2015271       | 15:48 | -23.80     | -66.61      | 219.00           | 47.48        | 13.13         | 100.61   | 42.77   | 246.49       | -49.00 | 25.25 | 0.52       | 0.98          | 63.84               | 1.35                   | A033A   |
| 2015351       | 20:09 | 15.80      | -93.63      | 85.00            | 47.48        | 13.13         | 89.39    | 40.51   | 292.80       | 29.00  | 14.75 | 0.82       | 0.32          | 99.81               | 0.19                   | A033A   |
| 2016153       | 23:16 | -2.10      | 100.67      | 50.00            | 47.48        | 13.13         | 89.87    | 317.34  | 93.22        | 78.00  | 17.25 | 1.27       | 0.51          | 90.63               | 1.61                   | A033A   |
| 2016159       | 11:11 | 18.36      | -105.17     | 10.00            | 47.48        | 13.13         | 94.32    | 36.80   | 303.00       | 83.00  | 14.75 | 0.68       | 0.16          | 126.81              | 0.18                   | A033A   |
| 2016159       | 19:35 | 1.28       | 126.37      | 31.00            | 47.48        | 13.13         | 104.56   | 319.91  | 71.64        | -62.00 | 27.00 | 0.47       | 0.97          | 73.60               | 1.18                   | A033A   |
| 2016193       | 02:31 | 0.58       | -79.64      | 21.00            | 47.48        | 13.13         | 91.45    | 42.67   | 272.42       | -20.00 | 24.50 | 0.95       | 0.96          | 80.65               | 0.42                   | A033A   |
| 2016207       | 17:46 | -26.11     | -70.51      | 72.00            | 47.48        | 13.13         | 104.72   | 44.19   | 247.50       | -31.00 | 21.50 | 0.88       | 0.52          | 65.50               | 0.24                   | A033A   |
| 2016211       | 21:38 | 18.54      | 145.51      | 196.00           | 47.48        | 13.13         | 101.63   | 329.23  | 45.68        | -86.00 | 4.00  | 1.57       | 0.09          | 42.73               | 0.68                   | A033A   |
| 2016217       | 16:43 | 24.94      | 142.01      | 510.00           | 47.48        | 13.13         | 94.50    | 328.02  | 45.14        | -84.00 | 7.25  | 1.52       | 0.13          | 41.40               | 0.43                   | A033A   |
| 2016238       | 17:24 | 30.61      | 137.85      | 456.00           | 47.48        | 13.13         | 87.76    | 326.09  | 45.17        | 89.00  | 8.75  | 1.52       | 0.12          | 220.26              | 1.01                   | A033A   |
| 2016244       | 03:31 | -3.68      | 152.79      | 476.00           | 47.48        | 13.13         | 124.25   | 327.91  | 51.40        | 49.00  | 25.25 | 1.38       | 0.67          | 215.95              | 0.83                   | A033A   |
| 2016283       | 15:06 | 1.77       | 127.45      | 128.00           | 47.48        | 13.13         | 104.88   | 320.24  | 70.46        | -51.00 | 26.00 | 0.45       | 0.99          | 63.06               | 2.34                   | A033A   |
| 2016329       | 19:03 | 11.91      | -88.90      | 10.00            | 47.48        | 13.13         | 89.29    | 41.57   | 286.80       | 14.00  | 3.50  | 1.10       | 0.32          | 96.02               | 0.08                   | A033A   |
| 2017049       | 12:30 | -23.86     | -66.66      | 222.00           | 47.48        | 13.13         | 100.69   | 42.79   | 246.48       | 76.00  | 22.25 | 0.82       | 0.56          | 244.47              | 0.34                   | A033A   |
| 2017140       | 01:26 | 9.38       | 123.95      | 533.00           | 47.48        | 13.13         | 96.83    | 320.32  | 68.27        | -62.00 | 20.25 | 0.55       | 0.19          | 73.36               | 2.15                   | A033A   |
| 2017173       | 12:51 | 13.72      | -90.97      | 38.00            | 47.48        | 13.13         | 89.28    | 41.14   | 289.50       | 69.00  | 19.50 | 0.52       | 0.29          | 98.50               | 0.40                   | A033A   |
| 2015315       | 02:14 | -29.51     | -72.01      | 12.00            | 46.91        | 13.08         | 107.79   | 45.84   | 245.80       | 83.00  | 22.25 | 1.80       | 0.87          | 247.61              | 1.94                   | A034A   |
| 2015351       | 20:09 | 15.80      | -93.63      | 85.00            | 46.91        | 13.08         | 89.59    | 41.05   | 292.77       | -86.00 | 6.50  | 2.08       | 0.24          | 302.25              | 0.95                   | A034A   |
| 2016106       | 14:31 | 13.40      | -92.37      | 22.00            | 46.91        | 13.08         | 90.58    | 41.37   | 290.28       | -89.00 | 3.75  | 2.10       | 0.09          | 302.15              | 0.73                   | A034A   |
| 2016207       | 17:46 | -26.11     | -70.51      | 72.00            | 46.91        | 13.08         | 104.47   | 44.72   | 247.33       | 88.00  | 23.75 | 0.97       | 0.56          | 244.75              | 2.79                   | A034A   |
| 2016329       | 19:03 | 11.91      | -88.90      | 10.00            | 46.91        | 13.08         | 89.43    | 42.12   | 286.77       | 89.00  | 4.50  | 1.97       | 0.19          | 113.88              | 0.68                   | A034A   |
| 2017266       | 10:58 | 15.49      | -94.43      | 53.00            | 46.91        | 13.08         | 90.32    | 40.83   | 293.15       | -87.00 | 5.50  | 2.38       | 0.24          | 298.23              | 2.00                   | A034A   |
| 2015330       | 06:05 | -9.18      | -71.26      | 602.00           | 47.20        | 12.72         | 92.60    | 42.76   | 259.40       | 55.00  | 9.75  | 1.55       | 0.44          | 67.40               | 0.61                   | A035A   |
| 2016129       | 07:54 | 16.41      | -97.84      | 22.00            | 47.20        | 12.72         | 91.40    | 39.69   | 295.99       | 41.00  | 9.25  | 0.75       | 0.16          | 107.60              | 0.41                   | A035A   |
| 2016159       | 11:11 | 18.36      | -105.17     | 10.00            | 47.20        | 12.72         | 94.24    | 37.18   | 302.68       | 73.00  | 14.00 | 1.00       | 0.15          | 114.80              | 0.36                   | A035A   |
| 2016207       | 17:46 | -26.11     | -70.51      | 72.00            | 47.20        | 12.72         | 104.35   | 44.35   | 247.16       | 77.00  | 23.25 | 0.42       | 0.98          | 242.02              | 0.33                   | A035A   |
| 2016211       | 21:38 | 18.54      | 145.51      | 196.00           | 47.20        | 12.72         | 102.02   | 329.22  | 45.39        | 83.00  | 9.25  | 1.62       | 0.21          | 225.30              | 0.94                   | A035A   |
| 2016217       | 16:44 | 24.94      | 142.01      | 510.00           | 47.20        | 12.72         | 94.89    | 328.01  | 44.85        | 83.00  | 3.50  | 1.88       | 0.06          | 221.47              | 0.22                   | A035A   |

| DATE (YYYYJJ) | TIME  | Event Lat. | Event Long. | Event depth (km) | Station Lat. | Station Long. | Distance | Azimuth | Back Azimuth | Phi    | dPhi  | Delay Time | d(Delay Time) | Source Polarization | d(Source Polarization) | Station |
|---------------|-------|------------|-------------|------------------|--------------|---------------|----------|---------|--------------|--------|-------|------------|---------------|---------------------|------------------------|---------|
| 2016238       | 17:24 | 30.61      | 137.85      | 456.00           | 47.20        | 12.72         | 88.15    | 326.08  | 44.87        | 73.00  | 11.00 | 1.90       | 0.11          | 210.24              | 0.93                   | A035A   |
| 2016254       | 10:27 | -5.57      | -76.95      | 121.00           | 47.20        | 12.72         | 93.82    | 43.11   | 265.98       | 66.00  | 6.25  | 0.97       | 0.12          | 89.59               | 0.49                   | A035A   |
| 2016293       | 00:46 | -4.86      | 108.16      | 614.00           | 47.20        | 12.72         | 97.24    | 316.82  | 89.32        | 84.00  | 23.75 | 1.23       | 0.72          | 98.75               | 1.58                   | A035A   |
| 2016329       | 19:03 | 11.91      | -88.90      | 10.00            | 47.20        | 12.72         | 89.11    | 41.92   | 286.50       | 73.00  | 20.50 | 0.88       | 0.47          | 97.22               | 0.45                   | A035A   |
| 2017108       | 18:09 | -2.71      | -75.30      | 14.00            | 47.20        | 12.72         | 90.62    | 42.97   | 266.72       | 3.00   | 10.50 | 1.05       | 0.32          | 75.69               | 0.82                   | A035A   |
| 2017181       | 22:49 | -0.28      | -80.49      | 13.00            | 47.20        | 12.72         | 92.39    | 42.96   | 272.16       | 76.00  | 1.75  | 1.97       | 0.19          | 87.74               | 0.24                   | A035A   |
| 2017266       | 10:58 | 15.49      | -94.43      | 53.00            | 47.20        | 12.72         | 89.99    | 40.66   | 292.89       | 22.00  | 23.75 | 1.15       | 0.54          | 99.54               | 0.28                   | A035A   |
| 2017266       | 13:13 | 16.63      | -95.08      | 10.00            | 47.20        | 12.72         | 89.53    | 40.49   | 294.10       | 82.00  | 10.75 | 1.12       | 0.29          | 104.22              | 0.56                   | A035A   |
| 2017337       | 11:39 | -0.47      | -80.31      | 17.00            | 47.20        | 12.72         | 92.41    | 42.97   | 271.90       | 66.00  | 7.25  | 1.52       | 0.36          | 85.90               | 1.09                   | A035A   |
| 2017349       | 17:07 | -7.49      | 108.17      | 90.00            | 47.20        | 12.72         | 99.14    | 316.56  | 91.13        | 80.00  | 11.50 | 1.12       | 0.26          | 105.56              | 2.56                   | A035A   |
| 2016139       | 08:17 | 0.43       | -79.79      | 16.00            | 47.38        | 12.31         | 91.11    | 42.79   | 271.83       | 65.00  | 10.75 | 1.45       | 0.50          | 78.11               | 0.64                   | A036A   |
| 2016139       | 17:06 | 0.49       | -79.62      | 29.00            | 47.38        | 12.31         | 90.95    | 42.79   | 271.75       | 69.00  | 22.25 | 1.05       | 0.75          | 82.41               | 0.30                   | A036A   |
| 2016153       | 23:16 | -2.10      | 100.67      | 50.00            | 47.38        | 12.31         | 90.42    | 317.21  | 92.62        | 70.00  | 23.75 | 1.12       | 0.59          | 88.49               | 0.43                   | A036A   |
| 2016159       | 19:35 | 1.28       | 126.37      | 31.00            | 47.38        | 12.31         | 105.11   | 320.00  | 71.01        | -31.00 | 25.00 | 2.05       | 0.86          | 64.87               | 0.62                   | A036A   |
| 2016193       | 02:21 | 0.59       | -79.64      | 17.00            | 47.38        | 12.31         | 90.89    | 42.79   | 271.83       | 50.00  | 4.75  | 1.07       | 0.08          | 82.51               | 0.55                   | A036A   |
| 2016217       | 16:43 | 24.94      | 142.01      | 510.00           | 47.38        | 12.31         | 94.96    | 328.34  | 44.51        | 76.00  | 4.25  | 1.75       | 0.09          | 219.17              | 0.41                   | A036A   |
| 2016283       | 15:06 | 1.77       | 127.45      | 128.00           | 47.38        | 12.31         | 105.43   | 320.34  | 69.83        | 70.00  | 3.50  | 2.27       | 0.52          | 242.93              | 0.56                   | A036A   |
| 2016329       | 19:03 | 11.91      | -88.90      | 10.00            | 47.38        | 12.31         | 88.79    | 41.82   | 286.20       | 71.00  | 13.25 | 0.82       | 0.26          | 91.12               | 0.08                   | A036A   |
| 2017108       | 18:09 | -2.71      | -75.30      | 14.00            | 47.38        | 12.31         | 90.35    | 42.77   | 266.42       | 63.00  | 21.00 | 1.30       | 0.56          | 72.78               | 0.99                   | A036A   |
| 2017196       | 12:32 | 0.41       | 121.98      | 113.00           | 47.38        | 12.31         | 102.92   | 318.96  | 75.03        | 68.00  | 2.50  | 1.92       | 0.27          | 79.12               | 0.47                   | A036A   |
| 2017243       | 17:26 | -1.16      | 99.69       | 43.00            | 47.38        | 12.31         | 89.07    | 317.24  | 92.70        | 22.00  | 22.25 | 0.62       | 0.56          | 77.88               | 1.10                   | A036A   |
| 2017262       | 18:34 | 18.55      | -98.49      | 48.00            | 47.38        | 12.31         | 89.83    | 39.44   | 297.52       | -88.00 | 25.25 | 1.40       | 0.93          | 286.47              | 0.64                   | A036A   |
| 2017266       | 10:58 | 15.49      | -94.43      | 53.00            | 47.38        | 12.31         | 89.66    | 40.60   | 292.59       | 89.00  | 2.00  | 2.12       | 0.16          | 101.09              | 0.35                   | A036A   |
| 2017349       | 17:07 | -7.49      | 108.17      | 90.00            | 47.38        | 12.31         | 99.43    | 316.74  | 90.80        | 72.00  | 9.25  | 1.25       | 0.31          | 90.41               | 1.99                   | A036A   |
| 2018092       | 14:00 | -20.66     | -63.01      | 559.00           | 47.38        | 12.31         | 95.51    | 41.34   | 245.52       | 69.00  | 22.75 | 0.68       | 0.58          | 238.96              | 0.40                   | A036A   |
| 2015330       | 06:05 | -9.18      | -71.26      | 602.00           | 47.07        | 10.26         | 90.93    | 42.55   | 257.61       | 34.00  | 26.25 | 0.82       | 0.96          | 66.38               | 1.81                   | A037A   |
| 2015351       | 20:09 | 15.80      | -93.63      | 85.00            | 47.07        | 10.26         | 87.74    | 41.61   | 290.73       | 36.00  | 12.50 | 1.02       | 0.29          | 97.73               | 0.20                   | A037A   |
| 2016106       | 14:31 | 13.40      | -92.37      | 22.00            | 47.07        | 10.26         | 88.71    | 41.85   | 288.23       | -85.00 | 29.50 | 2.25       | 0.74          | 290.17              | 1.62                   | A037A   |
| 2016153       | 23:16 | -2.10      | 100.67      | 50.00            | 47.07        | 10.26         | 91.80    | 316.85  | 91.13        | 49.00  | 2.00  | 1.25       | 0.02          | 83.89               | 0.16                   | A037A   |
| 2016193       | 02:31 | 0.58       | -79.64      | 21.00            | 47.07        | 10.26         | 89.51    | 43.12   | 270.32       | 39.00  | 16.25 | 0.50       | 0.19          | 96.36               | 0.32                   | A037A   |
| 2016236       | 20:00 | -7.21      | 122.54      | 520.00           | 47.07        | 10.26         | 110.37   | 317.57  | 78.35        | 43.00  | 8.75  | 1.10       | 0.24          | 63.24               | 1.62                   | A037A   |
| 2016293       | 00:46 | -4.86      | 108.16      | 614.00           | 47.07        | 10.26         | 98.92    | 316.74  | 87.54        | 51.00  | 5.00  | 1.40       | 0.11          | 86.40               | 0.89                   | A037A   |
| 2017165       | 07:49 | 14.91      | -92.01      | 93.00            | 47.07        | 10.26         | 87.36    | 41.96   | 288.97       | 64.00  | 14.00 | 1.60       | 0.38          | 97.74               | 1.10                   | A037A   |
| 2017196       | 12:32 | 0.41       | 121.98      | 113.00           | 47.07        | 10.26         | 104.34   | 319.04  | 73.52        | 42.00  | 2.75  | 1.25       | 0.08          | 64.37               | 0.20                   | A037A   |
| 2017243       | 17:26 | -1.16      | 99.69       | 43.00            | 47.07        | 10.26         | 90.45    | 316.88  | 91.21        | 50.00  | 14.75 | 1.32       | 0.31          | 84.24               | 0.90                   | A037A   |
| 2018084       | 20:34 | -6.63      | 129.82      | 169.00           | 47.07        | 10.26         | 114.75   | 319.10  | 72.09        | 56.00  | 10.75 | 1.55       | 0.72          | 84.76               | 1.43                   | A037A   |
| 2018092       | 14:00 | -20.66     | -63.01      | 559.00           | 47.07        | 10.26         | 94.12    | 41.02   | 244.05       | -88.00 | 25.75 | 0.60       | 0.57          | 50.16               | 1.21                   | A037A   |
| 2018181       | 04:16 | 19.02      | -105.12     | 15.00            | 47.07        | 10.26         | 92.34    | 38.18   | 301.19       | -80.00 | 3.50  | 1.88       | 0.29          | 293.25              | 0.50                   | A037A   |
| 2016139       | 08:17 | 0.43       | -79.79      | 16.00            | 47.46        | 11.92         | 90.85    | 42.71   | 271.55       | 51.00  | 18.50 | 0.52       | 0.24          | 87.61               | 0.95                   | A038A   |
| 2016148       | 04:04 | 26.99      | 130.14      | 10.00            | 47.46        | 11.92         | 87.40    | 323.24  | 51.91        | 69.00  | 21.50 | 2.12       | 0.69          | 233.22              | 2.07                   | A038A   |
| 2016149       | 10:06 | -56.24     | -26.94      | 78.00            | 47.46        | 11.92         | 108.33   | 26.64   | 201.65       | 31.00  | 4.25  | 2.33       | 0.27          | 190.03              | 0.33                   | A038A   |
| 2016153       | 23:16 | -2.10      | 100.67      | 50.00            | 47.46        | 11.92         | 90.69    | 317.28  | 92.33        | 72.00  | 8.75  | 1.20       | 0.16          | 105.33              | 1.04                   | A038A   |
| 2016364       | 22:50 | -9.03      | 118.66      | 79.00            | 47.46        | 11.92         | 107.91   | 316.93  | 83.77        | 68.00  | 8.00  | 2.05       | 0.22          | 93.84               | 1.21                   | A038A   |
| 2017052       | 14:29 | -19.28     | -63.90      | 595.00           | 47.46        | 11.92         | 94.82    | 41.31   | 246.79       | 75.00  | 3.50  | 2.05       | 0.83          | 250.24              | 0.74                   | A038A   |
| 2017132       | 11:01 | 12.92      | -90.06      | 16.00            | 47.46        | 11.92         | 88.52    | 41.60   | 287.43       | 32.00  | 18.75 | 1.80       | 0.63          | 97.30               | 1.11                   | A038A   |
| 2018231       | 04:30 | -8.34      | 116.60      | 16.00            | 47.46        | 11.92         | 106.02   | 316.93  | 84.84        | 75.00  | 20.50 | 1.15       | 0.45          | 93.87               | 1.70                   | A038A   |
| 2018236       | 09:24 | -11.04     | -70.83      | 630.00           | 47.46        | 11.92         | 93.19    | 42.39   | 257.26       | 66.00  | 1.75  | 1.27       | 0.11          | 79.10               | 0.08                   | A038A   |

| DATE (YYYYJJ) | TIME  | Event Lat. | Event Long. | Event depth (km) | Station Lat. | Station Long. | Distance | Azimuth | Back Azimuth | Phi    | dPhi  | Delay Time | d(Delay Time) | Source Polarization | d(Source Polarization) | Station |
|---------------|-------|------------|-------------|------------------|--------------|---------------|----------|---------|--------------|--------|-------|------------|---------------|---------------------|------------------------|---------|
| 2018240       | 22:55 | 16.80      | 146.84      | 55.00            | 47.46        | 11.92         | 104.35   | 330.27  | 44.43        | 81.00  | 9.75  | 1.15       | 0.19          | 233.91              | 1.44                   | A038A   |
| 2018250       | 02:32 | -2.35      | -78.90      | 93.00            | 47.46        | 11.92         | 92.27    | 42.76   | 269.02       | 76.00  | 5.75  | 1.15       | 0.30          | 89.26               | 0.10                   | A038A   |
| 2018271       | 10:22 | -0.18      | 119.84      | 10.00            | 47.46        | 11.92         | 102.19   | 318.66  | 76.76        | 53.00  | 14.25 | 1.17       | 0.28          | 80.97               | 0.58                   | A038A   |
| 2015259       | 08:00 | 1.88       | 126.43      | 41.00            | 45.37        | 8.83          | 107.65   | 319.03  | 68.36        | 36.00  | 12.25 | 0.85       | 0.10          | 78.35               | 0.97                   | A286A   |
| 2016159       | 19:35 | 1.28       | 126.37      | 31.00            | 45.37        | 8.83          | 108.06   | 318.89  | 68.82        | 7.00   | 7.50  | 0.77       | 0.11          | 69.06               | 0.53                   | A286A   |
| 2015328       | 23:05 | -10.54     | -70.94      | 606.00           | 45.14        | 9.38          | 90.65    | 44.25   | 255.79       | -28.00 | 3.50  | 2.52       | 0.17          | 78.35               | 1.51                   | A284A   |
| 2016234       | 04:05 | -55.31     | -31.75      | 12.00            | 45.14        | 9.38          | 105.95   | 28.96   | 203.03       | 33.00  | 2.50  | 1.92       | 0.22          | 203.75              | 0.26                   | A284A   |
| 2017196       | 12:32 | 0.41       | 121.98      | 113.00           | 45.14        | 9.38          | 105.48   | 317.31  | 73.33        | 43.00  | 7.75  | 0.92       | 0.17          | 65.94               | 0.50                   | A284A   |
| 2018240       | 22:55 | 16.80      | 146.84      | 55.00            | 45.14        | 9.38          | 107.25   | 329.93  | 42.70        | 37.00  | 23.00 | 0.90       | 0.39          | 212.66              | 0.07                   | A284A   |
| 2016111       | 08:53 | 0.64       | -80.21      | 14.00            | 45.31        | 10.66         | 90.17    | 44.87   | 271.07       | -79.00 | 9.25  | 1.60       | 0.45          | 85.95               | 1.46                   | A313A   |
| 2016113       | 03:23 | -0.29      | -80.50      | 10.00            | 45.31        | 10.66         | 91.02    | 44.88   | 270.62       | -87.00 | 2.00  | 3.27       | 0.11          | 77.27               | 0.27                   | A313A   |
| 2016153       | 23:16 | -2.10      | 100.67      | 50.00            | 45.31        | 10.66         | 91.48    | 315.10  | 91.47        | 41.00  | 21.25 | 1.00       | 0.33          | 106.10              | 0.77                   | A313A   |
| 2016159       | 11:11 | 18.36      | -105.17     | 10.00            | 45.31        | 10.66         | 94.02    | 39.54   | 301.03       | -56.00 | 3.25  | 3.38       | 0.34          | 110.65              | 0.78                   | A313A   |
| 2016207       | 17:46 | -26.11     | -70.51      | 72.00            | 45.31        | 10.66         | 102.29   | 45.53   | 245.41       | 87.00  | 18.75 | 1.23       | 0.43          | 250.75              | 0.78                   | A313A   |
| 2016211       | 21:38 | 18.54      | 145.51      | 196.00           | 45.31        | 10.66         | 104.37   | 328.91  | 43.98        | 61.00  | 2.50  | 1.23       | 0.28          | 235.35              | 0.28                   | A313A   |
| 2016329       | 19:03 | 11.91      | -88.90      | 10.00            | 45.31        | 10.66         | 88.25    | 44.12   | 285.07       | -56.00 | 22.75 | 0.85       | 0.53          | 112.50              | 0.48                   | A313A   |
| 2017010       | 06:33 | 4.48       | 122.62      | 627.00           | 45.31        | 10.66         | 102.01   | 318.00  | 70.97        | 51.00  | 21.50 | 0.52       | 0.38          | 83.06               | 0.69                   | A313A   |
| 2017243       | 17:26 | -1.16      | 99.69       | 43.00            | 45.31        | 10.66         | 90.13    | 315.13  | 91.50        | 49.00  | 12.50 | 0.90       | 0.16          | 104.73              | 0.59                   | A313A   |
| 2018250       | 02:32 | -2.35      | -78.90      | 93.00            | 45.31        | 10.66         | 91.35    | 44.89   | 268.04       | -74.00 | 16.25 | 1.32       | 0.37          | 84.74               | 0.74                   | A313A   |
| 2016153       | 23:16 | -2.10      | 100.67      | 50.00            | 45.11        | 10.48         | 91.61    | 314.89  | 91.34        | 72.00  | 10.75 | 1.55       | 0.57          | 82.90               | 0.20                   | A312A   |
| 2017196       | 12:32 | 0.41       | 121.98      | 113.00           | 45.11        | 10.48         | 104.74   | 317.05  | 74.17        | 13.00  | 37.25 | 0.92       | 0.45          | 69.92               | 1.64                   | A312A   |
| 2016111       | 08:53 | 0.64       | -80.21      | 14.00            | 45.63        | 11.97         | 91.08    | 44.53   | 272.00       | 66.00  | 13.50 | 1.62       | 0.49          | 88.72               | 2.34                   | A302A   |
| 2016157       | 16:45 | -4.59      | 125.63      | 429.00           | 45.63        | 11.97         | 109.71   | 316.95  | 75.91        | 56.00  | 30.25 | 2.40       | 0.89          | 70.39               | 2.81                   | A302A   |
| 2016159       | 19:35 | 1.28       | 126.37      | 31.00            | 45.63        | 11.97         | 105.90   | 318.36  | 71.21        | 36.00  | 4.25  | 1.30       | 0.13          | 61.11               | 1.23                   | A302A   |
| 2016207       | 17:46 | -26.11     | -70.51      | 72.00            | 45.63        | 11.97         | 103.26   | 45.62   | 246.32       | 55.00  | 6.00  | 2.45       | 0.52          | 68.29               | 1.05                   | A302A   |
| 2016211       | 21:38 | 18.54      | 145.51      | 196.00           | 45.63        | 11.97         | 103.49   | 328.46  | 45.01        | 48.00  | 2.25  | 1.57       | 0.16          | 213.63              | 0.16                   | A302A   |
| 2016217       | 14:35 | -22.33     | -66.01      | 270.00           | 45.63        | 11.97         | 97.69    | 43.83   | 246.04       | 57.00  | 26.00 | 2.58       | 0.74          | 70.71               | 1.59                   | A302A   |
| 2016217       | 16:44 | 24.94      | 142.01      | 510.00           | 45.63        | 11.97         | 96.37    | 327.28  | 44.38        | 53.00  | 5.50  | 1.57       | 0.19          | 211.95              | 0.43                   | A302A   |
| 2016236       | 20:00 | -7.21      | 122.54      | 520.00           | 45.63        | 11.97         | 109.48   | 315.83  | 80.17        | 18.00  | 6.25  | 1.30       | 0.09          | 64.92               | 1.80                   | A302A   |
| 2016293       | 00:46 | -4.86      | 108.16      | 614.00           | 45.63        | 11.97         | 97.78    | 315.25  | 88.99        | 30.00  | 19.00 | 1.15       | 0.43          | 77.02               | 1.96                   | A302A   |
| 2017049       | 12:30 | -23.86     | -66.66      | 222.00           | 45.63        | 11.97         | 99.21    | 44.17   | 245.41       | 39.00  | 5.25  | 1.48       | 0.34          | 51.50               | 0.75                   | A302A   |
| 2017052       | 14:29 | -19.28     | -63.90      | 595.00           | 45.63        | 11.97         | 94.13    | 43.02   | 246.70       | 56.00  | 5.75  | 2.95       | 0.42          | 72.55               | 1.88                   | A302A   |
| 2017187       | 08:23 | 11.13      | 124.63      | 9.00             | 45.63        | 11.97         | 97.39    | 319.24  | 65.96        | 49.00  | 7.25  | 2.15       | 0.46          | 65.27               | 0.35                   | A302A   |
| 2018125       | 06:39 | 14.57      | 123.92      | 18.00            | 45.63        | 11.97         | 94.35    | 319.26  | 64.25        | 54.00  | 15.50 | 1.23       | 0.92          | 63.44               | 0.37                   | A302A   |
| 2018181       | 04:16 | 19.02      | -105.12     | 15.00            | 45.63        | 11.97         | 94.10    | 38.77   | 302.39       | 45.00  | 5.00  | 1.30       | 0.34          | 124.61              | 0.36                   | A302A   |
| 2018209       | 23:07 | -8.24      | 116.51      | 14.00            | 45.63        | 11.97         | 106.01   | 315.04  | 85.40        | 47.00  | 10.25 | 0.97       | 0.12          | 87.03               | 0.32                   | A302A   |
| 2018217       | 12:06 | -8.26      | 116.44      | 34.00            | 45.63        | 11.97         | 105.97   | 315.03  | 85.46        | 46.00  | 16.75 | 1.10       | 0.27          | 90.76               | 1.80                   | A302A   |
| 2018221       | 05:45 | -8.31      | 116.23      | 15.00            | 45.63        | 11.97         | 105.86   | 315.01  | 85.65        | 49.00  | 7.25  | 1.17       | 0.09          | 95.50               | 0.85                   | A302A   |
| 2018229       | 15:55 | -7.37      | 119.80      | 529.00           | 45.63        | 11.97         | 107.69   | 315.48  | 82.34        | 27.00  | 17.00 | 1.23       | 0.27          | 76.41               | 1.54                   | A302A   |
| 2018236       | 09:24 | -11.04     | -70.83      | 630.00           | 45.63        | 11.97         | 92.82    | 44.18   | 257.21       | -9.00  | 3.75  | 1.17       | 0.21          | 66.81               | 0.39                   | A302A   |
| 2018240       | 22:55 | 16.80      | 146.84      | 55.00            | 45.63        | 11.97         | 105.63   | 328.91  | 44.82        | 64.00  | 1.75  | 1.55       | 0.10          | 230.65              | 0.21                   | A302A   |
| 2018271       | 10:22 | -0.18      | 119.84      | 10.00            | 45.63        | 11.97         | 102.56   | 316.83  | 77.19        | 24.00  | 12.00 | 1.02       | 0.16          | 80.24               | 0.37                   | A302A   |
| 2017010       | 06:33 | 4.48       | 122.62      | 627.00           | 45.62        | 12.62         | 100.60   | 317.86  | 72.39        | 60.00  | 25.00 | 2.02       | 0.64          | 69.06               | 1.39                   | A301A   |
| 2017105       | 08:39 | -23.27     | -67.72      | 155.00           | 45.62        | 12.62         | 99.88    | 44.61   | 246.96       | 58.00  | 6.00  | 3.67       | 0.44          | 67.96               | 0.82                   | A301A   |
| 2017196       | 12:32 | 0.41       | 121.98      | 113.00           | 45.62        | 12.62         | 103.15   | 317.16  | 75.66        | 51.00  | 12.50 | 1.57       | 0.39          | 74.92               | 1.18                   | A301A   |
| 2017283       | 06:52 | -18.57     | -69.75      | 85.00            | 45.62        | 12.62         | 97.88    | 44.61   | 251.65       | -3.00  | 17.50 | 0.65       | 0.27          | 56.78               | 1.36                   | A301A   |
| 2018209       | 23:07 | -8.24      | 116.51      | 14.00            | 45.62        | 12.62         | 105.56   | 314.99  | 85.87        | 26.00  | 18.75 | 1.07       | 0.34          | 71.83               | 2.70                   | A301A   |



| DATE (YYYYJJ) | TIME  | Event Lat. | Event Long. | Event depth (km) | Station Lat. | Station Long. | Distance | Azimuth | Back Azimuth | Phi    | dPhi  | Delay Time | d(Delay Time) | Source Polarization | d(Source Polarization) | Station |
|---------------|-------|------------|-------------|------------------|--------------|---------------|----------|---------|--------------|--------|-------|------------|---------------|---------------------|------------------------|---------|
| 2018250       | 02:32 | -2.35      | -78.90      | 93.00            | 45.62        | 12.62         | 92.73    | 44.62   | 269.44       | 22.00  | 16.25 | 0.68       | 0.17          | 73.63               | 0.47                   | A301A   |
| 2018251       | 07:36 | 7.24       | 126.48      | 10.00            | 45.62        | 12.62         | 101.10   | 319.15  | 67.61        | 34.00  | 8.50  | 1.05       | 0.16          | 62.57               | 0.44                   | A301A   |
| 2016106       | 14:31 | 13.40      | -92.37      | 22.00            | 45.34        | 12.32         | 90.62    | 43.02   | 289.72       | 40.00  | 22.25 | 0.57       | 0.39          | 114.34              | 0.49                   | A303A   |
| 2016153       | 23:16 | -2.10      | 100.67      | 50.00            | 45.34        | 12.32         | 90.32    | 315.17  | 92.64        | 59.00  | 8.25  | 1.17       | 0.16          | 88.59               | 0.63                   | A303A   |
| 2018181       | 04:16 | 19.02      | -105.12     | 15.00            | 45.34        | 12.32         | 94.46    | 38.89   | 302.63       | -69.00 | 23.00 | 0.62       | 0.35          | 307.26              | 0.39                   | A303A   |
| 2018250       | 02:32 | -2.35      | -78.90      | 93.00            | 45.34        | 12.32         | 92.51    | 44.89   | 269.22       | 6.00   | 18.00 | 1.10       | 0.46          | 82.29               | 0.46                   | A303A   |
| 2016153       | 23:16 | -2.10      | 100.67      | 50.00            | 45.25        | 7.61          | 93.64    | 315.03  | 89.31        | 35.00  | 10.25 | 1.65       | 0.14          | 83.92               | 0.54                   | A282A   |
| 2016159       | 11:11 | 18.36      | -105.17     | 10.00            | 45.25        | 7.61          | 92.19    | 40.67   | 298.81       | 17.00  | 10.00 | 1.23       | 0.43          | 123.78              | 1.00                   | A282A   |
| 2016217       | 16:44 | 24.94      | 142.01      | 510.00           | 45.25        | 7.61          | 98.73    | 329.30  | 41.02        | 49.00  | 17.50 | 1.38       | 0.41          | 215.81              | 0.49                   | A282A   |
| 2018250       | 02:32 | -2.35      | -78.90      | 93.00            | 45.25        | 7.61          | 89.19    | 44.84   | 265.88       | 75.00  | 9.25  | 1.17       | 0.26          | 94.12               | 0.77                   | A282A   |
| 2016062       | 13:09 | -4.95      | 94.33       | 24.00            | 45.23        | 8.32          | 90.67    | 315.17  | 96.29        | 21.00  | 15.00 | 1.80       | 0.51          | 89.58               | 2.24                   | A283A   |
| 2015351       | 20:09 | 15.80      | -93.63      | 85.00            | 45.82        | 13.13         | 90.04    | 42.04   | 292.81       | 56.00  | 18.25 | 0.72       | 0.26          | 104.15              | 0.85                   | A300A   |
| 2016153       | 23:16 | -2.10      | 100.67      | 50.00            | 45.82        | 13.13         | 89.77    | 315.68  | 93.22        | 17.00  | 24.75 | 1.12       | 0.62          | 89.77               | 0.57                   | A300A   |
| 2016159       | 11:11 | 18.36      | -105.17     | 10.00            | 45.82        | 13.13         | 95.22    | 38.19   | 302.89       | 42.00  | 21.75 | 0.92       | 0.46          | 109.87              | 1.08                   | A300A   |
| 2016159       | 19:35 | 1.28       | 126.37      | 31.00            | 45.82        | 13.13         | 105.07   | 318.28  | 72.05        | 44.00  | 4.75  | 0.77       | 0.06          | 73.99               | 1.03                   | A300A   |
| 2016211       | 21:38 | 18.54      | 145.51      | 196.00           | 45.82        | 13.13         | 102.79   | 328.01  | 45.94        | 72.00  | 2.50  | 1.07       | 0.04          | 219.99              | 0.23                   | A300A   |
| 2016217       | 16:44 | 24.94      | 142.01      | 510.00           | 45.82        | 13.13         | 95.67    | 326.83  | 45.25        | 73.00  | 3.50  | 1.05       | 0.02          | 211.97              | 0.25                   | A300A   |
| 2016238       | 17:24 | 30.61      | 137.85      | 456.00           | 45.82        | 13.13         | 88.93    | 324.91  | 45.13        | 72.00  | 3.25  | 1.32       | 0.04          | 212.36              | 0.37                   | A300A   |
| 2016244       | 03:31 | -3.68      | 152.79      | 476.00           | 45.82        | 13.13         | 125.28   | 326.32  | 52.31        | 68.00  | 21.25 | 0.70       | 0.29          | 232.07              | 1.25                   | A300A   |
| 2016267       | 00:34 | 34.46      | 141.64      | 10.00            | 45.82        | 13.13         | 87.55    | 326.79  | 40.33        | 86.00  | 14.50 | 1.38       | 0.29          | 213.45              | 2.01                   | A300A   |
| 2016283       | 15:06 | 1.77       | 127.45      | 128.00           | 45.82        | 13.13         | 105.42   | 318.62  | 70.88        | 26.00  | 18.50 | 0.70       | 0.24          | 57.86               | 2.65                   | A300A   |
| 2016293       | 00:46 | -4.86      | 108.16      | 614.00           | 45.82        | 13.13         | 96.97    | 315.43  | 89.79        | 25.00  | 6.75  | 1.25       | 0.14          | 80.11               | 1.44                   | A300A   |
| 2016329       | 19:03 | 11.91      | -88.90      | 10.00            | 45.82        | 13.13         | 89.77    | 43.16   | 286.81       | 68.00  | 19.75 | 0.68       | 0.31          | 96.83               | 0.69                   | A300A   |
| 2017010       | 06:33 | 4.48       | 122.62      | 627.00           | 45.82        | 13.13         | 100.21   | 317.94  | 72.74        | 47.00  | 8.75  | 0.88       | 0.19          | 71.93               | 1.34                   | A300A   |
| 2017140       | 01:26 | 9.38       | 123.95      | 533.00           | 45.82        | 13.13         | 97.44    | 318.76  | 68.47        | 48.00  | 7.75  | 1.38       | 0.11          | 80.01               | 0.99                   | A300A   |
| 2017173       | 12:51 | 13.72      | -90.97      | 38.00            | 45.82        | 13.13         | 89.83    | 42.71   | 289.51       | 61.00  | 8.75  | 0.85       | 0.10          | 101.36              | 0.39                   | A300A   |
| 2017196       | 12:32 | 0.41       | 121.98      | 113.00           | 45.82        | 13.13         | 102.76   | 317.27  | 76.00        | 21.00  | 23.50 | 0.80       | 0.23          | 65.15               | 2.21                   | A300A   |
| 2017266       | 13:13 | 16.63      | -95.08      | 10.00            | 45.82        | 13.13         | 90.35    | 41.63   | 294.40       | 62.00  | 19.75 | 0.57       | 0.21          | 105.59              | 1.60                   | A300A   |
| 2018084       | 20:34 | -6.63      | 129.82      | 169.00           | 45.82        | 13.13         | 113.21   | 317.17  | 74.94        | 60.00  | 21.50 | 1.12       | 0.76          | 82.90               | 0.67                   | A300A   |
| 2018092       | 14:00 | -20.66     | -63.01      | 559.00           | 45.82        | 13.13         | 95.38    | 43.00   | 245.95       | 73.00  | 5.00  | 0.57       | 0.16          | 241.19              | 0.16                   | A300A   |
| 2018229       | 15:55 | -7.37      | 119.80      | 529.00           | 45.82        | 13.13         | 106.86   | 315.57  | 83.14        | 68.00  | 12.00 | 1.10       | 0.29          | 91.67               | 0.66                   | A300A   |
| 2018240       | 22:55 | 16.80      | 146.84      | 55.00            | 45.82        | 13.13         | 104.93   | 328.46  | 45.77        | 67.00  | 7.50  | 1.02       | 0.14          | 222.44              | 0.81                   | A300A   |
| 2018271       | 10:22 | -0.18      | 119.84      | 10.00            | 45.82        | 13.13         | 101.73   | 316.84  | 78.01        | 46.00  | 16.50 | 0.72       | 0.23          | 80.69               | 0.54                   | A300A   |
| 2017049       | 12:30 | -23.86     | -66.66      | 222.00           | 46.48        | 10.37         | 98.55    | 42.92   | 244.45       | 62.00  | 13.00 | 1.65       | 0.60          | 232.12              | 0.62                   | BRMO    |
| 2017105       | 08:39 | -23.27     | -67.72      | 155.00           | 46.48        | 10.37         | 98.79    | 43.18   | 245.58       | 66.00  | 26.00 | 1.15       | 0.99          | 233.73              | 1.09                   | BRMO    |
| 2017140       | 01:26 | 9.38       | 123.95      | 533.00           | 46.48        | 10.37         | 98.96    | 320.12  | 66.29        | 51.00  | 13.75 | 1.00       | 0.38          | 63.45               | 1.22                   | BRMO    |
| 2017243       | 17:26 | -1.16      | 99.69       | 43.00            | 46.48        | 10.37         | 90.36    | 316.29  | 91.29        | 68.00  | 22.50 | 1.72       | 0.81          | 83.20               | 1.56                   | BRMO    |
| 2018240       | 22:55 | 16.80      | 146.84      | 55.00            | 46.48        | 10.37         | 105.80   | 330.35  | 43.29        | 53.00  | 24.75 | 0.75       | 0.98          | 219.03              | 0.83                   | BRMO    |
| 2015135       | 20:46 | -2.54      | 102.22      | 151.00           | 45.62        | 10.52         | 92.99    | 315.37  | 90.56        | 17.00  | 16.50 | 1.42       | 0.37          | 81.36               | 0.98                   | SALO    |
| 2015155       | 23:35 | 5.99       | 116.54      | 10.00            | 45.62        | 10.52         | 96.82    | 317.20  | 74.33        | 64.00  | 6.00  | 2.05       | 0.45          | 80.01               | 1.48                   | SALO    |
| 2015261       | 09:30 | -32.37     | -72.23      | 8.00             | 45.62        | 10.52         | 107.74   | 46.97   | 241.81       | 27.00  | 10.00 | 1.12       | 0.18          | 76.97               | 1.30                   | SALO    |
| 2015311       | 07:51 | -30.88     | -71.45      | 46.00            | 45.62        | 10.52         | 106.23   | 46.37   | 242.46       | 72.00  | 7.25  | 2.02       | 0.68          | 242.69              | 0.66                   | SALO    |
| 2016153       | 23:16 | -2.10      | 100.67      | 50.00            | 45.62        | 10.52         | 91.59    | 315.40  | 91.36        | 23.00  | 2.75  | 1.17       | 0.06          | 85.43               | 0.08                   | SALO    |
| 2016211       | 21:38 | 18.54      | 145.51      | 196.00           | 45.62        | 10.52         | 104.22   | 329.20  | 43.81        | 81.00  | 17.00 | 0.85       | 0.29          | 230.20              | 0.71                   | SALO    |
| 2016217       | 14:35 | -22.33     | -66.01      | 270.00           | 45.62        | 10.52         | 96.76    | 43.42   | 245.06       | 83.00  | 18.50 | 1.02       | 0.45          | 252.72              | 0.52                   | SALO    |
| 2016217       | 16:44 | 24.94      | 142.01      | 510.00           | 45.62        | 10.52         | 97.09    | 328.01  | 43.26        | 66.00  | 13.25 | 1.42       | 0.21          | 212.39              | 0.70                   | SALO    |
| 2016238       | 17:24 | 30.61      | 137.85      | 456.00           | 45.62        | 10.52         | 90.34    | 326.08  | 43.28        | 79.00  | 4.25  | 1.35       | 0.07          | 225.65              | 0.53                   | SALO    |

| DATE (YYYYJJ) | TIME  | Event Lat. | Event Long. | Event depth (km) | Station Lat. | Station Long. | Distance | Azimuth | Back Azimuth | Phi    | dPhi  | Delay Time | d(Delay Time) | Source Polarization | d(Source Polarization) | Station |
|---------------|-------|------------|-------------|------------------|--------------|---------------|----------|---------|--------------|--------|-------|------------|---------------|---------------------|------------------------|---------|
| 2017010       | 06:33 | 4.48       | 122.62      | 627.00           | 45.62        | 10.52         | 102.00   | 318.33  | 70.80        | 45.00  | 13.50 | 1.40       | 0.39          | 70.98               | 2.19                   | SALO    |
| 2017243       | 17:26 | -1.16      | 99.69       | 43.00            | 45.62        | 10.52         | 90.24    | 315.43  | 91.40        | 44.00  | 25.75 | 0.90       | 0.49          | 97.99               | 0.48                   | SALO    |
| 2016139       | 08:17 | 0.43       | -79.79      | 16.00            | 45.76        | 10.12         | 89.63    | 44.43   | 270.23       | 79.00  | 21.50 | 0.75       | 0.41          | 96.61               | 0.64                   | ZONE    |
| 2016211       | 21:38 | 18.54      | 145.51      | 196.00           | 45.76        | 10.12         | 104.31   | 329.51  | 43.44        | -81.00 | 16.50 | 0.80       | 0.22          | 46.27               | 1.07                   | ZONE    |
| 2016217       | 16:44 | 24.94      | 142.01      | 510.00           | 45.76        | 10.12         | 97.17    | 328.32  | 42.93        | 76.00  | 5.50  | 1.07       | 0.07          | 218.46              | 0.40                   | ZONE    |
| 2016325       | 21:17 | -31.62     | -68.63      | 108.00           | 45.76        | 10.12         | 104.84   | 45.25   | 239.95       | 66.00  | 12.25 | 2.65       | 0.86          | 236.13              | 1.14                   | ZONE    |
| 2016329       | 19:03 | 11.91      | -88.90      | 10.00            | 45.76        | 10.12         | 87.76    | 43.78   | 284.67       | 40.00  | 22.50 | 0.55       | 0.61          | 106.84              | 0.28                   | ZONE    |
| 2017196       | 12:32 | 0.41       | 121.98      | 113.00           | 45.76        | 10.12         | 104.81   | 317.78  | 73.73        | 40.00  | 11.50 | 1.52       | 0.28          | 86.41               | 2.51                   | ZONE    |
| 2017243       | 17:26 | -1.16      | 99.69       | 43.00            | 45.76        | 10.12         | 90.52    | 315.57  | 91.11        | 50.00  | 6.75  | 1.92       | 0.11          | 94.11               | 1.42                   | ZONE    |
| 2018092       | 14:00 | -20.66     | -63.01      | 559.00           | 45.76        | 10.12         | 93.45    | 42.15   | 243.87       | -48.00 | 4.00  | 0.65       | 0.06          | 68.17               | 0.36                   | ZONE    |
| 2018271       | 10:22 | -0.18      | 119.84      | 10.00            | 45.76        | 10.12         | 103.80   | 317.27  | 75.76        | 40.00  | 11.50 | 1.15       | 0.17          | 78.63               | 0.36                   | ZONE    |
| 2016153       | 23:16 | -2.10      | 100.67      | 50.00            | 45.31        | 11.17         | 91.12    | 315.11  | 91.83        | 47.00  | 5.50  | 1.27       | 0.06          | 96.63               | 0.35                   | OPPE    |
| 2016207       | 17:46 | -26.11     | -70.51      | 72.00            | 45.31        | 11.17         | 102.61   | 45.69   | 245.73       | -14.00 | 2.25  | 1.62       | 0.28          | 69.63               | 0.23                   | OPPE    |
| 2017243       | 17:26 | -1.16      | 99.69       | 43.00            | 45.31        | 11.17         | 89.77    | 315.13  | 91.86        | 49.00  | 11.25 | 1.15       | 0.16          | 99.45               | 1.42                   | OPPE    |
| 2018229       | 15:55 | -7.37      | 119.80      | 529.00           | 45.31        | 11.17         | 108.29   | 315.23  | 81.85        | 59.00  | 8.25  | 1.23       | 0.20          | 86.79               | 1.07                   | OPPE    |
| 2015161       | 14:12 | -22.40     | -68.43      | 124.00           | 45.87        | 8.77          | 97.34    | 43.39   | 245.49       | 70.00  | 11.50 | 1.35       | 0.42          | 230.13              | 0.83                   | VARE    |
| 2015184       | 07:03 | 10.17      | 125.89      | 32.00            | 45.87        | 8.77          | 100.84   | 320.71  | 63.15        | 58.00  | 2.50  | 3.42       | 0.22          | 70.23               | 0.33                   | VARE    |
| 2016207       | 17:46 | -26.11     | -70.51      | 72.00            | 45.87        | 8.77          | 101.32   | 44.44   | 244.28       | -69.00 | 10.00 | 0.82       | 0.11          | 57.60               | 0.29                   | VARE    |
| 2016217       | 16:44 | 24.94      | 142.01      | 510.00           | 45.87        | 8.77          | 97.73    | 329.09  | 41.87        | 65.00  | 4.50  | 0.72       | 0.07          | 220.95              | 0.17                   | VARE    |
| 2016234       | 04:05 | -55.31     | -31.75      | 12.00            | 45.87        | 8.77          | 106.46   | 28.25   | 202.79       | 75.00  | 8.25  | 1.17       | 0.13          | 197.26              | 1.59                   | VARE    |
| 2016293       | 00:46 | -4.86      | 108.16      | 614.00           | 45.87        | 8.77          | 100.01   | 315.57  | 86.65        | 74.00  | 5.25  | 2.42       | 0.45          | 93.04               | 3.51                   | VARE    |
| 2017105       | 08:39 | -23.27     | -67.72      | 155.00           | 45.87        | 8.77          | 97.52    | 43.26   | 244.41       | 82.00  | 16.00 | 0.68       | 0.24          | 233.00              | 0.62                   | VARE    |
| 2017196       | 12:32 | 0.41       | 121.98      | 113.00           | 45.87        | 8.77          | 105.68   | 318.16  | 72.66        | 55.00  | 10.25 | 1.82       | 0.36          | 77.87               | 1.40                   | VARE    |
| 2018229       | 15:55 | -7.37      | 119.80      | 529.00           | 45.87        | 8.77          | 109.87   | 316.10  | 79.86        | 72.00  | 4.50  | 2.45       | 0.59          | 82.15               | 1.02                   | VARE    |
| 2018231       | 15:16 | -8.32      | 116.63      | 21.00            | 45.87        | 8.77          | 108.36   | 315.52  | 82.94        | 74.00  | 6.25  | 1.88       | 0.60          | 89.87               | 0.92                   | VARE    |
| 2018236       | 09:24 | -11.04     | -70.83      | 630.00           | 45.87        | 8.77          | 90.70    | 43.42   | 254.95       | -62.00 | 24.75 | 0.52       | 0.96          | 65.57               | 0.94                   | VARE    |
| 2018240       | 22:55 | 16.80      | 146.84      | 55.00            | 45.87        | 8.77          | 107.00   | 330.77  | 42.01        | 78.00  | 23.75 | 0.32       | 0.79          | 220.67              | 1.91                   | VARE    |
| 2015351       | 20:09 | 15.80      | -93.63      | 85.00            | 48.99        | 8.49          | 85.96    | 40.21   | 289.34       | 35.00  | 17.75 | 1.60       | 0.84          | 109.98              | 0.59                   | A126A   |
| 2019113       | 05:57 | 11.76      | 125.23      | 56.00            | 48.88        | 6.38          | 99.20    | 324.15  | 60.33        | -33.00 | 5.25  | 1.60       | 0.32          | 72.06               | 0.87                   | A151A   |
| 2017105       | 08:39 | -23.27     | -67.72      | 155.00           | 48.00        | 5.73          | 96.61    | 40.40   | 242.55       | -25.00 | 4.25  | 1.90       | 0.58          | 57.71               | 0.84                   | A157A   |
| 2016153       | 23:16 | -2.10      | 100.67      | 50.00            | 48.01        | 6.35          | 94.45    | 317.81  | 88.20        | 87.00  | 0.75  | 2.35       | 0.09          | 256.50              | 0.08                   | A158A   |
| 2016157       | 16:45 | -4.59      | 125.63      | 429.00           | 48.01        | 6.35          | 112.72   | 320.58  | 70.50        | 83.00  | 18.75 | 1.52       | 0.93          | 247.91              | 1.81                   | A158A   |
| 2016159       | 11:11 | 18.36      | -105.17     | 10.00            | 48.01        | 6.35          | 90.11    | 38.66   | 297.93       | 45.00  | 21.75 | 1.50       | 0.68          | 125.56              | 0.22                   | A158A   |
| 2016159       | 19:35 | 1.28       | 126.37      | 31.00            | 48.01        | 6.35          | 108.63   | 322.15  | 65.99        | 80.00  | 9.50  | 1.07       | 0.23          | 234.94              | 1.24                   | A158A   |
| 2016211       | 21:38 | 18.54      | 145.51      | 196.00           | 48.01        | 6.35          | 104.35   | 333.05  | 39.82        | -73.00 | 12.50 | 1.17       | 0.31          | 38.74               | 0.49                   | A158A   |
| 2016238       | 17:24 | 30.61      | 137.85      | 456.00           | 48.01        | 6.35          | 90.47    | 329.80  | 40.22        | -62.00 | 31.25 | 1.27       | 0.94          | 49.57               | 1.56                   | A158A   |
| 2017196       | 12:32 | 0.41       | 121.98      | 113.00           | 48.01        | 6.35          | 106.57   | 320.83  | 70.16        | 76.00  | 26.75 | 0.97       | 0.49          | 241.23              | 0.68                   | A158A   |
| 2018084       | 20:34 | -6.63      | 129.82      | 169.00           | 48.01        | 6.35          | 116.93   | 321.08  | 68.35        | -70.00 | 15.75 | 0.85       | 0.16          | 70.15               | 1.04                   | A158A   |
| 2018229       | 15:55 | -7.37      | 119.80      | 529.00           | 48.01        | 6.35          | 111.07   | 318.69  | 77.19        | -78.00 | 14.75 | 1.02       | 0.30          | 69.21               | 2.48                   | A158A   |
| 2018250       | 02:32 | -2.35      | -78.90      | 93.00            | 48.01        | 6.35          | 88.55    | 42.02   | 264.91       | 21.00  | 14.25 | 0.72       | 0.21          | 88.01               | 0.14                   | A158A   |
| 2016267       | 23:13 | 6.57       | 126.49      | 65.00            | 47.69        | 5.05          | 105.44   | 323.27  | 61.57        | -76.00 | 25.50 | 1.85       | 0.47          | 69.42               | 4.36                   | A160A   |
| 2017196       | 12:32 | 0.41       | 121.98      | 113.00           | 47.69        | 5.05          | 107.50   | 320.83  | 69.20        | 67.00  | 24.50 | 2.88       | 0.62          | 240.49              | 3.18                   | A160A   |
| 2017283       | 06:52 | -18.57     | -69.75      | 85.00            | 47.20        | 5.20          | 93.64    | 41.29   | 246.62       | -1.00  | 14.75 | 0.68       | 0.17          | 65.39               | 1.09                   | A163A   |
| 2018092       | 14:00 | -20.66     | -63.01      | 559.00           | 47.20        | 5.20          | 91.12    | 39.30   | 240.43       | -10.00 | 27.00 | 0.90       | 0.97          | 64.47               | 1.12                   | A163A   |
| 2016201       | 05:38 | -30.25     | -71.97      | 8.00             | 46.33        | 6.68          | 104.09   | 44.46   | 241.01       | 41.00  | 12.25 | 1.88       | 0.44          | 70.52               | 3.95                   | A173A   |
| 2016207       | 17:46 | -26.11     | -70.51      | 72.00            | 46.33        | 6.68          | 100.22   | 43.36   | 242.98       | 1.00   | 25.25 | 1.23       | 0.90          | 66.23               | 0.91                   | A173A   |
| 2016211       | 21:38 | 18.54      | 145.51      | 196.00           | 46.33        | 6.68          | 105.49   | 331.75  | 40.40        | -5.00  | 22.00 | 0.52       | 0.47          | 48.55               | 0.51                   | A173A   |

| DATE (YYYYJJ) | TIME  | Event Lat. | Event Long. | Event depth (km) | Station Lat. | Station Long. | Distance | Azimuth | Back Azimuth | Phi    | dPhi  | Delay Time | d(Delay Time) | Source Polarization | d(Source Polarization) | Station |
|---------------|-------|------------|-------------|------------------|--------------|---------------|----------|---------|--------------|--------|-------|------------|---------------|---------------------|------------------------|---------|
| 2016213       | 11:53 | -56.26     | -27.54      | 99.00            | 46.33        | 6.68          | 106.18   | 23.94   | 199.07       | -44.00 | 2.75  | 1.38       | 0.07          | 18.26               | 0.53                   | A173A   |
| 2016217       | 14:35 | -22.33     | -66.01      | 270.00           | 46.33        | 6.68          | 94.67    | 41.59   | 242.49       | 44.00  | 18.00 | 1.32       | 0.60          | 69.51               | 2.02                   | A173A   |
| 2016217       | 16:44 | 24.94      | 142.01      | 510.00           | 46.33        | 6.68          | 98.34    | 330.50  | 40.17        | 20.00  | 8.25  | 0.95       | 0.12          | 52.51               | 0.98                   | A173A   |
| 2016232       | 07:52 | -55.29     | -31.88      | 10.00            | 46.33        | 6.68          | 106.35   | 26.75   | 201.81       | -1.00  | 8.50  | 1.38       | 0.28          | 27.03               | 0.69                   | A173A   |
| 2016238       | 17:24 | 30.61      | 137.85      | 456.00           | 46.33        | 6.68          | 91.60    | 328.55  | 40.49        | 26.00  | 19.75 | 1.05       | 0.36          | 54.36               | 2.87                   | A173A   |
| 2016293       | 00:45 | -4.86      | 108.16      | 614.00           | 46.33        | 6.68          | 101.43   | 316.15  | 85.04        | 1.00   | 5.00  | 2.52       | 0.41          | 76.80               | 1.31                   | A173A   |
| 2017010       | 06:33 | 4.48       | 122.62      | 627.00           | 46.33        | 6.68          | 104.26   | 319.99  | 67.67        | 6.00   | 11.50 | 1.67       | 0.57          | 79.20               | 1.27                   | A173A   |
| 2017105       | 08:39 | -23.27     | -67.72      | 155.00           | 46.33        | 6.68          | 96.42    | 42.19   | 243.04       | 55.00  | 22.50 | 1.40       | 0.93          | 67.11               | 0.63                   | A173A   |
| 2017130       | 23:43 | -56.41     | -25.74      | 15.00            | 46.33        | 6.68          | 105.92   | 22.73   | 198.05       | -9.00  | 3.00  | 1.85       | 0.09          | 26.23               | 0.48                   | A173A   |
| 2017196       | 12:32 | 0.41       | 121.98      | 113.00           | 46.33        | 6.68          | 106.92   | 319.09  | 70.90        | 13.00  | 13.50 | 1.82       | 0.57          | 81.67               | 4.66                   | A173A   |
| 2017263       | 16:57 | 37.98      | 144.66      | 11.00            | 46.33        | 6.68          | 87.99    | 332.35  | 31.96        | -13.00 | 13.25 | 1.02       | 0.14          | 35.32               | 0.92                   | A173A   |
| 2018084       | 20:34 | -6.63      | 129.82      | 169.00           | 46.33        | 6.68          | 117.32   | 319.23  | 69.44        | 4.00   | 4.75  | 2.25       | 0.41          | 82.59               | 0.77                   | A173A   |
| 2018092       | 14:00 | -20.66     | -63.01      | 559.00           | 46.33        | 6.68          | 91.59    | 40.55   | 241.47       | -11.00 | 5.25  | 1.30       | 0.26          | 61.38               | 0.64                   | A173A   |
| 2018229       | 15:55 | -7.37      | 119.80      | 529.00           | 46.33        | 6.68          | 111.21   | 316.88  | 78.08        | 6.00   | 23.00 | 1.32       | 0.74          | 77.28               | 1.59                   | A173A   |
| 2016159       | 19:35 | 1.28       | 126.37      | 31.00            | 48.83        | 5.92          | 108.55   | 323.06  | 65.38        | 70.00  | 3.00  | 2.47       | 0.27          | 235.34              | 0.71                   | A210A   |
| 2016211       | 21:38 | 18.54      | 145.51      | 196.00           | 48.83        | 5.92          | 103.90   | 333.81  | 39.32        | -89.00 | 8.25  | 0.90       | 0.10          | 38.56               | 0.25                   | A210A   |
| 2016217       | 14:35 | -22.33     | -66.01      | 270.00           | 48.83        | 5.92          | 95.38    | 39.13   | 242.15       | 78.00  | 24.25 | 0.70       | 0.54          | 231.59              | 2.10                   | A210A   |
| 2016217       | 16:44 | 24.94      | 142.01      | 510.00           | 48.83        | 5.92          | 96.74    | 332.51  | 39.35        | 68.00  | 11.00 | 0.75       | 0.16          | 220.10              | 0.53                   | A210A   |
| 2016238       | 17:24 | 30.61      | 137.85      | 456.00           | 48.83        | 5.92          | 90.02    | 330.55  | 39.90        | 65.00  | 3.00  | 0.97       | 0.04          | 213.71              | 0.16                   | A210A   |
| 2016293       | 00:45 | -4.86      | 108.16      | 614.00           | 48.83        | 5.92          | 101.70   | 318.74  | 83.97        | 1.00   | 19.75 | 1.15       | 0.39          | 81.57               | 0.41                   | A210A   |
| 2017105       | 08:39 | -23.27     | -67.72      | 155.00           | 48.83        | 5.92          | 97.10    | 39.72   | 242.77       | 84.00  | 12.50 | 1.07       | 0.31          | 239.05              | 1.58                   | A210A   |
| 2017196       | 12:32 | 0.41       | 121.98      | 113.00           | 48.83        | 5.92          | 106.56   | 321.73  | 69.58        | -52.00 | 17.50 | 0.60       | 0.17          | 70.51               | 1.93                   | A210A   |
| 2017223       | 05:48 | 14.01      | 120.74      | 172.00           | 48.83        | 5.92          | 95.09    | 322.97  | 62.19        | 68.00  | 11.00 | 1.38       | 0.88          | 230.72              | 2.83                   | A210A   |
| 2018092       | 14:00 | -20.66     | -63.01      | 559.00           | 48.83        | 5.92          | 92.34    | 38.11   | 241.00       | -57.00 | 13.75 | 0.68       | 0.17          | 56.58               | 0.61                   | A210A   |
| 2016153       | 23:16 | -2.10      | 100.67      | 50.00            | 48.41        | 6.62          | 94.25    | 318.20  | 88.37        | 86.00  | 3.50  | 1.90       | 0.34          | 97.25               | 0.58                   | A211A   |
| 2016217       | 16:44 | 24.94      | 142.01      | 510.00           | 48.41        | 6.62          | 96.77    | 331.89  | 39.94        | 60.00  | 5.50  | 1.02       | 0.24          | 225.66              | 0.34                   | A211A   |
| 2016238       | 17:24 | 30.61      | 137.85      | 456.00           | 48.41        | 6.62          | 90.05    | 329.93  | 40.42        | 79.00  | 5.25  | 1.17       | 0.07          | 220.81              | 0.84                   | A211A   |
| 2017052       | 14:29 | -19.28     | -63.90      | 595.00           | 48.41        | 6.62          | 92.00    | 38.94   | 243.01       | 87.00  | 16.50 | 0.62       | 0.25          | 247.06              | 0.64                   | A211A   |
| 2017283       | 06:52 | -18.57     | -69.75      | 85.00            | 48.41        | 6.62          | 95.00    | 40.54   | 247.73       | 68.00  | 3.75  | 1.72       | 0.29          | 234.56              | 0.53                   | A211A   |
| 2016211       | 21:38 | 18.54      | 145.51      | 196.00           | 47.50        | 5.48          | 105.11   | 333.18  | 39.15        | -69.00 | 21.75 | 0.85       | 0.54          | 38.30               | 0.74                   | A213A   |
| 2016238       | 17:24 | 30.61      | 137.85      | 456.00           | 47.50        | 5.48          | 91.24    | 329.93  | 39.58        | -73.00 | 18.25 | 1.12       | 0.36          | 49.51               | 2.74                   | A213A   |
| 2018092       | 14:00 | -20.66     | -63.01      | 559.00           | 47.50        | 5.48          | 91.43    | 39.13   | 240.64       | 59.00  | 1.75  | 1.60       | 0.09          | 75.02               | 0.36                   | A213A   |
| 2018250       | 02:32 | -2.35      | -78.90      | 93.00            | 47.50        | 5.48          | 87.91    | 42.48   | 264.28       | 86.00  | 4.75  | 1.75       | 0.41          | 96.72               | 0.50                   | A213A   |
| 2016207       | 17:46 | -26.11     | -70.51      | 72.00            | 46.36        | 5.80          | 99.70    | 43.05   | 242.40       | 69.00  | 23.25 | 3.10       | 0.67          | 242.83              | 0.58                   | A214A   |
| 2016211       | 21:38 | 18.54      | 145.51      | 196.00           | 46.36        | 5.80          | 105.85   | 332.26  | 39.63        | 31.00  | 3.00  | 1.42       | 0.23          | 43.22               | 0.14                   | A214A   |
| 2016217       | 14:35 | -22.33     | -66.01      | 270.00           | 46.36        | 5.80          | 94.15    | 41.27   | 241.88       | 69.00  | 26.50 | 3.42       | 0.81          | 240.56              | 3.03                   | A214A   |
| 2016217       | 16:44 | 24.94      | 142.01      | 510.00           | 46.36        | 5.80          | 98.70    | 331.00  | 39.46        | 8.00   | 13.50 | 0.52       | 0.12          | 38.55               | 0.18                   | A214A   |
| 2016232       | 07:52 | -55.29     | -31.88      | 10.00            | 46.36        | 5.80          | 106.15   | 26.15   | 201.35       | -16.00 | 9.50  | 1.05       | 0.16          | 25.76               | 0.45                   | A214A   |
| 2016238       | 17:24 | 30.61      | 137.85      | 456.00           | 46.36        | 5.80          | 91.97    | 329.03  | 39.83        | 34.00  | 2.25  | 1.48       | 0.18          | 45.61               | 0.18                   | A214A   |
| 2016293       | 00:45 | -4.86      | 108.16      | 614.00           | 46.36        | 5.80          | 102.03   | 316.24  | 84.39        | 52.00  | 26.00 | 0.65       | 0.84          | 90.70               | 3.46                   | A214A   |
| 2017049       | 12:30 | -23.86     | -66.66      | 222.00           | 46.36        | 5.80          | 95.69    | 41.57   | 241.32       | -14.00 | 7.75  | 2.15       | 0.59          | 62.82               | 1.24                   | A214A   |
| 2017283       | 06:52 | -18.57     | -69.75      | 85.00            | 46.36        | 5.80          | 93.69    | 42.22   | 247.00       | 79.00  | 9.50  | 1.32       | 0.48          | 246.56              | 0.89                   | A214A   |
| 2015150       | 11:43 | 27.84      | 140.49      | 664.00           | 46.04        | 5.57          | 95.86    | 330.28  | 39.08        | 42.00  | 20.25 | 1.57       | 0.54          | 50.69               | 0.42                   | OG35    |
| 2016201       | 05:38 | -30.25     | -71.97      | 8.00             | 46.04        | 5.57          | 103.28   | 44.33   | 240.24       | 83.00  | 20.75 | 0.75       | 0.40          | 242.63              | 1.26                   | OG35    |
| 2017052       | 14:29 | -19.28     | -63.90      | 595.00           | 46.04        | 5.57          | 90.27    | 40.71   | 242.21       | 79.00  | 3.75  | 2.77       | 0.59          | 251.55              | 0.49                   | OG35    |
| 2017108       | 18:09 | -2.71      | -75.30      | 14.00            | 46.04        | 5.57          | 85.60    | 43.61   | 261.56       | 85.00  | 8.25  | 2.02       | 0.39          | 246.74              | 1.80                   | OG35    |
| 2017223       | 05:48 | 14.01      | 120.74      | 172.00           | 46.04        | 5.57          | 96.60    | 320.61  | 62.17        | 37.00  | 10.25 | 1.90       | 0.30          | 71.02               | 3.61                   | OG35    |

| DATE (YYYYJJ) | TIME  | Event Lat. | Event Long. | Event depth (km) | Station Lat. | Station Long. | Distance | Azimuth | Back Azimuth | Phi    | dPhi  | Delay Time | d(Delay Time) | Source Polarization | d(Source Polarization) | Station |
|---------------|-------|------------|-------------|------------------|--------------|---------------|----------|---------|--------------|--------|-------|------------|---------------|---------------------|------------------------|---------|
| 2017225       | 03:28 | -3.77      | 101.62      | 31.00            | 46.04        | 5.57          | 96.90    | 315.76  | 88.27        | 4.00   | 12.50 | 1.75       | 0.59          | 81.16               | 1.32                   | OG35    |
| 2017263       | 16:57 | 37.98      | 144.66      | 11.00            | 46.04        | 5.57          | 88.64    | 332.85  | 31.18        | 4.00   | 19.50 | 0.52       | 0.33          | 37.67               | 0.62                   | OG35    |
| 2018014       | 09:38 | -15.77     | -74.71      | 39.00            | 46.04        | 5.57          | 94.62    | 43.53   | 252.20       | -27.00 | 21.50 | 0.92       | 0.54          | 82.10               | 0.53                   | OG35    |
| 2018363       | 03:59 | 5.90       | 126.92      | 60.00            | 46.04        | 5.57          | 106.69   | 321.61  | 62.49        | -11.00 | 9.00  | 1.80       | 0.53          | 64.71               | 1.35                   | OG35    |
| 2019005       | 19:45 | -8.14      | -71.59      | 570.00           | 46.04        | 5.57          | 87.00    | 42.85   | 255.16       | -28.00 | 25.00 | 0.92       | 0.96          | 81.64               | 0.51                   | OG35    |
| 2016153       | 23:16 | -2.10      | 100.67      | 50.00            | 45.88        | 5.89          | 94.83    | 315.68  | 88.03        | -63.00 | 24.50 | 0.57       | 0.98          | 94.63               | 0.92                   | OGMY    |
| 2016207       | 17:46 | -26.11     | -70.51      | 72.00            | 45.88        | 5.89          | 99.53    | 43.51   | 242.39       | 69.00  | 2.75  | 2.55       | 0.47          | 240.14              | 0.54                   | OGMY    |
| 2016211       | 21:38 | 18.54      | 145.51      | 196.00           | 45.88        | 5.89          | 106.18   | 331.89  | 39.79        | -30.00 | 12.75 | 0.92       | 0.35          | 44.73               | 0.20                   | OGMY    |
| 2016217       | 16:44 | 24.94      | 142.01      | 510.00           | 45.88        | 5.89          | 99.04    | 330.64  | 39.58        | -33.00 | 4.00  | 1.38       | 0.18          | 40.31               | 0.11                   | OGMY    |
| 2016293       | 00:45 | -4.86      | 108.16      | 614.00           | 45.88        | 5.89          | 102.01   | 315.74  | 84.56        | -84.00 | 23.75 | 1.00       | 0.94          | 81.80               | 0.97                   | OGMY    |
| 2017052       | 14:29 | -19.28     | -63.90      | 595.00           | 45.88        | 5.89          | 90.39    | 40.96   | 242.43       | 81.00  | 23.50 | 1.15       | 0.54          | 247.43              | 1.14                   | OGMY    |
| 2017223       | 05:48 | 14.01      | 120.74      | 172.00           | 45.88        | 5.89          | 96.48    | 320.36  | 62.43        | 3.00   | 20.75 | 0.55       | 0.37          | 73.32               | 0.70                   | OGMY    |
| 2017283       | 06:51 | -18.57     | -69.75      | 85.00            | 45.88        | 5.89          | 93.56    | 42.69   | 247.03       | 79.00  | 22.75 | 1.75       | 0.64          | 251.15              | 0.76                   | OGMY    |
| 2018092       | 13:59 | -20.66     | -63.01      | 559.00           | 45.88        | 5.89          | 90.89    | 40.68   | 240.90       | 73.00  | 19.50 | 1.40       | 0.61          | 245.60              | 0.67                   | OGMY    |
| 2019005       | 19:45 | -8.14      | -71.59      | 570.00           | 45.88        | 5.89          | 87.18    | 43.06   | 255.40       | 77.00  | 8.00  | 2.38       | 0.59          | 242.54              | 1.05                   | OGMY    |
| 2019060       | 09:10 | -14.71     | -70.15      | 267.00           | 45.88        | 5.89          | 91.00    | 42.69   | 249.92       | -72.00 | 20.25 | 0.75       | 0.79          | 73.81               | 0.49                   | OGMY    |
| 2019113       | 05:57 | 11.76      | 125.23      | 56.00            | 45.88        | 5.89          | 100.97   | 321.66  | 60.41        | 4.00   | 17.00 | 1.07       | 0.34          | 64.96               | 0.81                   | OGMY    |
| 2015082       | 05:11 | -18.35     | -69.17      | 130.00           | 45.61        | 5.70          | 92.80    | 42.72   | 246.63       | -35.00 | 7.25  | 1.07       | 0.29          | 68.49               | 0.22                   | OGSM    |
| 2015150       | 11:43 | 27.84      | 140.49      | 664.00           | 45.61        | 5.70          | 96.15    | 329.93  | 39.20        | -20.00 | 22.50 | 0.65       | 0.46          | 37.61               | 0.75                   | OGSM    |
| 2015150       | 19:09 | 30.79      | 142.97      | 6.00             | 45.61        | 5.70          | 94.64    | 331.46  | 35.86        | 19.00  | 19.75 | 0.72       | 0.35          | 45.77               | 0.35                   | OGSM    |
| 2015244       | 15:45 | 31.18      | 141.60      | 8.00             | 45.61        | 5.70          | 93.73    | 330.69  | 36.70        | 18.00  | 11.50 | 0.88       | 0.21          | 43.01               | 0.37                   | OGSM    |
| 2015330       | 06:05 | -9.18      | -71.26      | 602.00           | 45.61        | 5.70          | 87.51    | 43.19   | 254.32       | -45.00 | 11.25 | 1.00       | 0.31          | 63.81               | 0.79                   | OGSM    |
| 2016153       | 23:16 | -2.10      | 100.67      | 50.00            | 45.61        | 5.70          | 94.98    | 315.42  | 87.92        | -75.00 | 15.75 | 1.50       | 0.51          | 91.84               | 0.28                   | OGSM    |
| 2016211       | 21:38 | 18.54      | 145.51      | 196.00           | 45.61        | 5.70          | 106.48   | 331.81  | 39.68        | -22.00 | 7.75  | 0.88       | 0.12          | 38.24               | 0.26                   | OGSM    |
| 2016217       | 16:44 | 24.94      | 142.01      | 510.00           | 45.61        | 5.70          | 99.33    | 330.57  | 39.45        | 1.00   | 14.00 | 0.65       | 0.11          | 43.84               | 0.55                   | OGSM    |
| 2016238       | 17:24 | 30.61      | 137.85      | 456.00           | 45.61        | 5.70          | 92.60    | 328.61  | 39.78        | 14.00  | 17.75 | 0.82       | 0.87          | 47.82               | 1.15                   | OGSM    |
| 2017243       | 17:26 | -1.16      | 99.69       | 43.00            | 45.61        | 5.70          | 93.62    | 315.44  | 87.96        | -65.00 | 22.00 | 1.30       | 0.60          | 90.25               | 2.68                   | OGSM    |
| 2017283       | 06:51 | -18.57     | -69.75      | 85.00            | 45.61        | 5.70          | 93.33    | 42.89   | 246.88       | -31.00 | 25.25 | 1.45       | 0.92          | 68.99               | 0.78                   | OGSM    |
| 2018236       | 09:23 | -11.04     | -70.83      | 630.00           | 45.61        | 5.70          | 88.56    | 43.07   | 252.75       | -29.00 | 24.75 | 1.92       | 0.77          | 71.76               | 0.55                   | OGSM    |
| 2018305       | 22:39 | -19.58     | -69.27      | 102.00           | 45.61        | 5.70          | 93.76    | 42.80   | 245.86       | -37.00 | 20.00 | 1.10       | 0.46          | 65.90               | 0.24                   | OGSM    |
| 2019006       | 17:47 | 2.26       | 126.76      | 43.00            | 45.61        | 5.70          | 109.51   | 320.36  | 65.24        | 42.00  | 16.75 | 0.85       | 0.35          | 61.30               | 1.32                   | OGSM    |
| 2016217       | 16:44 | 24.94      | 142.01      | 510.00           | 46.76        | 5.92          | 98.34    | 331.19  | 39.52        | 43.00  | 4.25  | 2.60       | 0.36          | 53.32               | 0.83                   | RIVEL   |
| 2017196       | 12:32 | 0.41       | 121.98      | 113.00           | 46.76        | 5.92          | 107.27   | 319.70  | 70.17        | 1.00   | 3.75  | 1.38       | 0.28          | 80.34               | 0.09                   | RIVEL   |
| 2017283       | 06:52 | -18.57     | -69.75      | 85.00            | 46.76        | 5.92          | 93.93    | 41.89   | 247.11       | 76.00  | 2.75  | 3.08       | 0.39          | 249.79              | 0.48                   | RIVEL   |
| 2018092       | 14:00 | -20.66     | -63.01      | 559.00           | 46.76        | 5.92          | 91.33    | 39.92   | 240.94       | -7.00  | 24.75 | 0.72       | 0.99          | 72.15               | 0.41                   | RIVEL   |
| 2015042       | 19:17 | -23.11     | -66.69      | 223.00           | 48.41        | 7.35          | 97.03    | 40.20   | 243.12       | -41.00 | 19.25 | 0.57       | 0.35          | 74.67               | 0.20                   | WLS     |
| 2015076       | 22:32 | 1.67       | 126.52      | 44.00            | 48.41        | 7.35          | 107.64   | 322.38  | 66.33        | 54.00  | 22.75 | 0.55       | 0.96          | 80.13               | 1.16                   | WLS     |
| 2015082       | 05:11 | -18.35     | -69.17      | 130.00           | 48.41        | 7.35          | 94.93    | 40.56   | 247.98       | 89.00  | 3.00  | 1.80       | 0.36          | 259.91              | 0.15                   | WLS     |
| 2015232       | 11:20 | 0.49       | 126.59      | 46.00            | 48.41        | 7.35          | 108.61   | 322.16  | 67.03        | 48.00  | 13.25 | 0.38       | 0.11          | 78.94               | 0.39                   | WLS     |
| 2016153       | 23:16 | -2.10      | 100.67      | 50.00            | 48.41        | 7.35          | 93.76    | 318.20  | 88.92        | 61.00  | 12.50 | 1.27       | 0.19          | 98.95               | 0.29                   | WLS     |
| 2016159       | 11:11 | 18.36      | -105.17     | 10.00            | 48.41        | 7.35          | 90.51    | 37.99   | 298.68       | 38.00  | 4.50  | 2.30       | 0.54          | 117.64              | 0.74                   | WLS     |
| 2016211       | 21:38 | 18.54      | 145.51      | 196.00           | 48.41        | 7.35          | 103.60   | 332.79  | 40.63        | 65.00  | 4.75  | 1.40       | 0.14          | 216.90              | 0.37                   | WLS     |
| 2016217       | 16:44 | 24.94      | 142.01      | 510.00           | 48.41        | 7.35          | 96.45    | 331.51  | 40.53        | 64.00  | 2.75  | 1.48       | 0.11          | 223.15              | 0.24                   | WLS     |
| 2016238       | 17:24 | 30.61      | 137.85      | 456.00           | 48.41        | 7.35          | 89.72    | 329.56  | 40.97        | 75.00  | 4.00  | 1.60       | 0.09          | 225.33              | 0.59                   | WLS     |
| 2016293       | 00:46 | -4.86      | 108.16      | 614.00           | 48.41        | 7.35          | 100.79   | 318.22  | 85.14        | 73.00  | 19.00 | 0.95       | 0.49          | 97.92               | 1.06                   | WLS     |
| 2017105       | 08:39 | -23.27     | -67.72      | 155.00           | 48.41        | 7.35          | 97.77    | 40.52   | 243.74       | -51.00 | 27.75 | 1.45       | 0.89          | 69.10               | 1.98                   | WLS     |
| 2017243       | 17:26 | -1.16      | 99.69       | 43.00            | 48.41        | 7.35          | 92.42    | 318.22  | 89.03        | 65.00  | 8.50  | 1.77       | 0.24          | 97.26               | 1.13                   | WLS     |

| DATE (YYYYJJ) | TIME  | Event Lat. | Event Long. | Event depth (km) | Station Lat. | Station Long. | Distance | Azimuth | Back Azimuth | Phi    | dPhi  | Delay Time | d(Delay Time) | Source Polarization | d(Source Polarization) | Station |
|---------------|-------|------------|-------------|------------------|--------------|---------------|----------|---------|--------------|--------|-------|------------|---------------|---------------------|------------------------|---------|
| 2018305       | 22:39 | -19.58     | -69.27      | 102.00           | 48.41        | 7.35          | 95.92    | 40.67   | 247.25       | 73.00  | 3.25  | 2.15       | 0.35          | 241.80              | 0.63                   | WLS     |
| 2016329       | 19:03 | 11.91      | -88.90      | 10.00            | 48.83        | 7.36          | 85.22    | 41.23   | 282.50       | 70.00  | 19.50 | 1.30       | 0.49          | 113.85              | 2.03                   | CIEL    |
| 2017010       | 06:33 | 4.48       | 122.62      | 627.00           | 48.83        | 7.36          | 102.88   | 322.19  | 67.66        | 81.00  | 2.25  | 1.98       | 0.35          | 254.30              | 0.46                   | CIEL    |
| 2017243       | 17:26 | -1.16      | 99.69       | 43.00            | 48.83        | 7.36          | 92.40    | 318.64  | 89.02        | 42.00  | 3.25  | 1.08       | 0.04          | 94.24               | 0.25                   | CIEL    |
| 2017283       | 06:52 | -18.57     | -69.75      | 85.00            | 48.83        | 7.36          | 95.61    | 40.33   | 248.30       | 76.00  | 24.75 | 2.03       | 0.63          | 248.48              | 0.58                   | CIEL    |
| 2018092       | 14:00 | -20.66     | -63.01      | 559.00           | 48.83        | 7.36          | 93.18    | 38.56   | 242.06       | 71.00  | 3.75  | 2.00       | 0.56          | 243.93              | 0.54                   | CIEL    |
| 2018209       | 23:07 | -8.24      | 116.51      | 14.00            | 48.83        | 7.36          | 108.75   | 318.76  | 80.91        | 45.00  | 15.75 | 1.02       | 0.27          | 88.87               | 2.24                   | CIEL    |
| 2018231       | 04:30 | -8.34      | 116.60      | 16.00            | 48.83        | 7.36          | 108.88   | 318.75  | 80.91        | 65.00  | 26.00 | 1.70       | 0.98          | 76.60               | 1.20                   | CIEL    |
| 2018251       | 07:35 | 7.24       | 126.48      | 10.00            | 48.83        | 7.36          | 103.00   | 323.67  | 62.82        | 21.00  | 21.50 | 0.70       | 0.93          | 70.43               | 1.78                   | CIEL    |
| 2018084       | 20:34 | -6.63      | 129.82      | 169.00           | 47.55        | 11.44         | 113.84   | 319.34  | 72.85        | 55.00  | 14.00 | 1.25       | 0.29          | 76.71               | 1.19                   | A140A   |
| 2018100       | 10:39 | -31.03     | -71.53      | 66.00            | 47.55        | 11.44         | 107.83   | 44.93   | 243.50       | -4.00  | 12.50 | 1.10       | 0.33          | 66.05               | 0.88                   | A140A   |
| 2018200       | 13:51 | 17.93      | -97.72      | 48.00            | 47.55        | 11.44         | 89.23    | 39.79   | 295.92       | -75.00 | 6.75  | 0.75       | 0.26          | 296.52              | 0.22                   | A140A   |
| 2018209       | 23:07 | -8.24      | 116.51      | 14.00            | 47.55        | 11.44         | 106.21   | 317.07  | 84.45        | 78.00  | 8.75  | 2.02       | 0.87          | 88.46               | 1.12                   | A140A   |
| 2018221       | 05:45 | -8.31      | 116.23      | 15.00            | 47.55        | 11.44         | 106.07   | 317.03  | 84.71        | 76.00  | 8.25  | 1.72       | 0.43          | 95.97               | 1.46                   | A140A   |
| 2018229       | 15:55 | -7.37      | 119.80      | 529.00           | 47.55        | 11.44         | 107.78   | 317.53  | 81.33        | 57.00  | 18.50 | 1.20       | 0.47          | 81.41               | 2.26                   | A140A   |
| 2018231       | 15:16 | -8.32      | 116.63      | 21.00            | 47.55        | 11.44         | 106.35   | 317.06  | 84.41        | 57.00  | 8.00  | 1.70       | 0.27          | 86.52               | 1.89                   | A140A   |
| 2018236       | 09:24 | -11.04     | -70.83      | 630.00           | 47.55        | 11.44         | 92.89    | 42.23   | 256.92       | 14.00  | 15.25 | 0.32       | 0.09          | 72.72               | 0.14                   | A140A   |
| 2018240       | 22:55 | 16.80      | 146.84      | 55.00            | 47.55        | 11.44         | 104.52   | 330.58  | 44.00        | 71.00  | 2.00  | 1.30       | 0.08          | 231.12              | 0.62                   | A140A   |
| 2018250       | 02:32 | -2.35      | -78.90      | 93.00            | 47.55        | 11.44         | 91.94    | 42.67   | 268.67       | 40.00  | 18.75 | 0.52       | 0.26          | 85.80               | 0.18                   | A140A   |
| 2016159       | 11:11 | 18.36      | -105.17     | 10.00            | 48.10        | 12.08         | 93.39    | 36.65   | 302.24       | -82.00 | 21.50 | 2.05       | 0.66          | 294.66              | 1.16                   | A144A   |
| 2018231       | 15:16 | -8.32      | 116.63      | 21.00            | 48.10        | 12.08         | 105.86   | 317.58  | 84.75        | 68.00  | 4.00  | 2.25       | 0.33          | 83.44               | 1.24                   | A144A   |
| 2018236       | 09:24 | -11.04     | -70.83      | 630.00           | 48.10        | 12.08         | 93.44    | 41.79   | 257.42       | -2.00  | 18.25 | 0.80       | 0.36          | 75.10               | 0.18                   | A144A   |
| 2018240       | 22:55 | 16.80      | 146.84      | 55.00            | 48.10        | 12.08         | 103.82   | 330.65  | 44.46        | 71.00  | 10.75 | 1.35       | 0.28          | 225.56              | 4.13                   | A144A   |
| 2016153       | 23:16 | -2.10      | 100.67      | 50.00            | 47.75        | 11.85         | 90.74    | 317.57  | 92.28        | 81.00  | 4.75  | 1.45       | 0.19          | 103.42              | 0.50                   | A141A   |
| 2016238       | 17:24 | 30.61      | 137.85      | 456.00           | 47.75        | 11.85         | 88.17    | 326.89  | 44.25        | -85.00 | 8.75  | 1.17       | 0.14          | 52.68               | 1.60                   | A141A   |
| 2016329       | 19:03 | 11.91      | -88.90      | 10.00            | 47.75        | 11.85         | 88.39    | 41.55   | 285.85       | 61.00  | 8.75  | 0.80       | 0.06          | 108.09              | 0.18                   | A141A   |
| 2017181       | 22:49 | -0.28      | -80.49      | 13.00            | 47.75        | 11.85         | 91.78    | 42.42   | 271.54       | 24.00  | 9.25  | 1.57       | 0.43          | 93.51               | 1.80                   | A141A   |
| 2017196       | 12:32 | 0.41       | 121.98      | 113.00           | 47.75        | 11.85         | 103.12   | 319.42  | 74.59        | 68.00  | 22.00 | 0.92       | 0.47          | 82.75               | 0.88                   | A141A   |
| 2017243       | 17:26 | -1.16      | 99.69       | 43.00            | 47.75        | 11.85         | 89.39    | 317.60  | 92.37        | 80.00  | 6.50  | 1.77       | 0.25          | 105.59              | 1.14                   | A141A   |
| 2018021       | 01:26 | -18.88     | -69.44      | 116.00           | 47.75        | 11.85         | 98.08    | 42.35   | 250.97       | 72.00  | 24.25 | 1.40       | 0.72          | 86.41               | 2.81                   | A141A   |
| 2018200       | 13:51 | 17.93      | -97.72      | 48.00            | 47.75        | 11.85         | 89.39    | 39.48   | 296.22       | 40.00  | 16.25 | 1.67       | 0.64          | 113.00              | 2.71                   | A141A   |
| 2018217       | 12:06 | -8.26      | 116.44      | 34.00            | 47.75        | 11.85         | 105.88   | 317.24  | 84.77        | 76.00  | 5.00  | 1.70       | 0.38          | 90.81               | 1.03                   | A141A   |
| 2018221       | 05:45 | -8.31      | 116.23      | 15.00            | 47.75        | 11.85         | 105.77   | 317.22  | 84.96        | 57.00  | 25.25 | 1.35       | 0.94          | 77.09               | 3.05                   | A141A   |
| 2018229       | 15:55 | -7.37      | 119.80      | 529.00           | 47.75        | 11.85         | 107.48   | 317.70  | 81.58        | 72.00  | 23.25 | 1.85       | 0.82          | 82.10               | 1.54                   | A141A   |
| 2018240       | 22:55 | 16.80      | 146.84      | 55.00            | 47.75        | 11.85         | 104.18   | 330.51  | 44.32        | 79.00  | 6.00  | 1.00       | 0.14          | 233.25              | 0.85                   | A141A   |
| 2018250       | 02:32 | -2.35      | -78.90      | 93.00            | 47.75        | 11.85         | 92.23    | 42.47   | 268.98       | 21.00  | 22.50 | 0.65       | 0.54          | 84.30               | 0.47                   | A141A   |
| 2016153       | 23:16 | -2.10      | 100.67      | 50.00            | 47.87        | 12.40         | 90.38    | 317.70  | 92.68        | 88.00  | 2.25  | 2.40       | 0.15          | 100.47              | 0.23                   | A145A   |
| 2016159       | 11:11 | 18.36      | -105.17     | 10.00            | 47.87        | 12.40         | 93.70    | 36.74   | 302.47       | 48.00  | 14.25 | 0.77       | 0.26          | 106.89              | 0.30                   | A145A   |
| 2016159       | 19:35 | 1.28       | 126.37      | 31.00            | 47.87        | 12.40         | 104.90   | 320.46  | 70.96        | 73.00  | 9.00  | 0.97       | 0.33          | 240.73              | 0.55                   | A145A   |
| 2018200       | 13:51 | 17.93      | -97.72      | 48.00            | 47.87        | 12.40         | 89.67    | 39.22   | 296.62       | 71.00  | 11.50 | 1.17       | 0.17          | 124.44              | 0.87                   | A145A   |
| 2018231       | 15:16 | -8.32      | 116.63      | 21.00            | 47.87        | 12.40         | 105.67   | 317.32  | 85.05        | 62.00  | 1.25  | 1.72       | 0.07          | 81.58               | 0.14                   | A145A   |
| 2016106       | 14:31 | 13.40      | -92.37      | 22.00            | 47.68        | 11.00         | 88.99    | 41.11   | 288.76       | 83.00  | 29.25 | 1.02       | 0.52          | 121.69              | 0.83                   | A143A   |
| 2016139       | 08:17 | 0.43       | -79.79      | 16.00            | 47.68        | 11.00         | 90.22    | 42.50   | 270.87       | 73.00  | 21.50 | 1.32       | 0.66          | 97.03               | 1.44                   | A143A   |
| 2016153       | 23:16 | -2.10      | 100.67      | 50.00            | 47.68        | 11.00         | 91.31    | 317.48  | 91.66        | 61.00  | 14.25 | 1.25       | 0.23          | 94.63               | 0.82                   | A143A   |
| 2016157       | 16:45 | -4.59      | 125.63      | 429.00           | 47.68        | 11.00         | 109.83   | 319.23  | 74.43        | 41.00  | 29.25 | 1.85       | 0.52          | 74.14               | 2.92                   | A143A   |
| 2016159       | 11:11 | 18.36      | -105.17     | 10.00            | 47.68        | 11.00         | 93.00    | 37.39   | 301.40       | 51.00  | 11.75 | 1.62       | 0.59          | 128.44              | 0.94                   | A143A   |
| 2016159       | 19:35 | 1.28       | 126.37      | 31.00            | 47.68        | 11.00         | 105.85   | 320.61  | 69.89        | 58.00  | 22.50 | 0.90       | 0.89          | 73.67               | 1.96                   | A143A   |

| DATE (YYYYJJ) | TIME  | Event Lat. | Event Long. | Event depth (km) | Station Lat. | Station Long. | Distance | Azimuth | Back Azimuth | Phi    | dPhi  | Delay Time | d(Delay Time) | Source Polarization | d(Source Polarization) | Station |
|---------------|-------|------------|-------------|------------------|--------------|---------------|----------|---------|--------------|--------|-------|------------|---------------|---------------------|------------------------|---------|
| 2016201       | 05:38 | -30.25     | -71.97      | 8.00             | 47.68        | 11.00         | 107.34   | 44.63   | 244.12       | 10.00  | 21.00 | 0.57       | 0.47          | 65.14               | 1.04                   | A143A   |
| 2016207       | 17:46 | -26.11     | -70.51      | 72.00            | 47.68        | 11.00         | 103.47   | 43.41   | 246.13       | 56.00  | 8.75  | 1.35       | 0.46          | 67.13               | 0.38                   | A143A   |
| 2016211       | 21:38 | 18.54      | 145.51      | 196.00           | 47.68        | 11.00         | 102.50   | 330.42  | 43.87        | 79.00  | 22.00 | 0.70       | 0.52          | 226.76              | 1.00                   | A143A   |
| 2016238       | 17:24 | 30.61      | 137.85      | 456.00           | 47.68        | 11.00         | 88.62    | 327.26  | 43.64        | 72.00  | 16.00 | 1.25       | 0.32          | 223.91              | 2.31                   | A143A   |
| 2016329       | 19:03 | 11.91      | -88.90      | 10.00            | 47.68        | 11.00         | 87.86    | 41.77   | 285.24       | 60.00  | 18.75 | 1.00       | 0.38          | 109.99              | 1.95                   | A143A   |
| 2017010       | 06:33 | 4.48       | 122.62      | 627.00           | 47.68        | 11.00         | 101.01   | 320.21  | 70.78        | 63.00  | 5.25  | 2.10       | 0.34          | 81.04               | 0.97                   | A143A   |
| 2017105       | 08:39 | -23.27     | -67.72      | 155.00           | 47.68        | 11.00         | 99.68    | 42.24   | 246.19       | 53.00  | 25.00 | 1.15       | 0.97          | 66.07               | 0.73                   | A143A   |
| 2017130       | 23:42 | -56.41     | -25.74      | 15.00            | 47.68        | 11.00         | 108.17   | 25.18   | 200.49       | -79.00 | 7.75  | 1.30       | 0.22          | 35.49               | 0.48                   | A143A   |
| 2017173       | 12:51 | 13.72      | -90.97      | 38.00            | 47.68        | 11.00         | 87.85    | 41.41   | 287.94       | 38.00  | 13.75 | 1.20       | 0.37          | 101.85              | 0.62                   | A143A   |
| 2017196       | 12:32 | 0.41       | 121.98      | 113.00           | 47.68        | 11.00         | 103.69   | 319.51  | 73.95        | 41.00  | 26.75 | 0.95       | 0.56          | 71.30               | 3.58                   | A143A   |
| 2017223       | 05:48 | 14.01      | 120.74      | 172.00           | 47.68        | 11.00         | 92.53    | 320.46  | 66.14        | 64.00  | 5.50  | 1.38       | 0.33          | 78.23               | 1.00                   | A143A   |
| 2017243       | 17:26 | -1.16      | 99.69       | 43.00            | 47.68        | 11.00         | 89.96    | 317.51  | 91.75        | 71.00  | 8.25  | 1.42       | 0.17          | 106.06              | 1.68                   | A143A   |
| 2017266       | 10:58 | 15.49      | -94.43      | 53.00            | 47.68        | 11.00         | 88.72    | 40.65   | 291.63       | -74.00 | 7.75  | 1.62       | 0.43          | 300.71              | 1.10                   | A143A   |
| 2017283       | 06:52 | -18.57     | -69.75      | 85.00            | 47.68        | 11.00         | 97.49    | 42.27   | 250.79       | 50.00  | 25.75 | 0.92       | 0.98          | 73.52               | 2.06                   | A143A   |
| 2018014       | 09:37 | -15.77     | -74.71      | 39.00            | 47.68        | 11.00         | 98.65    | 42.97   | 256.22       | 27.00  | 24.50 | 0.77       | 0.87          | 78.48               | 2.05                   | A143A   |
| 2018084       | 20:34 | -6.63      | 129.82      | 169.00           | 47.68        | 11.00         | 114.09   | 319.57  | 72.44        | 60.00  | 19.25 | 1.70       | 0.95          | 70.90               | 2.11                   | A143A   |
| 2018181       | 04:16 | 19.02      | -105.12     | 15.00            | 47.68        | 11.00         | 92.44    | 37.39   | 301.77       | 54.00  | 5.00  | 1.27       | 0.24          | 126.95              | 0.90                   | A143A   |
| 2018200       | 13:51 | 17.93      | -97.72      | 48.00            | 47.68        | 11.00         | 88.91    | 39.80   | 295.60       | 38.00  | 5.75  | 2.17       | 0.40          | 111.62              | 1.38                   | A143A   |
| 2018209       | 23:07 | -8.24      | 116.51      | 14.00            | 47.68        | 11.00         | 106.49   | 317.23  | 84.08        | 36.00  | 25.50 | 1.42       | 0.87          | 77.78               | 2.12                   | A143A   |
| 2018217       | 12:06 | -8.26      | 116.44      | 34.00            | 47.68        | 11.00         | 106.45   | 317.22  | 84.15        | 53.00  | 20.50 | 1.05       | 0.47          | 86.36               | 2.54                   | A143A   |
| 2018229       | 15:55 | -7.37      | 119.80      | 529.00           | 47.68        | 11.00         | 108.05   | 317.72  | 80.95        | 79.00  | 6.25  | 2.17       | 0.56          | 91.94               | 1.18                   | A143A   |
| 2018250       | 02:32 | -2.35      | -78.90      | 93.00            | 47.68        | 11.00         | 91.66    | 42.53   | 268.35       | 62.00  | 11.25 | 1.05       | 0.19          | 94.83               | 0.84                   | A143A   |
| 2018305       | 22:39 | -19.58     | -69.27      | 102.00           | 48.45        | 8.93          | 96.90    | 41.03   | 248.39       | 30.00  | 14.50 | 0.77       | 0.18          | 67.40               | 0.65                   | A100A   |
| 2019006       | 17:47 | 2.26       | 126.76      | 43.00            | 48.45        | 8.93          | 106.34   | 322.16  | 67.05        | 68.00  | 3.75  | 1.40       | 0.41          | 75.42               | 0.68                   | A100A   |
| 2019020       | 01:52 | -30.04     | -71.38      | 63.00            | 48.45        | 8.93          | 105.93   | 43.03   | 242.73       | 54.00  | 17.50 | 1.10       | 0.38          | 72.24               | 1.52                   | A100A   |
| 2019060       | 09:10 | -14.71     | -70.15      | 267.00           | 48.45        | 8.93          | 93.80    | 40.93   | 252.21       | 0.00   | 24.25 | 1.07       | 0.94          | 66.70               | 0.74                   | A100A   |
| 2018305       | 22:39 | -19.58     | -69.27      | 102.00           | 48.12        | 8.55          | 96.54    | 41.25   | 248.08       | 51.00  | 22.25 | 0.50       | 0.46          | 68.02               | 0.41                   | A101B   |
| 2019006       | 17:47 | 2.26       | 126.76      | 43.00            | 48.12        | 8.55          | 106.70   | 321.94  | 66.83        | -2.00  | 21.50 | 0.90       | 0.50          | 68.53               | 1.11                   | A101B   |
| 2019053       | 10:37 | -2.19      | -77.05      | 145.00           | 48.12        | 8.55          | 88.67    | 41.93   | 265.28       | 5.00   | 4.00  | 1.45       | 0.34          | 81.93               | 0.19                   | A101B   |
| 2019060       | 09:10 | -14.71     | -70.15      | 267.00           | 48.12        | 8.55          | 93.45    | 41.17   | 251.92       | 7.00   | 17.50 | 1.20       | 0.47          | 71.03               | 0.61                   | A101B   |
| 2019091       | 18:59 | -18.21     | 65.37       | 10.00            | 48.12        | 8.55          | 83.22    | 325.61  | 126.76       | 13.00  | 20.25 | 0.52       | 0.39          | 48.46               | 0.72                   | A101B   |
| 2019096       | 22:15 | -6.85      | 125.02      | 539.00           | 48.12        | 8.55          | 112.61   | 319.47  | 74.34        | 61.00  | 24.75 | 0.72       | 0.94          | 99.94               | 3.34                   | A101B   |
| 2018305       | 22:39 | -19.58     | -69.27      | 102.00           | 48.14        | 9.20          | 96.96    | 41.39   | 248.54       | 15.00  | 20.50 | 0.62       | 0.32          | 70.11               | 0.84                   | A102A   |
| 2019005       | 19:45 | -8.14      | -71.59      | 570.00           | 48.14        | 9.20          | 89.90    | 41.39   | 257.77       | 2.00   | 26.50 | 0.88       | 0.98          | 70.54               | 2.17                   | A102A   |
| 2019053       | 10:37 | -2.19      | -77.05      | 145.00           | 48.14        | 9.20          | 89.11    | 41.95   | 265.76       | 5.00   | 2.75  | 1.60       | 0.27          | 83.81               | 0.41                   | A102A   |
| 2019060       | 09:10 | -14.71     | -70.15      | 267.00           | 48.14        | 9.20          | 93.88    | 41.28   | 252.39       | 38.00  | 9.25  | 0.72       | 0.09          | 78.05               | 0.34                   | A102A   |
| 2018305       | 22:39 | -19.58     | -69.27      | 102.00           | 47.80        | 9.55          | 97.05    | 41.79   | 248.76       | 42.00  | 19.25 | 1.50       | 0.64          | 65.88               | 3.08                   | A103D   |
| 2018363       | 03:59 | 5.90       | 126.92      | 60.00            | 47.80        | 9.55          | 103.47   | 322.00  | 65.28        | 55.00  | 10.50 | 1.60       | 0.19          | 85.21               | 0.53                   | A103D   |
| 2019005       | 19:45 | -8.14      | -71.59      | 570.00           | 47.80        | 9.55          | 90.06    | 41.77   | 258.03       | 49.00  | 26.00 | 1.67       | 0.57          | 79.99               | 2.01                   | A103D   |
| 2019006       | 17:47 | 2.26       | 126.76      | 43.00            | 47.80        | 9.55          | 106.21   | 321.36  | 67.73        | 38.00  | 13.25 | 1.75       | 0.34          | 82.16               | 3.56                   | A103D   |
| 2018363       | 03:59 | 5.90       | 126.92      | 60.00            | 48.35        | 9.83          | 103.07   | 322.43  | 65.39        | 64.00  | 2.25  | 3.08       | 0.14          | 74.44               | 0.18                   | A108A   |
| 2019005       | 19:45 | -8.14      | -71.59      | 570.00           | 48.35        | 9.83          | 90.36    | 41.27   | 258.24       | 66.00  | 3.25  | 2.35       | 0.38          | 76.33               | 0.32                   | A108A   |
| 2019020       | 01:52 | -30.04     | -71.38      | 63.00            | 48.35        | 9.83          | 106.42   | 43.42   | 243.30       | 49.00  | 8.75  | 1.10       | 0.22          | 72.29               | 0.97                   | A108A   |
| 2019053       | 10:37 | -2.19      | -77.05      | 145.00           | 48.35        | 9.83          | 89.54    | 41.77   | 266.23       | 72.00  | 4.50  | 1.95       | 0.43          | 86.51               | 0.27                   | A108A   |
| 2019060       | 09:10 | -14.71     | -70.15      | 267.00           | 48.35        | 9.83          | 94.34    | 41.21   | 252.87       | 63.00  | 2.25  | 2.30       | 0.39          | 73.75               | 0.20                   | A108A   |
| 2018363       | 03:59 | 5.90       | 126.92      | 60.00            | 48.44        | 9.46          | 103.25   | 322.63  | 65.07        | 78.00  | 17.75 | 0.85       | 0.33          | 237.94              | 0.55                   | A109A   |
| 2019005       | 19:45 | -8.14      | -71.59      | 570.00           | 48.44        | 9.46          | 90.14    | 41.13   | 257.96       | 57.00  | 8.75  | 1.72       | 0.59          | 71.07               | 0.45                   | A109A   |



| DATE<br>(YYYYJJ) | TIME  | Event<br>Lat. | Event<br>Long. | Event<br>depth<br>(km) | Statio<br>n Lat. | Station<br>Long. | Distan<br>ce | Azimuth | Back<br>Azimut<br>h | Phi   | dPhi  | Delay<br>Time | d(Del<br>ay<br>Time) | Source<br>Polarizati<br>on | d(Sour<br>ce<br>Polariz<br>ation) | Station |
|------------------|-------|---------------|----------------|------------------------|------------------|------------------|--------------|---------|---------------------|-------|-------|---------------|----------------------|----------------------------|-----------------------------------|---------|
| 2019053          | 10:37 | -2.19         | -77.05         | 145.00                 | 48.44            | 9.46             | 89.30        | 41.66   | 265.95              | 69.00 | 24.00 | 0.95          | 0.97                 | 86.36                      | 1.25                              | A109A   |
| 2019060          | 09:10 | -14.71        | -70.15         | 267.00                 | 48.44            | 9.46             | 94.13        | 41.04   | 252.60              | 1.00  | 19.25 | 0.80          | 0.45                 | 70.75                      | 0.24                              | A109A   |
| 2019113          | 05:57 | 11.76         | 125.23         | 56.00                  | 48.44            | 9.46             | 97.61        | 322.78  | 62.84               | 72.00 | 11.00 | 1.23          | 0.32                 | 231.52                     | 1.25                              | A109A   |

Table 2 Supplementary Material - Null measurements

| DATE (YYYYJJ) | TIME  | Event Lat. | Event Long. | Event depth (km) | Station Lat. | Station Long. | Distance | Azimuth | Back Azimuth | Station |
|---------------|-------|------------|-------------|------------------|--------------|---------------|----------|---------|--------------|---------|
| 2019053       | 10:37 | -2.19      | -77.05      | 145.00           | 48.45        | 8.93          | 88.95    | 41.62   | 265.55       | A100A   |
| 2019005       | 19:45 | -8.14      | -71.59      | 570.00           | 48.12        | 8.55          | 89.47    | 41.32   | 257.28       | A101B   |
| 2019020       | 01:52 | -30.04     | -71.38      | 63.00            | 48.12        | 8.55          | 105.55   | 43.22   | 242.40       | A101B   |
| 2019113       | 05:57 | 11.76      | 125.23      | 56.00            | 48.12        | 8.55          | 98.30    | 322.77  | 62.16        | A101B   |
| 2019006       | 17:47 | 2.26       | 126.76      | 43.00            | 48.14        | 9.20          | 106.29   | 321.78  | 67.36        | A102A   |
| 2019113       | 05:57 | 11.76      | 125.23      | 56.00            | 48.14        | 9.20          | 97.90    | 322.58  | 62.67        | A102A   |
| 2018305       | 22:39 | -19.58     | -69.27      | 102.00           | 48.35        | 9.83          | 97.43    | 41.35   | 249.02       | A108A   |
| 2019006       | 17:47 | 2.26       | 126.76      | 43.00            | 48.35        | 9.83          | 105.83   | 321.82  | 67.82        | A108A   |
| 2019134       | 13:18 | -4.08      | 152.57      | 10.00            | 48.35        | 9.83          | 125.61   | 330.21  | 47.97        | A108A   |
| 2015315       | 02:14 | -29.51     | -72.01      | 12.00            | 48.99        | 8.49          | 105.90   | 42.50   | 243.37       | A126A   |
| 2018305       | 22:39 | -19.58     | -69.27      | 102.00           | 48.88        | 6.38          | 95.51    | 39.98   | 246.59       | A151A   |
| 2019005       | 19:45 | -8.14      | -71.59      | 570.00           | 48.88        | 6.38          | 88.25    | 40.23   | 255.64       | A151A   |
| 2019053       | 10:37 | -2.19      | -77.05      | 145.00           | 48.88        | 6.38          | 87.31    | 41.03   | 263.62       | A151A   |
| 2019060       | 09:10 | -14.71     | -70.15      | 267.00           | 48.88        | 6.38          | 92.34    | 39.98   | 250.36       | A151A   |
| 2017049       | 12:30 | -23.86     | -66.66      | 222.00           | 48.00        | 5.73          | 96.43    | 40.10   | 241.42       | A157A   |
| 2015328       | 23:05 | -10.54     | -70.94      | 606.00           | 48.01        | 6.35          | 89.39    | 40.93   | 253.60       | A158A   |
| 2016207       | 17:46 | -26.11     | -70.51      | 72.00            | 48.01        | 6.35          | 100.78   | 41.74   | 243.04       | A158A   |
| 2017010       | 06:33 | 4.48       | 122.62      | 627.00           | 48.01        | 6.35          | 103.82   | 321.68  | 67.02        | A158A   |
| 2017243       | 17:26 | -1.16      | 99.69       | 43.00            | 48.01        | 6.35          | 93.10    | 317.83  | 88.30        | A158A   |
| 2018236       | 09:24 | -11.04     | -70.83      | 630.00           | 48.01        | 6.35          | 89.70    | 40.90   | 253.19       | A158A   |
| 2017243       | 17:26 | -1.16      | 99.69       | 43.00            | 47.69        | 5.05          | 93.98    | 317.54  | 87.35        | A160A   |
| 2018231       | 15:16 | -8.32      | 116.63      | 21.00            | 47.69        | 5.05          | 110.60   | 317.84  | 79.46        | A160A   |
| 2018236       | 09:24 | -11.04     | -70.83      | 630.00           | 47.69        | 5.05          | 88.77    | 40.95   | 252.23       | A160A   |
| 2018271       | 10:22 | -0.18      | 119.84      | 10.00            | 47.69        | 5.05          | 106.59   | 320.21  | 71.32        | A160A   |
| 2016207       | 17:46 | -26.11     | -70.51      | 72.00            | 47.20        | 5.20          | 99.72    | 42.10   | 242.13       | A163A   |
| 2016211       | 21:38 | 18.54      | 145.51      | 196.00           | 47.20        | 5.20          | 105.47   | 333.14  | 38.95        | A163A   |
| 2016267       | 00:33 | 34.46      | 141.64      | 10.00            | 47.20        | 5.20          | 89.79    | 331.97  | 34.71        | A163A   |
| 2018236       | 09:24 | -11.04     | -70.83      | 630.00           | 47.20        | 5.20          | 88.71    | 41.45   | 252.35       | A163A   |
| 2018271       | 10:21 | -0.18      | 119.84      | 10.00            | 47.20        | 5.20          | 106.65   | 319.69  | 71.58        | A163A   |
| 2018014       | 09:38 | -15.77     | -74.71      | 39.00            | 46.33        | 6.68          | 95.44    | 43.49   | 253.00       | A173A   |
| 2018250       | 02:32 | -2.35      | -78.90      | 93.00            | 46.33        | 6.68          | 88.63    | 43.71   | 265.20       | A173A   |
| 2017283       | 06:52 | -18.57     | -69.75      | 85.00            | 48.83        | 5.92          | 94.73    | 39.98   | 247.25       | A210A   |
| 2016159       | 19:35 | 1.28       | 126.37      | 31.00            | 48.41        | 6.62          | 108.30   | 322.46  | 66.10        | A211A   |
| 2017010       | 06:33 | 4.48       | 122.62      | 627.00           | 48.41        | 6.62          | 103.50   | 321.98  | 67.15        | A211A   |
| 2016153       | 23:16 | -2.10      | 100.67      | 50.00            | 47.50        | 5.48          | 95.05    | 317.32  | 87.60        | A213A   |
| 2016232       | 07:52 | -55.29     | -31.88      | 10.00            | 47.50        | 5.48          | 107.13   | 25.50   | 201.30       | A213A   |
| 2016293       | 00:45 | -4.86      | 108.16      | 614.00           | 47.50        | 5.48          | 102.13   | 317.42  | 83.91        | A213A   |
| 2017283       | 06:52 | -18.57     | -69.75      | 85.00            | 47.50        | 5.48          | 93.94    | 41.09   | 246.84       | A213A   |
| 2018236       | 09:24 | -11.04     | -70.83      | 630.00           | 47.50        | 5.48          | 88.98    | 41.22   | 252.55       | A213A   |
| 2015259       | 23:14 | -31.57     | -71.67      | 22.00            | 7.13         | 47.85         | 118.79   | 99.82   | 237.94       | MOF     |
| 2018014       | 09:38 | -15.77     | -74.71      | 39.00            | 7.13         | 47.85         | 123.20   | 91.74   | 255.88       | MOF     |
| 2015042       | 19:17 | -23.11     | -66.69      | 223.00           | 46.04        | 5.57          | 94.86    | 41.74   | 241.65       | OG35    |
| 2015082       | 05:11 | -18.35     | -69.17      | 130.00           | 46.04        | 5.57          | 92.89    | 42.28   | 246.56       | OG35    |

| DATE (YYYYJJ) | TIME  | Event Lat. | Event Long. | Event depth (km) | Station Lat. | Station Long. | Distance | Azimuth | Back Azimuth | Station |
|---------------|-------|------------|-------------|------------------|--------------|---------------|----------|---------|--------------|---------|
| 2015161       | 14:12 | -22.40     | -68.43      | 124.00           | 46.04        | 5.57          | 95.41    | 42.26   | 243.33       | OG35    |
| 2016153       | 23:16 | -2.10      | 100.67      | 50.00            | 46.04        | 5.57          | 95.05    | 315.86  | 87.79        | OG35    |
| 2016217       | 16:44 | 24.94      | 142.01      | 510.00           | 46.04        | 5.57          | 99.05    | 330.92  | 39.31        | OG35    |
| 2017105       | 08:39 | -23.27     | -67.72      | 155.00           | 46.04        | 5.57          | 95.61    | 42.09   | 242.25       | OG35    |
| 2017283       | 06:52 | -18.57     | -69.75      | 85.00            | 46.04        | 5.57          | 93.42    | 42.45   | 246.82       | OG35    |
| 2018271       | 10:22 | -0.18      | 119.84      | 10.00            | 46.04        | 5.57          | 106.77   | 318.46  | 72.20        | OG35    |
| 2018305       | 22:39 | -19.58     | -69.27      | 102.00           | 46.04        | 5.57          | 93.86    | 42.36   | 245.80       | OG35    |
| 2017010       | 06:32 | 4.48       | 122.62      | 627.00           | 45.88        | 5.89          | 104.94   | 319.78  | 67.16        | OGMY    |
| 2018271       | 10:21 | -0.18      | 119.84      | 10.00            | 45.88        | 5.89          | 106.61   | 318.23  | 72.49        | OGMY    |
| 2018305       | 22:39 | -19.58     | -69.27      | 102.00           | 45.88        | 5.89          | 93.99    | 42.60   | 246.01       | OGMY    |
| 2015042       | 19:17 | -23.11     | -66.69      | 223.00           | 45.61        | 5.70          | 94.73    | 42.17   | 241.71       | OGSM    |
| 2015161       | 14:12 | -22.40     | -68.43      | 124.00           | 45.61        | 5.70          | 95.29    | 42.69   | 243.38       | OGSM    |
| 2015262       | 05:26 | -29.64     | -72.08      | 6.00             | 45.61        | 5.70          | 102.77   | 44.70   | 240.74       | OGSM    |
| 2016207       | 17:46 | -26.11     | -70.51      | 72.00            | 45.61        | 5.70          | 99.28    | 43.69   | 242.22       | OGSM    |
| 2016293       | 00:45 | -4.86      | 108.16      | 614.00           | 45.61        | 5.70          | 102.17   | 315.48  | 84.48        | OGSM    |
| 2017010       | 06:32 | 4.48       | 122.62      | 627.00           | 45.61        | 5.70          | 105.17   | 319.58  | 67.07        | OGSM    |
| 2017049       | 12:30 | -23.86     | -66.66      | 222.00           | 45.61        | 5.70          | 95.26    | 42.20   | 241.18       | OGSM    |
| 2017105       | 08:39 | -23.27     | -67.72      | 155.00           | 45.61        | 5.70          | 95.48    | 42.52   | 242.30       | OGSM    |
| 2018271       | 10:21 | -0.18      | 119.84      | 10.00            | 45.61        | 5.70          | 106.82   | 318.00  | 72.42        | OGSM    |
| 2016153       | 23:16 | -2.10      | 100.67      | 50.00            | 46.76        | 5.92          | 94.78    | 316.56  | 87.99        | RIVEL   |
| 2016157       | 16:45 | -4.59      | 125.63      | 429.00           | 46.76        | 5.92          | 113.41   | 319.40  | 70.65        | RIVEL   |
| 2016159       | 11:11 | 18.36      | -105.17     | 10.00            | 46.76        | 5.92          | 90.44    | 39.90   | 297.61       | RIVEL   |
| 2016207       | 17:46 | -26.11     | -70.51      | 72.00            | 46.76        | 5.92          | 99.95    | 42.73   | 242.55       | RIVEL   |
| 2016211       | 21:38 | 18.54      | 145.51      | 196.00           | 46.76        | 5.92          | 105.49   | 332.45  | 39.66        | RIVEL   |
| 2016293       | 00:45 | -4.86      | 108.16      | 614.00           | 46.76        | 5.92          | 101.91   | 316.63  | 84.40        | RIVEL   |
| 2017010       | 06:33 | 4.48       | 122.62      | 627.00           | 46.76        | 5.92          | 104.57   | 320.61  | 66.97        | RIVEL   |
| 2016326       | 21:19 | 37.39      | 141.39      | 9.00             | 6.65         | 47.71         | 88.93    | 277.48  | 52.65        | RONF    |
| 2016207       | 17:46 | -26.11     | -70.51      | 72.00            | 48.41        | 7.35          | 101.56   | 41.67   | 243.80       | WLS     |
| 2016232       | 07:52 | -55.29     | -31.88      | 10.00            | 48.41        | 7.35          | 108.45   | 26.37   | 202.42       | WLS     |
| 2017010       | 06:33 | 4.48       | 122.62      | 627.00           | 48.41        | 7.35          | 103.04   | 321.80  | 67.74        | WLS     |
| 2017283       | 06:52 | -18.57     | -69.75      | 85.00            | 48.41        | 7.35          | 95.45    | 40.72   | 248.26       | WLS     |
| 2018092       | 14:00 | -20.66     | -63.01      | 559.00           | 48.41        | 7.35          | 92.97    | 38.93   | 242.03       | WLS     |
| 2018209       | 23:07 | -8.24      | 116.51      | 14.00            | 48.41        | 7.35          | 108.82   | 318.33  | 81.04        | WLS     |
| 2018236       | 09:24 | -11.04     | -70.83      | 630.00           | 48.41        | 7.35          | 90.45    | 40.70   | 253.94       | WLS     |
| 2018250       | 02:32 | -2.35      | -78.90      | 93.00            | 48.41        | 7.35          | 89.25    | 41.67   | 265.65       | WLS     |
| 2015315       | 02:14 | -29.51     | -72.01      | 12.00            | 48.93        | 14.99         | 109.78   | 44.41   | 247.68       | A015A   |
| 2016111       | 08:53 | 0.64       | -80.21      | 14.00            | 48.93        | 14.99         | 92.95    | 41.12   | 274.34       | A015A   |
| 2016113       | 03:40 | -0.28      | -80.50      | 10.00            | 48.93        | 14.99         | 93.83    | 41.14   | 273.95       | A015A   |
| 2016129       | 07:54 | 16.41      | -97.84      | 22.00            | 48.93        | 14.99         | 91.98    | 37.45   | 297.74       | A015A   |
| 2016139       | 17:06 | 0.49       | -79.62      | 29.00            | 48.93        | 14.99         | 92.67    | 41.15   | 273.79       | A015A   |
| 2016153       | 23:16 | -2.10      | 100.67      | 50.00            | 48.93        | 14.99         | 88.72    | 318.87  | 94.63        | A015A   |
| 2016157       | 16:45 | -4.59      | 125.63      | 429.00           | 48.93        | 14.99         | 106.94   | 319.82  | 77.22        | A015A   |
| 2016217       | 14:35 | -22.33     | -66.01      | 270.00           | 48.93        | 14.99         | 100.87   | 41.55   | 248.62       | A015A   |
| 2016236       | 19:59 | -7.29      | 122.43      | 533.00           | 48.93        | 14.99         | 106.91   | 318.89  | 81.57        | A015A   |
| 2016293       | 00:46 | -4.86      | 108.16      | 614.00           | 48.93        | 14.99         | 95.71    | 318.57  | 90.81        | A015A   |

| DATE (YYYYJJ) | TIME  | Event Lat. | Event Long. | Event depth (km) | Station Lat. | Station Long. | Distance | Azimuth | Back Azimuth | Station |
|---------------|-------|------------|-------------|------------------|--------------|---------------|----------|---------|--------------|---------|
| 2016328       | 10:19 | 27.18      | 140.03      | 481.00           | 48.93        | 14.99         | 89.75    | 327.32  | 46.84        | A015A   |
| 2017010       | 06:33 | 4.48       | 122.62      | 627.00           | 48.93        | 14.99         | 98.09    | 320.59  | 73.69        | A015A   |
| 2017105       | 08:39 | -23.27     | -67.72      | 155.00           | 48.93        | 14.99         | 102.61   | 42.09   | 249.19       | A015A   |
| 2017132       | 11:01 | 12.92      | -90.06      | 16.00            | 48.93        | 14.99         | 90.00    | 39.55   | 289.69       | A015A   |
| 2017140       | 01:26 | 9.38       | 123.95      | 533.00           | 48.93        | 14.99         | 95.14    | 321.23  | 69.56        | A015A   |
| 2017173       | 12:51 | 13.72      | -90.97      | 38.00            | 48.93        | 14.99         | 89.95    | 39.35   | 290.88       | A015A   |
| 2017253       | 03:27 | 15.40      | -94.53      | 29.00            | 48.93        | 14.99         | 90.81    | 38.43   | 294.61       | A015A   |
| 2017297       | 11:07 | -7.22      | 123.07      | 553.00           | 48.93        | 14.99         | 107.27   | 318.97  | 81.02        | A015A   |
| 2017337       | 11:39 | -0.47      | -80.31      | 17.00            | 48.93        | 14.99         | 93.85    | 41.16   | 273.68       | A015A   |
| 2017349       | 17:07 | -7.49      | 108.17      | 90.00            | 48.93        | 14.99         | 97.68    | 318.36  | 92.55        | A015A   |
| 2018021       | 01:26 | -18.88     | -69.44      | 116.00           | 48.93        | 14.99         | 100.44   | 41.87   | 253.39       | A015A   |
| 2018084       | 20:34 | -6.63      | 129.82      | 169.00           | 48.93        | 14.99         | 111.18   | 320.07  | 75.22        | A015A   |
| 2016159       | 19:35 | 1.28       | 126.37      | 31.00            | 48.12        | 13.31         | 104.24   | 320.51  | 71.62        | A032A   |
| 2016293       | 00:46 | -4.86      | 108.16      | 614.00           | 48.12        | 13.31         | 96.83    | 317.75  | 89.64        | A032A   |
| 2016329       | 19:03 | 11.91      | -88.90      | 10.00            | 48.12        | 13.31         | 89.22    | 40.91   | 286.92       | A032A   |
| 2015315       | 02:14 | -29.51     | -72.01      | 12.00            | 47.48        | 13.13         | 108.06   | 45.31   | 246.00       | A033A   |
| 2015328       | 23:05 | -10.54     | -70.94      | 606.00           | 47.48        | 13.13         | 93.70    | 42.54   | 258.56       | A033A   |
| 2016139       | 08:17 | 0.43       | -79.79      | 16.00            | 47.48        | 13.13         | 91.66    | 42.67   | 272.43       | A033A   |
| 2016139       | 17:05 | 0.49       | -79.62      | 29.00            | 47.48        | 13.13         | 91.50    | 42.67   | 272.35       | A033A   |
| 2016217       | 14:34 | -22.33     | -66.01      | 270.00           | 47.48        | 13.13         | 99.16    | 42.44   | 247.08       | A033A   |
| 2017010       | 06:32 | 4.48       | 122.62      | 627.00           | 47.48        | 13.13         | 99.71    | 319.55  | 72.46        | A033A   |
| 2017105       | 08:39 | -23.27     | -67.72      | 155.00           | 47.48        | 13.13         | 100.92   | 43.00   | 247.61       | A033A   |
| 2017132       | 11:00 | 12.92      | -90.06      | 16.00            | 47.48        | 13.13         | 89.29    | 41.34   | 288.31       | A033A   |
| 2017181       | 22:49 | -0.28      | -80.49      | 13.00            | 47.48        | 13.13         | 92.66    | 42.66   | 272.47       | A033A   |
| 2017283       | 06:52 | -18.57     | -69.75      | 85.00            | 47.48        | 13.13         | 98.79    | 42.93   | 252.26       | A033A   |
| 2018209       | 23:07 | -8.24      | 116.51      | 14.00            | 47.48        | 13.13         | 105.07   | 316.89  | 85.74        | A033A   |
| 2018217       | 12:06 | -8.26      | 116.44      | 34.00            | 47.48        | 13.13         | 105.04   | 316.88  | 85.80        | A033A   |
| 2018250       | 02:32 | -2.35      | -78.90      | 93.00            | 47.48        | 13.13         | 93.09    | 42.76   | 269.90       | A033A   |
| 2018271       | 10:22 | -0.18      | 119.84      | 10.00            | 47.48        | 13.13         | 101.38   | 318.49  | 77.68        | A033A   |
| 2016153       | 23:16 | -2.10      | 100.67      | 50.00            | 46.91        | 13.08         | 89.87    | 316.76  | 93.18        | A034A   |
| 2016217       | 14:35 | -22.33     | -66.01      | 270.00           | 46.91        | 13.08         | 98.91    | 42.96   | 246.96       | A034A   |
| 2016011       | 16:58 | 3.90       | 126.86      | 13.00            | 47.20        | 12.72         | 103.23   | 320.26  | 69.27        | A035A   |
| 2016157       | 16:45 | -4.59      | 125.63      | 429.00           | 47.20        | 12.72         | 108.83   | 318.42  | 75.96        | A035A   |
| 2016159       | 19:35 | 1.28       | 126.37      | 31.00            | 47.20        | 12.72         | 104.91   | 319.73  | 71.39        | A035A   |
| 2016217       | 14:35 | -22.33     | -66.01      | 270.00           | 47.20        | 12.72         | 98.80    | 42.59   | 246.76       | A035A   |
| 2016309       | 16:40 | -35.09     | -71.05      | 90.00            | 47.20        | 12.72         | 110.97   | 46.55   | 240.81       | A035A   |
| 2017010       | 06:33 | 4.48       | 122.62      | 627.00           | 47.20        | 12.72         | 100.06   | 319.37  | 72.19        | A035A   |
| 2017049       | 12:30 | -23.86     | -66.66      | 222.00           | 47.20        | 12.72         | 100.32   | 42.94   | 246.16       | A035A   |
| 2017052       | 14:29 | -19.28     | -63.90      | 595.00           | 47.20        | 12.72         | 95.22    | 41.77   | 247.34       | A035A   |
| 2017105       | 08:39 | -23.27     | -67.72      | 155.00           | 47.20        | 12.72         | 100.55   | 43.16   | 247.29       | A035A   |
| 2017196       | 12:32 | 0.41       | 121.98      | 113.00           | 47.20        | 12.72         | 102.69   | 318.71  | 75.39        | A035A   |
| 2017283       | 06:52 | -18.57     | -69.75      | 85.00            | 47.20        | 12.72         | 98.44    | 43.11   | 251.93       | A035A   |
| 2016011       | 16:58 | 3.90       | 126.86      | 13.00            | 47.38        | 12.31         | 103.43   | 320.54  | 68.91        | A036A   |
| 2016113       | 03:23 | -0.29      | -80.50      | 10.00            | 47.38        | 12.31         | 92.12    | 42.79   | 271.87       | A036A   |
| 2016113       | 03:40 | -0.28      | -80.50      | 10.00            | 47.38        | 12.31         | 92.11    | 42.79   | 271.87       | A036A   |

| DATE (YYYYJJ) | TIME  | Event Lat. | Event Long. | Event depth (km) | Station Lat. | Station Long. | Distance | Azimuth | Back Azimuth | Station |
|---------------|-------|------------|-------------|------------------|--------------|---------------|----------|---------|--------------|---------|
| 2016207       | 17:46 | -26.11     | -70.51      | 72.00            | 47.38        | 12.31         | 104.16   | 44.06   | 246.93       | A036A   |
| 2016217       | 14:35 | -22.33     | -66.01      | 270.00           | 47.38        | 12.31         | 98.61    | 42.31   | 246.50       | A036A   |
| 2017010       | 06:33 | 4.48       | 122.62      | 627.00           | 47.38        | 12.31         | 100.27   | 319.63  | 71.84        | A036A   |
| 2017052       | 14:29 | -19.28     | -63.90      | 595.00           | 47.38        | 12.31         | 95.03    | 41.50   | 247.06       | A036A   |
| 2017105       | 08:39 | -23.27     | -67.72      | 155.00           | 47.38        | 12.31         | 100.37   | 42.88   | 247.04       | A036A   |
| 2017114       | 21:57 | -33.04     | -72.06      | 28.00            | 47.38        | 12.31         | 110.00   | 46.03   | 242.82       | A036A   |
| 2017132       | 11:00 | 12.92      | -90.06      | 16.00            | 47.38        | 12.31         | 88.79    | 41.60   | 287.71       | A036A   |
| 2017181       | 22:49 | -0.28      | -80.49      | 13.00            | 47.38        | 12.31         | 92.11    | 42.79   | 271.86       | A036A   |
| 2017337       | 11:39 | -0.47      | -80.31      | 17.00            | 47.38        | 12.31         | 92.12    | 42.79   | 271.60       | A036A   |
| 2016111       | 08:53 | 0.64       | -80.21      | 14.00            | 47.07        | 10.26         | 89.86    | 43.12   | 270.78       | A037A   |
| 2017010       | 06:33 | 4.48       | 122.62      | 627.00           | 47.07        | 10.26         | 101.69   | 319.79  | 70.32        | A037A   |
| 2017049       | 12:30 | -23.86     | -66.66      | 222.00           | 47.07        | 10.26         | 98.74    | 42.35   | 244.46       | A037A   |
| 2017283       | 06:52 | -18.57     | -69.75      | 85.00            | 47.07        | 10.26         | 96.81    | 42.69   | 250.19       | A037A   |
| 2016111       | 08:53 | 0.64       | -80.21      | 14.00            | 47.46        | 11.92         | 90.98    | 42.70   | 272.00       | A038A   |
| 2016159       | 19:35 | 1.28       | 126.37      | 31.00            | 47.46        | 11.92         | 105.34   | 320.17  | 70.68        | A038A   |
| 2016201       | 05:38 | -30.25     | -71.97      | 8.00             | 47.46        | 11.92         | 107.80   | 45.12   | 244.64       | A038A   |
| 2016325       | 21:17 | -31.62     | -68.63      | 108.00           | 47.46        | 11.92         | 106.75   | 44.34   | 241.50       | A038A   |
| 2016329       | 19:03 | 11.91      | -88.90      | 10.00            | 47.46        | 11.92         | 88.51    | 41.81   | 285.91       | A038A   |
| 2017049       | 12:30 | -23.86     | -66.66      | 222.00           | 47.46        | 11.92         | 99.93    | 42.47   | 245.65       | A038A   |
| 2018021       | 01:26 | -18.88     | -69.44      | 116.00           | 47.46        | 11.92         | 98.03    | 42.65   | 250.98       | A038A   |
| 2018092       | 14:00 | -20.66     | -63.01      | 559.00           | 47.46        | 11.92         | 95.30    | 41.15   | 245.25       | A038A   |
| 2015260       | 04:30 | -31.52     | -71.80      | 23.00            | 47.03        | 7.89          | 105.96   | 44.43   | 240.92       | A060A   |
| 2015315       | 02:14 | -29.51     | -72.01      | 12.00            | 47.10        | 8.93          | 105.31   | 44.39   | 243.19       | A061A   |
| 2016148       | 04:04 | 26.99      | 130.14      | 10.00            | 47.10        | 8.93          | 89.21    | 324.24  | 49.75        | A061A   |
| 2016159       | 11:11 | 18.36      | -105.17     | 10.00            | 47.10        | 8.93          | 92.08    | 38.61   | 299.83       | A061A   |
| 2016207       | 17:46 | -26.11     | -70.51      | 72.00            | 47.10        | 8.93          | 101.95   | 43.35   | 244.61       | A061A   |
| 2016232       | 07:52 | -55.29     | -31.88      | 10.00            | 47.10        | 8.93          | 107.65   | 27.94   | 203.10       | A061A   |
| 2017105       | 08:39 | -23.27     | -67.72      | 155.00           | 47.10        | 8.93          | 98.15    | 42.18   | 244.67       | A061A   |
| 2015315       | 02:14 | -29.51     | -72.01      | 12.00            | 49.85        | 10.21         | 107.29   | 42.20   | 244.76       | A111A   |
| 2015328       | 23:05 | -10.54     | -70.94      | 606.00           | 49.85        | 10.21         | 92.33    | 39.80   | 256.52       | A111A   |
| 2016113       | 03:23 | -0.29      | -80.50      | 10.00            | 49.85        | 10.21         | 90.68    | 40.34   | 270.36       | A111A   |
| 2016153       | 23:16 | -2.10      | 100.67      | 50.00            | 49.85        | 10.21         | 91.89    | 319.63  | 91.00        | A111A   |
| 2016159       | 11:11 | 18.36      | -105.17     | 10.00            | 49.85        | 10.21         | 91.43    | 35.81   | 300.87       | A111A   |
| 2016159       | 19:35 | 1.28       | 126.37      | 31.00            | 49.85        | 10.21         | 105.57   | 322.90  | 68.68        | A111A   |
| 2016207       | 17:46 | -26.11     | -70.51      | 72.00            | 49.85        | 10.21         | 103.87   | 41.15   | 246.07       | A111A   |
| 2017283       | 06:52 | -18.57     | -69.75      | 85.00            | 49.85        | 10.21         | 97.72    | 40.04   | 250.49       | A111A   |
| 2016207       | 17:46 | -26.11     | -70.51      | 72.00            | 49.65        | 7.91          | 102.43   | 40.70   | 244.42       | A112A   |
| 2017283       | 06:52 | -18.57     | -69.75      | 85.00            | 49.65        | 7.91          | 96.24    | 39.70   | 248.78       | A112A   |
| 2016159       | 11:11 | 18.36      | -105.17     | 10.00            | 49.55        | 8.73          | 90.75    | 36.55   | 299.73       | A113A   |
| 2016159       | 19:35 | 1.28       | 126.37      | 31.00            | 49.55        | 8.73          | 106.57   | 322.98  | 67.53        | A113A   |
| 2016207       | 17:46 | -26.11     | -70.51      | 72.00            | 49.55        | 8.73          | 102.87   | 41.03   | 244.97       | A113A   |
| 2017010       | 06:33 | 4.48       | 122.62      | 627.00           | 49.55        | 8.73          | 101.78   | 322.53  | 68.62        | A113A   |
| 2017223       | 05:48 | 14.01      | 120.74      | 172.00           | 49.55        | 8.73          | 93.12    | 322.79  | 64.32        | A113A   |
| 2017283       | 06:52 | -18.57     | -69.75      | 85.00            | 49.55        | 8.73          | 96.71    | 39.99   | 249.37       | A113A   |
| 2015315       | 02:14 | -29.51     | -72.01      | 12.00            | 49.59        | 9.18          | 106.57   | 42.14   | 243.99       | A114A   |

| DATE (YYYYJJ) | TIME  | Event Lat. | Event Long. | Event depth (km) | Station Lat. | Station Long. | Distance | Azimuth | Back Azimuth | Station |
|---------------|-------|------------|-------------|------------------|--------------|---------------|----------|---------|--------------|---------|
| 2016159       | 11:11 | 18.36      | -105.17     | 10.00            | 49.59        | 9.18          | 90.98    | 36.37   | 300.08       | A114A   |
| 2016159       | 19:35 | 1.28       | 126.37      | 31.00            | 49.59        | 9.18          | 106.29   | 322.91  | 67.89        | A114A   |
| 2017010       | 06:33 | 4.48       | 122.62      | 627.00           | 49.59        | 9.18          | 101.49   | 322.46  | 68.98        | A114A   |
| 2017283       | 06:52 | -18.57     | -69.75      | 85.00            | 49.59        | 9.18          | 97.00    | 40.05   | 249.71       | A114A   |
| 2015315       | 02:14 | -29.51     | -72.01      | 12.00            | 49.27        | 9.05          | 106.36   | 42.40   | 243.82       | A115A   |
| 2016159       | 19:35 | 1.28       | 126.37      | 31.00            | 49.27        | 9.05          | 106.48   | 322.64  | 67.87        | A115A   |
| 2017049       | 12:30 | -23.86     | -66.66      | 222.00           | 49.27        | 9.05          | 98.97    | 39.98   | 243.92       | A115A   |
| 2017049       | 12:30 | -23.86     | -66.66      | 222.00           | 49.40        | 9.48          | 99.28    | 39.99   | 244.25       | A116A   |
| 2017105       | 08:39 | -23.27     | -67.72      | 155.00           | 49.40        | 9.48          | 99.46    | 40.23   | 245.39       | A116A   |
| 2017283       | 06:52 | -18.57     | -69.75      | 85.00            | 49.40        | 9.48          | 97.12    | 40.30   | 249.90       | A116A   |
| 2015315       | 02:14 | -29.51     | -72.01      | 12.00            | 49.04        | 9.57          | 106.56   | 42.77   | 244.11       | A117A   |
| 2015328       | 23:05 | -10.54     | -70.94      | 606.00           | 49.04        | 9.57          | 91.73    | 40.49   | 256.01       | A117A   |
| 2016157       | 16:45 | -4.59      | 125.63      | 429.00           | 49.04        | 9.57          | 110.37   | 320.91  | 72.78        | A117A   |
| 2016201       | 05:38 | -30.25     | -71.97      | 8.00             | 49.04        | 9.57          | 107.08   | 42.91   | 243.56       | A117A   |
| 2016207       | 17:46 | -26.11     | -70.51      | 72.00            | 49.04        | 9.57          | 103.16   | 41.73   | 245.44       | A117A   |
| 2016325       | 21:17 | -31.62     | -68.63      | 108.00           | 49.04        | 9.57          | 106.15   | 42.11   | 240.38       | A117A   |
| 2017010       | 06:33 | 4.48       | 122.62      | 627.00           | 49.04        | 9.57          | 101.45   | 321.85  | 69.39        | A117A   |
| 2017105       | 08:39 | -23.27     | -67.72      | 155.00           | 49.04        | 9.57          | 99.36    | 40.58   | 245.39       | A117A   |
| 2017283       | 06:52 | -18.57     | -69.75      | 85.00            | 49.04        | 9.57          | 97.05    | 40.66   | 249.92       | A117A   |
| 2015315       | 02:14 | -29.51     | -72.01      | 12.00            | 49.35        | 9.97          | 106.93   | 42.60   | 244.46       | A118A   |
| 2015328       | 23:05 | -10.54     | -70.94      | 606.00           | 49.01        | 10.04         | 92.02    | 40.60   | 256.36       | A119A   |
| 2016153       | 23:16 | -2.10      | 100.67      | 50.00            | 49.01        | 10.04         | 91.99    | 318.79  | 90.90        | A119A   |
| 2017243       | 17:26 | -1.16      | 99.69       | 43.00            | 49.01        | 10.04         | 90.64    | 318.81  | 91.02        | A119A   |
| 2018092       | 14:00 | -20.66     | -63.01      | 559.00           | 47.55        | 11.44         | 95.04    | 40.93   | 244.92       | A140A   |
| 2018240       | 07:28 | -10.89     | 124.12      | 14.00            | 47.55        | 11.44         | 113.25   | 317.14  | 80.51        | A140A   |
| 2016139       | 08:17 | 0.43       | -79.79      | 16.00            | 47.75        | 11.85         | 90.79    | 42.42   | 271.50       | A141A   |
| 2016159       | 19:35 | 1.28       | 126.37      | 31.00            | 47.75        | 11.85         | 105.28   | 320.47  | 70.55        | A141A   |
| 2016207       | 17:46 | -26.11     | -70.51      | 72.00            | 47.75        | 11.85         | 104.03   | 43.58   | 246.71       | A141A   |
| 2016217       | 14:35 | -22.33     | -66.01      | 270.00           | 47.75        | 11.85         | 98.48    | 41.84   | 246.23       | A141A   |
| 2016325       | 21:17 | -31.62     | -68.63      | 108.00           | 47.75        | 11.85         | 106.85   | 44.06   | 241.53       | A141A   |
| 2017010       | 06:33 | 4.48       | 122.62      | 627.00           | 47.75        | 11.85         | 100.45   | 320.09  | 71.42        | A141A   |
| 2017283       | 06:52 | -18.57     | -69.75      | 85.00            | 47.75        | 11.85         | 98.05    | 42.39   | 251.40       | A141A   |
| 2018092       | 14:00 | -20.66     | -63.01      | 559.00           | 47.75        | 11.85         | 95.38    | 40.86   | 245.23       | A141A   |
| 2018231       | 15:16 | -8.32      | 116.63      | 21.00            | 47.75        | 11.85         | 106.05   | 317.24  | 84.67        | A141A   |
| 2016139       | 17:06 | 0.49       | -79.62      | 29.00            | 47.68        | 11.00         | 90.06    | 42.50   | 270.79       | A143A   |
| 2016193       | 02:31 | 0.58       | -79.64      | 21.00            | 47.68        | 11.00         | 90.01    | 42.50   | 270.86       | A143A   |
| 2016217       | 14:35 | -22.33     | -66.01      | 270.00           | 47.68        | 11.00         | 97.93    | 41.66   | 245.63       | A143A   |
| 2017049       | 12:30 | -23.86     | -66.66      | 222.00           | 47.68        | 11.00         | 99.46    | 42.00   | 245.06       | A143A   |
| 2017132       | 11:01 | 12.92      | -90.06      | 16.00            | 47.68        | 11.00         | 87.86    | 41.58   | 286.75       | A143A   |
| 2017140       | 01:26 | 9.38       | 123.95      | 533.00           | 47.68        | 11.00         | 98.08    | 321.06  | 66.61        | A143A   |
| 2018092       | 14:00 | -20.66     | -63.01      | 559.00           | 47.68        | 11.00         | 94.84    | 40.68   | 244.62       | A143A   |
| 2018236       | 09:24 | -11.04     | -70.83      | 630.00           | 47.68        | 11.00         | 92.64    | 42.03   | 256.61       | A143A   |
| 2018092       | 14:00 | -20.66     | -63.01      | 559.00           | 48.10        | 12.08         | 95.67    | 40.61   | 245.42       | A144A   |
| 2018229       | 15:55 | -7.37      | 119.80      | 529.00           | 48.10        | 12.08         | 107.27   | 318.03  | 81.66        | A144A   |
| 2018250       | 02:32 | -2.35      | -78.90      | 93.00            | 48.10        | 12.08         | 92.39    | 42.13   | 269.16       | A144A   |



| DATE (YYYYJJ) | TIME  | Event Lat. | Event Long. | Event depth (km) | Station Lat. | Station Long. | Distance | Azimuth | Back Azimuth | Station |
|---------------|-------|------------|-------------|------------------|--------------|---------------|----------|---------|--------------|---------|
| 2016139       | 17:06 | 0.49       | -79.62      | 29.00            | 47.87        | 12.40         | 91.00    | 42.30   | 271.82       | A145A   |
| 2016157       | 16:45 | -4.59      | 125.63      | 429.00           | 47.87        | 12.40         | 108.88   | 319.16  | 75.48        | A145A   |
| 2018092       | 14:00 | -20.66     | -63.01      | 559.00           | 47.87        | 12.40         | 95.77    | 40.91   | 245.62       | A145A   |
| 2018229       | 15:55 | -7.37      | 119.80      | 529.00           | 47.87        | 12.40         | 107.10   | 317.76  | 81.97        | A145A   |
| 2018250       | 02:32 | -2.35      | -78.90      | 93.00            | 47.87        | 12.40         | 92.60    | 42.36   | 269.39       | A145A   |
| 2018271       | 10:22 | -0.18      | 119.84      | 10.00            | 47.87        | 12.40         | 101.78   | 318.99  | 77.04        | A145A   |
| 2016211       | 21:38 | 18.54      | 145.51      | 196.00           | 45.25        | 7.61          | 105.87   | 330.50  | 41.40        | A282A   |
| 2016238       | 17:24 | 30.61      | 137.85      | 456.00           | 45.25        | 7.61          | 91.99    | 327.35  | 41.19        | A282A   |
| 2016329       | 19:03 | 11.91      | -88.90      | 10.00            | 45.25        | 7.61          | 86.17    | 44.70   | 282.94       | A282A   |
| 2015351       | 20:09 | 15.80      | -93.63      | 85.00            | 45.14        | 9.38          | 87.84    | 43.64   | 290.18       | A284A   |
| 2016111       | 08:53 | 0.64       | -80.21      | 14.00            | 45.14        | 9.38          | 89.26    | 45.06   | 270.16       | A284A   |
| 2016159       | 19:35 | 1.28       | 126.37      | 31.00            | 45.14        | 9.38          | 107.78   | 318.52  | 69.33        | A284A   |
| 2016207       | 17:46 | -26.11     | -70.51      | 72.00            | 45.14        | 9.38          | 101.39   | 45.30   | 244.55       | A284A   |
| 2016211       | 21:38 | 18.54      | 145.51      | 196.00           | 45.14        | 9.38          | 105.12   | 329.46  | 42.93        | A284A   |
| 2016238       | 17:24 | 30.61      | 137.85      | 456.00           | 45.14        | 9.38          | 91.24    | 326.34  | 42.47        | A284A   |
| 2016329       | 19:03 | 11.91      | -88.90      | 10.00            | 45.14        | 9.38          | 87.42    | 44.52   | 284.18       | A284A   |
| 2016211       | 21:38 | 18.54      | 145.51      | 196.00           | 45.37        | 8.83          | 105.21   | 329.92  | 42.42        | A286A   |
| 2016217       | 16:44 | 24.94      | 142.01      | 510.00           | 45.37        | 8.83          | 98.08    | 328.72  | 41.96        | A286A   |
| 2018181       | 04:16 | 19.02      | -105.12     | 15.00            | 45.37        | 8.83          | 92.35    | 40.15   | 300.08       | A286A   |
| 2016159       | 11:11 | 18.36      | -105.17     | 10.00            | 45.62        | 8.36          | 92.47    | 40.09   | 299.36       | A287A   |
| 2016211       | 21:38 | 18.54      | 145.51      | 196.00           | 45.62        | 8.36          | 105.25   | 330.35  | 41.97        | A287A   |
| 2016329       | 19:03 | 11.91      | -88.90      | 10.00            | 45.62        | 8.36          | 86.60    | 44.22   | 283.44       | A287A   |
| 2017010       | 06:33 | 4.48       | 122.62      | 627.00           | 45.62        | 8.36          | 103.43   | 318.87  | 69.15        | A287A   |
| 2018181       | 04:16 | 19.02      | -105.12     | 15.00            | 45.62        | 8.36          | 91.93    | 40.09   | 299.75       | A287A   |
| 2018250       | 02:32 | -2.35      | -78.90      | 93.00            | 45.62        | 8.36          | 89.74    | 44.51   | 266.41       | A287A   |
| 2016207       | 17:46 | -26.11     | -70.51      | 72.00            | 46.01        | 8.48          | 101.20   | 44.22   | 244.12       | A288A   |
| 2018240       | 22:55 | 16.80      | 146.84      | 55.00            | 46.01        | 8.48          | 107.03   | 331.03  | 41.73        | A288A   |
| 2015262       | 05:26 | -29.64     | -72.08      | 6.00             | 46.05        | 9.76          | 105.49   | 45.68   | 243.41       | A289A   |
| 2015315       | 02:14 | -29.51     | -72.01      | 12.00            | 46.05        | 9.76          | 105.35   | 45.63   | 243.46       | A289A   |
| 2015351       | 20:09 | 15.80      | -93.63      | 85.00            | 46.05        | 9.76          | 87.77    | 42.69   | 290.41       | A289A   |
| 2016159       | 11:11 | 18.36      | -105.17     | 10.00            | 46.05        | 9.76          | 93.10    | 39.24   | 300.40       | A289A   |
| 2016207       | 17:46 | -26.11     | -70.51      | 72.00            | 46.05        | 9.76          | 102.02   | 44.58   | 244.97       | A289A   |
| 2017105       | 08:39 | -23.27     | -67.72      | 155.00           | 46.05        | 9.76          | 98.22    | 43.39   | 245.10       | A289A   |
| 2017283       | 06:52 | -18.57     | -69.75      | 85.00            | 46.05        | 9.76          | 96.14    | 43.53   | 249.73       | A289A   |
| 2018250       | 02:32 | -2.35      | -78.90      | 93.00            | 46.05        | 9.76          | 90.74    | 44.13   | 267.41       | A289A   |
| 2016113       | 03:23 | -0.29      | -80.50      | 10.00            | 46.51        | 10.90         | 91.18    | 43.68   | 270.82       | A290A   |
| 2016159       | 11:11 | 18.36      | -105.17     | 10.00            | 46.51        | 10.90         | 93.55    | 38.43   | 301.27       | A290A   |
| 2016211       | 21:38 | 18.54      | 145.51      | 196.00           | 46.51        | 10.90         | 103.39   | 329.64  | 43.97        | A290A   |
| 2017105       | 08:39 | -23.27     | -67.72      | 155.00           | 46.51        | 10.90         | 99.14    | 43.30   | 245.94       | A290A   |
| 2017283       | 06:52 | -18.57     | -69.75      | 85.00            | 46.51        | 10.90         | 97.04    | 43.37   | 250.58       | A290A   |
| 2017049       | 12:30 | -23.86     | -66.66      | 222.00           | 45.82        | 13.13         | 100.02   | 44.34   | 246.20       | A300A   |
| 2017105       | 08:39 | -23.27     | -67.72      | 155.00           | 45.82        | 13.13         | 100.28   | 44.56   | 247.33       | A300A   |
| 2017187       | 08:23 | 11.13      | 124.63      | 9.00             | 45.82        | 13.13         | 96.57    | 319.08  | 66.81        | A300A   |
| 2016113       | 03:23 | -0.29      | -80.50      | 10.00            | 45.62        | 12.62         | 92.40    | 44.54   | 272.02       | A301A   |
| 2016364       | 22:50 | -9.03      | 118.66      | 79.00            | 45.31        | 10.66         | 109.02   | 314.78  | 83.55        | A313A   |

| DATE (YYYYJJ) | TIME  | Event Lat. | Event Long. | Event depth (km) | Station Lat. | Station Long. | Distance | Azimuth | Back Azimuth | Station |
|---------------|-------|------------|-------------|------------------|--------------|---------------|----------|---------|--------------|---------|
| 2017052       | 14:29 | -19.28     | -63.90      | 595.00           | 45.31        | 10.66         | 93.16    | 42.94   | 245.77       | A313A   |
| 2017105       | 08:39 | -23.27     | -67.72      | 155.00           | 45.31        | 10.66         | 98.49    | 44.33   | 245.61       | A313A   |
| 2017283       | 06:52 | -18.57     | -69.75      | 85.00            | 45.31        | 10.66         | 96.48    | 44.45   | 250.28       | A313A   |
| 2016207       | 17:46 | -26.11     | -70.51      | 72.00            | 48.73        | 10.30         | 103.47   | 42.23   | 245.88       | A360A   |
| 2016217       | 14:35 | -22.33     | -66.01      | 270.00           | 48.73        | 10.30         | 97.93    | 40.51   | 245.27       | A360A   |
| 2017049       | 12:30 | -23.86     | -66.66      | 222.00           | 48.73        | 10.30         | 99.48    | 40.84   | 244.72       | A360A   |
| 2017196       | 12:32 | 0.41       | 121.98      | 113.00           | 48.73        | 10.30         | 103.85   | 320.68  | 73.14        | A360A   |
| 2017283       | 06:52 | -18.57     | -69.75      | 85.00            | 48.73        | 10.30         | 97.39    | 41.12   | 250.41       | A360A   |
| 2018021       | 01:26 | -18.88     | -69.44      | 116.00           | 48.73        | 10.30         | 97.43    | 41.08   | 249.99       | A360A   |
| 2016207       | 17:46 | -26.11     | -70.51      | 72.00            | 48.52        | 10.93         | 103.77   | 42.60   | 246.27       | A363A   |
| 2016217       | 14:35 | -22.33     | -66.01      | 270.00           | 48.52        | 10.93         | 98.23    | 40.87   | 245.69       | A363A   |
| 2017010       | 06:33 | 4.48       | 122.62      | 627.00           | 48.52        | 10.93         | 100.78   | 321.03  | 70.57        | A363A   |
| 2017052       | 14:29 | -19.28     | -63.90      | 595.00           | 48.52        | 10.93         | 94.64    | 40.07   | 246.16       | A363A   |
| 2017105       | 08:39 | -23.27     | -67.72      | 155.00           | 48.52        | 10.93         | 99.97    | 41.44   | 246.27       | A363A   |
| 2017196       | 12:32 | 0.41       | 121.98      | 113.00           | 48.52        | 10.93         | 103.50   | 320.35  | 73.70        | A363A   |
| 2017010       | 06:33 | 4.48       | 122.62      | 627.00           | 48.50        | 11.45         | 100.46   | 320.90  | 70.98        | A364A   |
| 2017049       | 12:30 | -23.86     | -66.66      | 222.00           | 48.50        | 11.45         | 100.08   | 41.38   | 245.50       | A364A   |
| 2017052       | 14:29 | -19.28     | -63.90      | 595.00           | 48.50        | 11.45         | 94.95    | 40.23   | 246.54       | A364A   |
| 2017105       | 08:39 | -23.27     | -67.72      | 155.00           | 48.50        | 11.45         | 100.28   | 41.60   | 246.63       | A364A   |
| 2017140       | 01:26 | 9.38       | 123.95      | 533.00           | 48.50        | 11.45         | 97.48    | 321.70  | 66.86        | A364A   |
| 2017283       | 06:52 | -18.57     | -69.75      | 85.00            | 48.50        | 11.45         | 98.04    | 41.59   | 251.21       | A364A   |
| 2018021       | 01:26 | -18.88     | -69.44      | 116.00           | 48.50        | 11.45         | 98.08    | 41.55   | 250.79       | A364A   |
| 2016211       | 21:38 | 18.54      | 145.51      | 196.00           | 47.83        | 10.62         | 102.57   | 330.72  | 43.53        | A366A   |
| 2017105       | 08:39 | -23.27     | -67.72      | 155.00           | 47.83        | 10.62         | 99.50    | 41.99   | 245.95       | A366A   |
| 2016159       | 19:35 | 1.28       | 126.37      | 31.00            | 48.31        | 11.92         | 105.05   | 321.00  | 70.47        | A367A   |
| 2017243       | 17:26 | -1.16      | 99.69       | 43.00            | 48.31        | 11.92         | 89.37    | 318.15  | 92.43        | A367A   |
| 2017283       | 06:52 | -18.57     | -69.75      | 85.00            | 48.31        | 11.92         | 98.28    | 41.88   | 251.52       | A367A   |
| 2016207       | 17:46 | -26.11     | -70.51      | 72.00            | 49.13        | 10.55         | 103.78   | 41.92   | 246.14       | A368A   |
| 2017049       | 12:30 | -23.86     | -66.66      | 222.00           | 49.13        | 10.55         | 99.79    | 40.55   | 244.96       | A368A   |
| 2018021       | 01:26 | -18.88     | -69.44      | 116.00           | 49.13        | 10.55         | 97.72    | 40.75   | 250.21       | A368A   |
| 2016157       | 16:45 | -4.59      | 125.63      | 429.00           | 49.12        | 11.02         | 109.43   | 320.70  | 73.95        | A369A   |
| 2016159       | 19:35 | 1.28       | 126.37      | 31.00            | 49.12        | 11.02         | 105.34   | 322.00  | 69.53        | A369A   |
| 2016207       | 17:46 | -26.11     | -70.51      | 72.00            | 49.12        | 11.02         | 104.06   | 42.06   | 246.46       | A369A   |
| 2016217       | 14:35 | -22.33     | -66.01      | 270.00           | 49.12        | 11.02         | 98.53    | 40.35   | 245.83       | A369A   |
| 2016325       | 21:17 | -31.62     | -68.63      | 108.00           | 49.12        | 11.02         | 107.01   | 42.53   | 241.36       | A369A   |
| 2017010       | 06:33 | 4.48       | 122.62      | 627.00           | 49.12        | 11.02         | 100.52   | 321.58  | 70.53        | A369A   |
| 2017052       | 14:29 | -19.28     | -63.90      | 595.00           | 49.12        | 11.02         | 94.93    | 39.55   | 246.27       | A369A   |
| 2017196       | 12:32 | 0.41       | 121.98      | 113.00           | 49.12        | 11.02         | 103.28   | 320.92  | 73.63        | A369A   |
| 2017283       | 06:52 | -18.57     | -69.75      | 85.00            | 49.12        | 11.02         | 97.97    | 40.91   | 250.99       | A369A   |
| 2015262       | 13:12 | -32.33     | -72.06      | 18.00            | 46.73        | 11.32         | 108.61   | 46.14   | 242.54       | ABSI    |
| 2016159       | 11:11 | 18.36      | -105.17     | 10.00            | 47.59        | 8.25          | 91.44    | 38.41   | 299.34       | ACB     |
| 2016201       | 05:38 | -30.25     | -71.97      | 8.00             | 47.59        | 8.25          | 105.63   | 43.85   | 242.31       | ACB     |
| 2016207       | 17:46 | -26.11     | -70.51      | 72.00            | 47.59        | 8.25          | 101.75   | 42.70   | 244.26       | ACB     |
| 2016211       | 21:38 | 18.54      | 145.51      | 196.00           | 47.59        | 8.25          | 103.83   | 331.76  | 41.54        | ACB     |
| 2016217       | 14:35 | -22.33     | -66.01      | 270.00           | 47.59        | 8.25          | 96.20    | 40.95   | 243.70       | ACB     |

| DATE (YYYYJJ) | TIME  | Event Lat. | Event Long. | Event depth (km) | Station Lat. | Station Long. | Distance | Azimuth | Back Azimuth | Station |
|---------------|-------|------------|-------------|------------------|--------------|---------------|----------|---------|--------------|---------|
| 2016217       | 16:44 | 24.94      | 142.01      | 510.00           | 47.59        | 8.25          | 96.68    | 330.51  | 41.32        | ACB     |
| 2016238       | 17:24 | 30.61      | 137.85      | 456.00           | 47.59        | 8.25          | 89.95    | 328.56  | 41.63        | ACB     |
| 2017105       | 08:39 | -23.27     | -67.72      | 155.00           | 47.59        | 8.25          | 97.95    | 41.54   | 244.27       | ACB     |
| 2017283       | 06:52 | -18.57     | -69.75      | 85.00            | 47.59        | 8.25          | 95.71    | 41.72   | 248.83       | ACB     |
| 2018021       | 01:26 | -18.88     | -69.44      | 116.00           | 47.59        | 8.25          | 95.75    | 41.66   | 248.40       | ACB     |
| 2018092       | 14:00 | -20.66     | -63.01      | 559.00           | 47.59        | 8.25          | 93.13    | 39.94   | 242.64       | ACB     |
| 2018250       | 02:32 | -2.35      | -78.90      | 93.00            | 47.59        | 8.25          | 89.79    | 42.54   | 266.33       | ACB     |
| 2015161       | 14:12 | -22.40     | -68.43      | 124.00           | 47.87        | 8.18          | 97.81    | 41.38   | 245.33       | BERGE   |
| 2015232       | 11:20 | 0.49       | 126.59      | 46.00            | 47.87        | 8.18          | 108.30   | 321.41  | 67.88        | BERGE   |
| 2015261       | 09:30 | -32.37     | -72.23      | 8.00             | 47.87        | 8.18          | 107.40   | 44.08   | 240.97       | BERGE   |
| 2015262       | 05:26 | -29.64     | -72.08      | 6.00             | 47.87        | 8.18          | 105.35   | 43.48   | 242.84       | BERGE   |
| 2016159       | 11:11 | 18.36      | -105.17     | 10.00            | 47.87        | 8.18          | 91.26    | 38.19   | 299.29       | BERGE   |
| 2016201       | 05:38 | -30.25     | -71.97      | 8.00             | 47.87        | 8.18          | 105.72   | 43.56   | 242.33       | BERGE   |
| 2016207       | 17:46 | -26.11     | -70.51      | 72.00            | 47.87        | 8.18          | 101.82   | 42.42   | 244.26       | BERGE   |
| 2017010       | 06:33 | 4.48       | 122.62      | 627.00           | 47.87        | 8.18          | 102.73   | 321.07  | 68.51        | BERGE   |
| 2017105       | 08:39 | -23.27     | -67.72      | 155.00           | 47.87        | 8.18          | 98.02    | 41.26   | 244.25       | BERGE   |
| 2017223       | 05:48 | 14.01      | 120.74      | 172.00           | 47.87        | 8.18          | 94.18    | 321.44  | 63.99        | BERGE   |
| 2017283       | 06:52 | -18.57     | -69.75      | 85.00            | 47.87        | 8.18          | 95.77    | 41.43   | 248.80       | BERGE   |
| 2018092       | 14:00 | -20.66     | -63.01      | 559.00           | 47.87        | 8.18          | 93.21    | 39.67   | 242.60       | BERGE   |
| 2018100       | 10:39 | -31.03     | -71.53      | 66.00            | 47.87        | 8.18          | 106.02   | 43.57   | 241.49       | BERGE   |
| 2018236       | 09:24 | -11.04     | -70.83      | 630.00           | 47.87        | 8.18          | 90.84    | 41.38   | 254.54       | BERGE   |
| 2015161       | 14:12 | -22.40     | -68.43      | 124.00           | 48.33        | 8.33          | 98.09    | 41.00   | 245.49       | BFO     |
| 2015171       | 02:30 | -36.36     | -73.81      | 11.00            | 48.33        | 8.33          | 111.47   | 45.26   | 239.23       | BFO     |
| 2015262       | 05:26 | -29.64     | -72.08      | 6.00             | 48.33        | 8.33          | 105.65   | 43.10   | 243.05       | BFO     |
| 2015262       | 13:12 | -32.33     | -72.06      | 18.00            | 48.33        | 8.33          | 107.58   | 43.65   | 241.12       | BFO     |
| 2016159       | 11:11 | 18.36      | -105.17     | 10.00            | 48.33        | 8.33          | 91.12    | 37.74   | 299.41       | BFO     |
| 2016201       | 05:38 | -30.25     | -71.97      | 8.00             | 48.33        | 8.33          | 106.02   | 43.19   | 242.55       | BFO     |
| 2016217       | 14:35 | -22.33     | -66.01      | 270.00           | 48.33        | 8.33          | 96.58    | 40.30   | 243.82       | BFO     |
| 2016217       | 16:44 | 24.94      | 142.01      | 510.00           | 48.33        | 8.33          | 96.09    | 330.96  | 41.32        | BFO     |
| 2017049       | 12:30 | -23.86     | -66.66      | 222.00           | 48.33        | 8.33          | 98.13    | 40.62   | 243.29       | BFO     |
| 2017105       | 08:39 | -23.27     | -67.72      | 155.00           | 48.33        | 8.33          | 98.32    | 40.88   | 244.42       | BFO     |
| 2017283       | 06:52 | -18.57     | -69.75      | 85.00            | 48.33        | 8.33          | 96.03    | 41.04   | 248.95       | BFO     |
| 2018092       | 14:00 | -20.66     | -63.01      | 559.00           | 48.33        | 8.33          | 93.51    | 39.30   | 242.74       | BFO     |
| 2018250       | 02:32 | -2.35      | -78.90      | 93.00            | 48.33        | 8.33          | 89.89    | 41.80   | 266.38       | BFO     |
| 2018240       | 22:55 | 16.80      | 146.84      | 55.00            | 46.87        | 8.43          | 106.41   | 331.66  | 41.51        | BNALP   |
| 2016159       | 11:11 | 18.36      | -105.17     | 10.00            | 46.50        | 11.32         | 93.80    | 38.29   | 301.58       | BOSI    |
| 2016207       | 17:46 | -26.11     | -70.51      | 72.00            | 46.50        | 11.32         | 103.19   | 44.62   | 246.08       | BOSI    |
| 2016211       | 21:38 | 18.54      | 145.51      | 196.00           | 46.50        | 11.32         | 103.20   | 329.42  | 44.32        | BOSI    |
| 2016217       | 16:44 | 24.94      | 142.01      | 510.00           | 46.50        | 11.32         | 96.07    | 328.21  | 43.81        | BOSI    |
| 2016238       | 17:24 | 30.61      | 137.85      | 456.00           | 46.50        | 11.32         | 89.33    | 326.28  | 43.85        | BOSI    |
| 2016329       | 19:03 | 11.91      | -88.90      | 10.00            | 46.50        | 11.32         | 88.38    | 42.86   | 285.50       | BOSI    |
| 2017010       | 06:33 | 4.48       | 122.62      | 627.00           | 46.48        | 10.37         | 101.82   | 319.20  | 70.52        | BRMO    |
| 2017132       | 11:01 | 12.92      | -90.06      | 16.00            | 46.48        | 10.37         | 87.79    | 42.86   | 286.34       | BRMO    |
| 2018021       | 01:26 | -18.88     | -69.44      | 116.00           | 46.48        | 10.37         | 96.70    | 43.23   | 249.78       | BRMO    |
| 2016207       | 17:46 | -26.11     | -70.51      | 72.00            | 47.23        | 8.01          | 101.44   | 42.95   | 244.03       | DAGMA   |

| DATE (YYYYJJ) | TIME  | Event Lat. | Event Long. | Event depth (km) | Station Lat. | Station Long. | Distance | Azimuth | Back Azimuth | Station |
|---------------|-------|------------|-------------|------------------|--------------|---------------|----------|---------|--------------|---------|
| 2017105       | 08:39 | -23.27     | -67.72      | 155.00           | 47.23        | 8.01          | 97.64    | 41.79   | 244.06       | DAGMA   |
| 2018250       | 02:32 | -2.35      | -78.90      | 93.00            | 47.90        | 8.85          | 90.21    | 42.26   | 266.76       | EMING   |
| 2015161       | 14:12 | -22.40     | -68.43      | 124.00           | 47.44        | 8.01          | 97.52    | 41.73   | 245.16       | EMMET   |
| 2016207       | 17:46 | -26.11     | -70.51      | 72.00            | 47.44        | 8.01          | 101.53   | 42.77   | 244.07       | EMMET   |
| 2016217       | 14:35 | -22.33     | -66.01      | 270.00           | 47.44        | 8.01          | 95.99    | 41.01   | 243.51       | EMMET   |
| 2017283       | 06:52 | -18.57     | -69.75      | 85.00            | 47.44        | 8.01          | 95.51    | 41.80   | 248.64       | EMMET   |
| 2018092       | 14:00 | -20.66     | -63.01      | 559.00           | 47.44        | 8.01          | 92.91    | 40.00   | 242.46       | EMMET   |
| 2018236       | 09:24 | -11.04     | -70.83      | 630.00           | 47.44        | 8.01          | 90.62    | 41.76   | 254.42       | EMMET   |
| 2018250       | 02:32 | -2.35      | -78.90      | 93.00            | 47.44        | 8.01          | 89.62    | 42.68   | 266.15       | EMMET   |
| 2016159       | 11:11 | 18.36      | -105.17     | 10.00            | 46.44        | 8.11          | 91.92    | 39.47   | 299.20       | FIESA   |
| 2016211       | 21:38 | 18.54      | 145.51      | 196.00           | 46.44        | 8.11          | 104.76   | 331.05  | 41.61        | FIESA   |
| 2015351       | 20:09 | 15.80      | -93.63      | 85.00            | 46.62        | 10.26         | 87.90    | 42.03   | 290.75       | FUORN   |
| 2016159       | 11:11 | 18.36      | -105.17     | 10.00            | 46.62        | 10.26         | 93.11    | 38.56   | 300.80       | FUORN   |
| 2016159       | 19:35 | 1.28       | 126.37      | 31.00            | 46.62        | 10.26         | 106.69   | 319.75  | 69.59        | FUORN   |
| 2016207       | 17:46 | -26.11     | -70.51      | 72.00            | 46.62        | 10.26         | 102.58   | 44.19   | 245.41       | FUORN   |
| 2016211       | 21:38 | 18.54      | 145.51      | 196.00           | 46.62        | 10.26         | 103.62   | 330.05  | 43.42        | FUORN   |
| 2016217       | 14:35 | -22.33     | -66.01      | 270.00           | 46.62        | 10.26         | 97.02    | 42.43   | 244.99       | FUORN   |
| 2017105       | 08:39 | -23.27     | -67.72      | 155.00           | 46.62        | 10.26         | 98.78    | 43.01   | 245.52       | FUORN   |
| 2015271       | 15:48 | -23.80     | -66.61      | 219.00           | 49.69        | 11.22         | 100.36   | 40.19   | 245.53       | GRA1    |
| 2016153       | 23:16 | -2.10      | 100.67      | 50.00            | 49.69        | 11.22         | 91.23    | 319.49  | 91.77        | GRA1    |
| 2018250       | 02:32 | -2.35      | -78.90      | 93.00            | 49.69        | 11.22         | 91.85    | 40.52   | 268.58       | GRA1    |
| 2018271       | 10:22 | -0.18      | 119.84      | 10.00            | 49.69        | 11.22         | 102.11   | 320.99  | 75.75        | GRA1    |
| 2015135       | 20:46 | -2.54      | 102.22      | 151.00           | 49.66        | 11.36         | 92.48    | 319.42  | 90.99        | GRA2    |
| 2015351       | 20:09 | 15.80      | -93.63      | 85.00            | 49.66        | 11.36         | 87.49    | 38.93   | 291.44       | GRA2    |
| 2016153       | 23:16 | -2.10      | 100.67      | 50.00            | 49.66        | 11.36         | 91.14    | 319.46  | 91.88        | GRA2    |
| 2016293       | 00:46 | -4.86      | 108.16      | 614.00           | 49.66        | 11.36         | 98.09    | 319.32  | 87.98        | GRA2    |
| 2017196       | 12:32 | 0.41       | 121.98      | 113.00           | 49.66        | 11.36         | 102.91   | 321.39  | 73.78        | GRA2    |
| 2017243       | 17:26 | -1.16      | 99.69       | 43.00            | 49.66        | 11.36         | 89.79    | 319.49  | 92.02        | GRA2    |
| 2017283       | 06:52 | -18.57     | -69.75      | 85.00            | 49.66        | 11.36         | 98.35    | 40.47   | 251.30       | GRA2    |
| 2018209       | 23:07 | -8.24      | 116.51      | 14.00            | 49.66        | 11.36         | 106.04   | 319.25  | 83.78        | GRA2    |
| 2018236       | 09:24 | -11.04     | -70.83      | 630.00           | 49.66        | 11.36         | 93.32    | 40.16   | 256.97       | GRA2    |
| 2018250       | 02:32 | -2.35      | -78.90      | 93.00            | 49.66        | 11.36         | 91.94    | 40.56   | 268.68       | GRA2    |
| 2018271       | 10:22 | -0.18      | 119.84      | 10.00            | 49.66        | 11.36         | 102.03   | 320.93  | 75.86        | GRA2    |
| 2015135       | 20:46 | -2.54      | 102.22      | 151.00           | 49.76        | 11.32         | 92.50    | 319.53  | 90.95        | GRA3    |
| 2015232       | 11:20 | 0.49       | 126.59      | 46.00            | 49.76        | 11.32         | 105.69   | 322.47  | 69.92        | GRA3    |
| 2015351       | 20:09 | 15.80      | -93.63      | 85.00            | 49.76        | 11.32         | 87.42    | 38.84   | 291.40       | GRA3    |
| 2016153       | 23:16 | -2.10      | 100.67      | 50.00            | 49.76        | 11.32         | 91.17    | 319.57  | 91.85        | GRA3    |
| 2016217       | 16:44 | 24.94      | 142.01      | 510.00           | 49.76        | 11.32         | 93.70    | 330.48  | 43.61        | GRA3    |
| 2016329       | 19:03 | 11.91      | -88.90      | 10.00            | 49.76        | 11.32         | 87.51    | 39.70   | 285.39       | GRA3    |
| 2017181       | 22:49 | -0.28      | -80.49      | 13.00            | 49.76        | 11.32         | 91.38    | 40.42   | 271.20       | GRA3    |
| 2017349       | 17:07 | -7.49      | 108.17      | 90.00            | 49.76        | 11.32         | 100.10   | 319.16  | 89.65        | GRA3    |
| 2018229       | 15:55 | -7.37      | 119.80      | 529.00           | 49.76        | 11.32         | 107.51   | 319.84  | 80.54        | GRA3    |
| 2018250       | 02:32 | -2.35      | -78.90      | 93.00            | 49.76        | 11.32         | 91.92    | 40.45   | 268.65       | GRA3    |
| 2016159       | 11:11 | 18.36      | -105.17     | 10.00            | 49.57        | 11.44         | 92.25    | 35.63   | 301.81       | GRA4    |
| 2017010       | 06:33 | 4.48       | 122.62      | 627.00           | 49.57        | 11.44         | 100.12   | 321.92  | 70.79        | GRA4    |

| DATE (YYYYJJ) | TIME  | Event Lat. | Event Long. | Event depth (km) | Station Lat. | Station Long. | Distance | Azimuth | Back Azimuth | Station |
|---------------|-------|------------|-------------|------------------|--------------|---------------|----------|---------|--------------|---------|
| 2018229       | 15:55 | -7.37      | 119.80      | 529.00           | 49.57        | 11.44         | 107.47   | 319.62  | 80.70        | GRA4    |
| 2018231       | 04:30 | -8.34      | 116.60      | 16.00            | 49.57        | 11.44         | 106.14   | 319.14  | 83.87        | GRA4    |
| 2018250       | 02:32 | -2.35      | -78.90      | 93.00            | 49.57        | 11.44         | 91.99    | 40.65   | 268.73       | GRA4    |
| 2018271       | 10:22 | -0.18      | 119.84      | 10.00            | 49.57        | 11.44         | 102.00   | 320.83  | 75.94        | GRA4    |
| 2015150       | 11:43 | 27.84      | 140.49      | 664.00           | 46.58        | 8.32          | 94.23    | 329.16  | 41.16        | GRIMS   |
| 2015315       | 02:14 | -29.51     | -72.01      | 12.00            | 46.58        | 8.32          | 104.70   | 44.67   | 242.67       | GRIMS   |
| 2016211       | 21:38 | 18.54      | 145.51      | 196.00           | 46.58        | 8.32          | 104.55   | 331.03  | 41.77        | GRIMS   |
| 2015351       | 20:09 | 15.80      | -93.63      | 85.00            | 46.46        | 11.38         | 88.67    | 41.90   | 291.55       | KOSI    |
| 2016159       | 11:11 | 18.36      | -105.17     | 10.00            | 46.46        | 11.38         | 93.85    | 38.30   | 301.62       | KOSI    |
| 2016207       | 17:46 | -26.11     | -70.51      | 72.00            | 46.46        | 11.38         | 103.21   | 44.66   | 246.11       | KOSI    |
| 2016211       | 21:38 | 18.54      | 145.51      | 196.00           | 46.46        | 11.38         | 103.20   | 329.36  | 44.38        | KOSI    |
| 2016217       | 14:35 | -22.33     | -66.01      | 270.00           | 46.46        | 11.38         | 97.66    | 42.89   | 245.74       | KOSI    |
| 2016238       | 17:24 | 30.61      | 137.85      | 456.00           | 46.46        | 11.38         | 89.32    | 326.23  | 43.90        | KOSI    |
| 2015351       | 20:09 | 15.80      | -93.63      | 85.00            | 46.37        | 7.64          | 86.28    | 42.88   | 288.90       | LKBD2   |
| 2016159       | 11:11 | 18.36      | -105.17     | 10.00            | 46.37        | 7.64          | 91.67    | 39.68   | 298.86       | LKBD2   |
| 2016211       | 21:38 | 18.54      | 145.51      | 196.00           | 46.37        | 7.64          | 105.02   | 331.26  | 41.22        | LKBD2   |
| 2016217       | 16:44 | 24.94      | 142.01      | 510.00           | 46.37        | 7.64          | 97.87    | 330.02  | 40.93        | LKBD2   |
| 2016329       | 19:03 | 11.91      | -88.90      | 10.00            | 46.37        | 7.64          | 85.94    | 43.60   | 282.89       | LKBD2   |
| 2017165       | 07:49 | 14.91      | -92.01      | 93.00            | 46.37        | 7.64          | 85.86    | 43.18   | 287.14       | LKBD2   |
| 2017173       | 12:51 | 13.72      | -90.97      | 38.00            | 46.37        | 7.64          | 86.03    | 43.33   | 285.60       | LKBD2   |
| 2015161       | 14:12 | -22.40     | -68.43      | 124.00           | 45.96        | 10.94         | 98.77    | 43.93   | 246.97       | LUSI    |
| 2015184       | 07:03 | 10.17      | 125.89      | 32.00            | 45.96        | 10.94         | 99.44    | 320.12  | 64.81        | LUSI    |
| 2016207       | 17:46 | -26.11     | -70.51      | 72.00            | 45.96        | 10.94         | 102.73   | 45.01   | 245.72       | LUSI    |
| 2016217       | 14:35 | -22.33     | -66.01      | 270.00           | 45.96        | 10.94         | 97.17    | 43.23   | 245.38       | LUSI    |
| 2017049       | 12:30 | -23.86     | -66.66      | 222.00           | 45.96        | 10.94         | 98.69    | 43.57   | 244.77       | LUSI    |
| 2017052       | 14:29 | -19.28     | -63.90      | 595.00           | 45.96        | 10.94         | 93.61    | 42.43   | 246.00       | LUSI    |
| 2017105       | 08:39 | -23.27     | -67.72      | 155.00           | 45.96        | 10.94         | 98.94    | 43.82   | 245.89       | LUSI    |
| 2018092       | 14:00 | -20.66     | -63.01      | 559.00           | 45.96        | 10.94         | 94.06    | 42.23   | 244.45       | LUSI    |
| 2018236       | 09:24 | -11.04     | -70.83      | 630.00           | 45.96        | 10.94         | 92.20    | 43.70   | 256.49       | LUSI    |
| 2015161       | 14:12 | -22.40     | -68.43      | 124.00           | 45.77        | 9.72          | 97.91    | 43.76   | 246.12       | MDI     |
| 2015315       | 02:14 | -29.51     | -72.01      | 12.00            | 45.77        | 9.72          | 105.20   | 45.87   | 243.37       | MDI     |
| 2016139       | 08:17 | 0.43       | -79.79      | 16.00            | 45.77        | 9.72          | 89.35    | 44.42   | 269.95       | MDI     |
| 2016159       | 11:11 | 18.36      | -105.17     | 10.00            | 45.77        | 9.72          | 93.22    | 39.49   | 300.36       | MDI     |
| 2016211       | 21:38 | 18.54      | 145.51      | 196.00           | 45.77        | 9.72          | 104.50   | 329.73  | 43.10        | MDI     |
| 2016217       | 14:35 | -22.33     | -66.01      | 270.00           | 45.77        | 9.72          | 96.32    | 43.04   | 244.53       | MDI     |
| 2016329       | 19:03 | 11.91      | -88.90      | 10.00            | 45.77        | 9.72          | 87.49    | 43.85   | 284.39       | MDI     |
| 2017262       | 18:34 | 18.55      | -98.49      | 48.00            | 45.77        | 9.72          | 88.95    | 41.68   | 295.66       | MDI     |
| 2018200       | 13:51 | 17.93      | -97.72      | 48.00            | 45.77        | 9.72          | 88.92    | 41.91   | 294.71       | MDI     |
| 2015171       | 02:30 | -36.36     | -73.81      | 11.00            | 47.71        | 8.25          | 111.10   | 45.80   | 238.98       | METMA   |
| 2015232       | 11:20 | 0.49       | 126.59      | 46.00            | 47.71        | 8.25          | 108.32   | 321.24  | 67.99        | METMA   |
| 2015261       | 09:30 | -32.37     | -72.23      | 8.00             | 47.71        | 8.25          | 107.37   | 44.25   | 240.98       | METMA   |
| 2015315       | 02:14 | -29.51     | -72.01      | 12.00            | 47.71        | 8.25          | 105.18   | 43.60   | 242.90       | METMA   |
| 2015328       | 23:10 | -10.06     | -71.02      | 620.00           | 47.71        | 8.25          | 90.24    | 41.57   | 255.38       | METMA   |
| 2016159       | 11:11 | 18.36      | -105.17     | 10.00            | 47.71        | 8.25          | 91.38    | 38.31   | 299.34       | METMA   |
| 2016207       | 17:46 | -26.11     | -70.51      | 72.00            | 47.71        | 8.25          | 101.80   | 42.58   | 244.28       | METMA   |

| DATE (YYYYJJ) | TIME  | Event Lat. | Event Long. | Event depth (km) | Station Lat. | Station Long. | Distance | Azimuth | Back Azimuth | Station |
|---------------|-------|------------|-------------|------------------|--------------|---------------|----------|---------|--------------|---------|
| 2017049       | 12:30 | -23.86     | -66.66      | 222.00           | 47.71        | 8.25          | 97.80    | 41.16   | 243.16       | METMA   |
| 2017105       | 08:39 | -23.27     | -67.72      | 155.00           | 47.71        | 8.25          | 98.00    | 41.42   | 244.28       | METMA   |
| 2017283       | 06:52 | -18.57     | -69.75      | 85.00            | 47.71        | 8.25          | 95.76    | 41.60   | 248.84       | METMA   |
| 2018092       | 14:00 | -20.66     | -63.01      | 559.00           | 47.71        | 8.25          | 93.18    | 39.83   | 242.65       | METMA   |
| 2018236       | 09:24 | -11.04     | -70.83      | 630.00           | 47.71        | 8.25          | 90.85    | 41.54   | 254.59       | METMA   |
| 2018250       | 02:32 | -2.35      | -78.90      | 93.00            | 47.71        | 8.25          | 89.80    | 42.42   | 266.32       | METMA   |
| 2016329       | 19:03 | 11.91      | -88.90      | 10.00            | 49.83        | 9.29          | 86.22    | 39.97   | 283.86       | MILB    |
| 2017010       | 06:33 | 4.48       | 122.62      | 627.00           | 49.83        | 9.29          | 101.34   | 322.66  | 69.02        | MILB    |
| 2017283       | 06:52 | -18.57     | -69.75      | 85.00            | 49.83        | 9.29          | 97.15    | 39.85   | 249.81       | MILB    |
| 2015161       | 14:12 | -22.40     | -68.43      | 124.00           | 46.62        | 10.55         | 98.77    | 43.21   | 246.80       | MOSI    |
| 2016159       | 11:11 | 18.36      | -105.17     | 10.00            | 46.62        | 10.55         | 93.28    | 38.47   | 301.01       | MOSI    |
| 2016207       | 17:46 | -26.11     | -70.51      | 72.00            | 46.62        | 10.55         | 102.76   | 44.28   | 245.60       | MOSI    |
| 2016217       | 14:35 | -22.33     | -66.01      | 270.00           | 46.62        | 10.55         | 97.20    | 42.51   | 245.19       | MOSI    |
| 2017010       | 06:33 | 4.48       | 122.62      | 627.00           | 46.62        | 10.55         | 101.65   | 319.29  | 70.63        | MOSI    |
| 2017196       | 12:32 | 0.41       | 121.98      | 113.00           | 46.62        | 10.55         | 104.28   | 318.54  | 73.85        | MOSI    |
| 2017283       | 06:52 | -18.57     | -69.75      | 85.00            | 46.62        | 10.55         | 96.84    | 43.18   | 250.34       | MOSI    |
| 2018092       | 14:00 | -20.66     | -63.01      | 559.00           | 46.62        | 10.55         | 94.10    | 41.52   | 244.22       | MOSI    |
| 2018236       | 09:24 | -11.04     | -70.83      | 630.00           | 46.62        | 10.55         | 92.09    | 43.00   | 256.24       | MOSI    |
| 2018240       | 22:55 | 16.80      | 146.84      | 55.00            | 46.62        | 10.55         | 105.61   | 330.36  | 43.41        | MOSI    |
| 2018250       | 02:32 | -2.35      | -78.90      | 93.00            | 46.62        | 10.55         | 91.31    | 43.59   | 267.99       | MOSI    |
| 2015264       | 18:00 | -31.73     | -71.38      | 35.00            | 47.38        | 7.17          | 105.60   | 43.75   | 240.12       | MTI02   |
| 2016207       | 17:46 | -26.11     | -70.51      | 72.00            | 47.38        | 7.17          | 100.99   | 42.56   | 243.48       | MTI02   |
| 2016217       | 14:35 | -22.33     | -66.01      | 270.00           | 47.38        | 7.17          | 95.45    | 40.80   | 242.91       | MTI02   |
| 2016232       | 07:52 | -55.29     | -31.88      | 10.00            | 47.38        | 7.17          | 107.45   | 26.66   | 202.19       | MTI02   |
| 2017283       | 06:52 | -18.57     | -69.75      | 85.00            | 47.38        | 7.17          | 94.95    | 41.64   | 248.03       | MTI02   |
| 2018092       | 14:00 | -20.66     | -63.01      | 559.00           | 47.38        | 7.17          | 92.38    | 39.78   | 241.85       | MTI02   |
| 2018236       | 09:24 | -11.04     | -70.83      | 630.00           | 47.38        | 7.17          | 90.05    | 41.66   | 253.79       | MTI02   |
| 2018250       | 02:32 | -2.35      | -78.90      | 93.00            | 47.38        | 7.17          | 89.04    | 42.69   | 265.53       | MTI02   |
| 2015150       | 11:43 | 27.84      | 140.49      | 664.00           | 46.60        | 8.75          | 94.02    | 328.95  | 41.48        | NALPS   |
| 2016207       | 17:46 | -26.11     | -70.51      | 72.00            | 46.60        | 8.75          | 101.62   | 43.76   | 244.40       | NALPS   |
| 2016211       | 21:38 | 18.54      | 145.51      | 196.00           | 46.60        | 8.75          | 104.34   | 330.82  | 42.13        | NALPS   |
| 2016217       | 14:35 | -22.33     | -66.01      | 270.00           | 46.60        | 8.75          | 96.07    | 42.00   | 243.94       | NALPS   |
| 2016217       | 16:44 | 24.94      | 142.01      | 510.00           | 46.60        | 8.75          | 97.20    | 329.59  | 41.79        | NALPS   |
| 2017049       | 12:30 | -23.86     | -66.66      | 222.00           | 46.60        | 8.75          | 97.60    | 42.32   | 243.36       | NALPS   |
| 2017105       | 08:39 | -23.27     | -67.72      | 155.00           | 46.60        | 8.75          | 97.82    | 42.59   | 244.49       | NALPS   |
| 2016139       | 08:17 | 0.43       | -79.79      | 16.00            | 45.31        | 11.17         | 90.38    | 44.88   | 270.98       | OPPE    |
| 2016159       | 11:11 | 18.36      | -105.17     | 10.00            | 45.31        | 11.17         | 94.33    | 39.36   | 301.40       | OPPE    |
| 2016238       | 17:24 | 30.61      | 137.85      | 456.00           | 45.31        | 11.17         | 90.25    | 325.53  | 43.75        | OPPE    |
| 2015161       | 14:12 | -22.40     | -68.43      | 124.00           | 46.83        | 9.11          | 97.95    | 42.61   | 245.84       | PANIX   |
| 2015174       | 12:38 | 27.74      | 139.73      | 460.00           | 46.83        | 9.11          | 93.42    | 328.52  | 42.38        | PANIX   |
| 2015262       | 05:26 | -29.64     | -72.08      | 6.00             | 46.83        | 9.11          | 105.44   | 44.75   | 243.19       | PANIX   |
| 2015271       | 15:48 | -23.80     | -66.61      | 219.00           | 46.83        | 9.11          | 97.85    | 42.20   | 243.64       | PANIX   |
| 2016159       | 11:11 | 18.36      | -105.17     | 10.00            | 46.83        | 9.11          | 92.33    | 38.79   | 299.95       | PANIX   |
| 2016207       | 17:46 | -26.11     | -70.51      | 72.00            | 46.83        | 9.11          | 101.95   | 43.66   | 244.69       | PANIX   |
| 2016211       | 21:38 | 18.54      | 145.51      | 196.00           | 46.83        | 9.11          | 104.00   | 330.79  | 42.40        | PANIX   |

| DATE (YYYYJJJ) | TIME  | Event Lat. | Event Long. | Event depth (km) | Station Lat. | Station Long. | Distance | Azimuth | Back Azimuth | Station |
|----------------|-------|------------|-------------|------------------|--------------|---------------|----------|---------|--------------|---------|
| 2016217        | 16:44 | 24.94      | 142.01      | 510.00           | 46.83        | 9.11          | 96.86    | 329.56  | 42.05        | PANIX   |
| 2017049        | 12:30 | -23.86     | -66.66      | 222.00           | 46.83        | 9.11          | 97.93    | 42.22   | 243.64       | PANIX   |
| 2017283        | 06:52 | -18.57     | -69.75      | 85.00            | 46.83        | 9.11          | 95.99    | 42.64   | 249.36       | PANIX   |
| 2018092        | 14:00 | -20.66     | -63.01      | 559.00           | 46.83        | 9.11          | 93.30    | 40.89   | 243.22       | PANIX   |
| 2015262        | 05:26 | -29.64     | -72.08      | 6.00             | 46.93        | 11.41         | 106.90   | 45.37   | 244.69       | ROSI    |
| 2016207        | 17:46 | -26.11     | -70.51      | 72.00            | 46.93        | 11.41         | 103.42   | 44.24   | 246.23       | ROSI    |
| 2017283        | 06:52 | -18.57     | -69.75      | 85.00            | 46.93        | 11.41         | 97.51    | 43.08   | 250.98       | ROSI    |
| 2016207        | 17:46 | -26.11     | -70.51      | 72.00            | 47.30        | 7.09          | 100.91   | 42.60   | 243.42       | SAIRA   |
| 2018250        | 02:32 | -2.35      | -78.90      | 93.00            | 47.30        | 7.09          | 88.98    | 42.77   | 265.47       | SAIRA   |
| 2015259        | 08:00 | 1.88       | 126.43      | 41.00            | 45.62        | 10.52         | 106.45   | 318.83  | 69.62        | SALO    |
| 2016139        | 08:17 | 0.43       | -79.79      | 16.00            | 45.62        | 10.52         | 89.92    | 44.57   | 270.52       | SALO    |
| 2016207        | 17:46 | -26.11     | -70.51      | 72.00            | 45.62        | 10.52         | 102.33   | 45.20   | 245.38       | SALO    |
| 2017181        | 22:49 | -0.28      | -80.49      | 13.00            | 45.62        | 10.52         | 90.91    | 44.57   | 270.53       | SALO    |
| 2017196        | 12:32 | 0.41       | 121.98      | 113.00           | 45.62        | 10.52         | 104.58   | 317.55  | 74.08        | SALO    |
| 2017283        | 06:52 | -18.57     | -69.75      | 85.00            | 45.62        | 10.52         | 96.49    | 44.12   | 250.22       | SALO    |
| 2016211        | 21:38 | 18.54      | 145.51      | 196.00           | 46.36        | 7.30          | 105.18   | 331.43  | 40.93        | SENIN   |
| 2016217        | 16:44 | 24.94      | 142.01      | 510.00           | 46.36        | 7.30          | 98.03    | 330.20  | 40.66        | SENIN   |
| 2017181        | 22:49 | -0.28      | -80.49      | 13.00            | 46.36        | 7.30          | 88.67    | 43.80   | 268.21       | SENIN   |
| 2015150        | 11:43 | 27.84      | 140.49      | 664.00           | 46.24        | 8.02          | 94.62    | 329.09  | 40.94        | SIMPL   |
| 2015171        | 02:30 | -36.36     | -73.81      | 11.00            | 46.24        | 8.02          | 110.20   | 47.06   | 238.36       | SIMPL   |
| 2015259        | 08:00 | 1.88       | 126.43      | 41.00            | 46.24        | 8.02          | 107.85   | 320.11  | 67.45        | SIMPL   |
| 2016207        | 17:46 | -26.11     | -70.51      | 72.00            | 46.24        | 8.02          | 101.01   | 43.87   | 243.86       | SIMPL   |
| 2016232        | 07:52 | -55.29     | -31.88      | 10.00            | 46.24        | 8.02          | 106.61   | 27.68   | 202.51       | SIMPL   |
| 2017130        | 23:43 | -56.41     | -25.74      | 15.00            | 46.24        | 8.02          | 106.13   | 23.67   | 198.76       | SIMPL   |
| 2016207        | 17:46 | -26.11     | -70.51      | 72.00            | 46.21        | 7.60          | 100.74   | 43.76   | 243.57       | VANNI   |
| 2016329        | 19:03 | 11.91      | -88.90      | 10.00            | 46.21        | 7.60          | 85.95    | 43.77   | 282.86       | VANNI   |
| 2016159        | 11:11 | 18.36      | -105.17     | 10.00            | 45.87        | 8.77          | 92.60    | 39.74   | 299.67       | VARE    |
| 2018250        | 02:32 | -2.35      | -78.90      | 93.00            | 45.87        | 8.77          | 90.04    | 44.28   | 266.70       | VARE    |
| 2016232        | 07:52 | -55.29     | -31.88      | 10.00            | 45.76        | 10.12         | 106.75   | 29.28   | 203.56       | ZONE    |
| 2018100        | 10:39 | -31.03     | -71.53      | 66.00            | 45.76        | 10.12         | 106.20   | 46.16   | 242.18       | ZONE    |
| 2018250        | 02:32 | -2.35      | -78.90      | 93.00            | 45.76        | 10.12         | 90.98    | 44.43   | 267.66       | ZONE    |
| 2015161        | 14:12 | -22.40     | -68.43      | 124.00           | 47.37        | 8.58          | 97.85    | 41.96   | 245.54       | ZUR     |
| 2016201        | 05:38 | -30.25     | -71.97      | 8.00             | 47.37        | 8.58          | 105.73   | 44.15   | 242.47       | ZUR     |
| 2016207        | 17:46 | -26.11     | -70.51      | 72.00            | 47.37        | 8.58          | 101.85   | 43.00   | 244.44       | ZUR     |
| 2017049        | 12:30 | -23.86     | -66.66      | 222.00           | 47.37        | 8.58          | 97.84    | 41.57   | 243.34       | ZUR     |
| 2017105        | 08:39 | -23.27     | -67.72      | 155.00           | 47.37        | 8.58          | 98.05    | 41.83   | 244.47       | ZUR     |
| 2018092        | 14:00 | -20.66     | -63.01      | 559.00           | 47.37        | 8.58          | 93.22    | 40.24   | 242.87       | ZUR     |



Table 3 Supplementary Material - Average values for phi and dt from two different computation methods

| Sta   | lat   | lon  | stacked surface phi | phi error | stacked surface dt | dt error | angular mean phi | phi error | average dt | dt standard deviation |
|-------|-------|------|---------------------|-----------|--------------------|----------|------------------|-----------|------------|-----------------------|
| A015A | 48.93 | 14.9 | -87.0               | 2.00      | 0.90               | 0.025    | 88.38            | 00.78     | 1.18       | 0.46                  |
| A032A | 48.12 | 13.3 | 85.00               | 3.50      | 1.27               | 0.050    | 86.00            | 01.00     | 1.31       | 0.28                  |
| A033A | 47.48 | 13.1 | 83.00               | 1.75      | 0.80               | 0.037    | -82.93           | 00.35     | 0.94       | 0.39                  |
| A034A | 46.91 | 13.0 | 89.00               | 2.00      | 1.97               | 0.068    | 89.67            | 00.99     | 1.88       | 0.44                  |
| A035A | 47.20 | 12.7 | 81.00               | 2.25      | 1.35               | 0.075    | 68.85            | 00.75     | 1.26       | 0.43                  |
| A036A | 47.38 | 12.3 | 75.00               | 1.25      | 1.32               | 0.062    | 69.50            | 00.74     | 1.39       | 0.51                  |
| A037A | 47.07 | 10.2 | 36.00               | 1.25      | 1.05               | 0.025    | 55.33            | 00.73     | 1.27       | 0.47                  |
| A038A | 47.46 | 11.9 | 67.00               | 1.75      | 1.05               | 0.075    | 63.29            | 00.85     | 1.50       | 0.53                  |
| A060A | 47.03 | 7.89 | 51.00               | 4.00      | 1.52               | 0.125    | 44.00            | 01.00     | 1.77       | 0.35                  |
| A061A | 47.10 | 8.93 | 51.00               | 1.00      | 1.40               | 0.025    | 52.41            | 00.93     | 1.62       | 0.48                  |
| A062A | 46.18 | 9.11 | 65.00               | 3.75      | 1.07               | 0.062    | 63.33            | 00.96     | 1.65       | 0.60                  |
| A100A | 48.45 | 8.93 | 53.00               | 10.7      | 1.00               | 0.212    | 39.68            | 00.64     | 1.08       | 0.22                  |
| A101B | 48.12 | 8.55 | 44.00               | 6.25      | 0.52               | 0.056    | 19.99            | 00.68     | 0.88       | 0.35                  |
| A102A | 48.14 | 9.20 | 17.00               | 4.50      | 0.77               | 0.081    | 14.51            | 00.88     | 0.95       | 0.38                  |
| A103D | 47.80 | 9.55 | 54.00               | 4.25      | 1.60               | 0.081    | 45.99            | 00.97     | 1.63       | 0.09                  |
| A108A | 48.35 | 9.83 | 68.00               | 1.75      | 2.72               | 0.193    | 62.58            | 00.96     | 1.93       | 0.50                  |
| A109A | 48.44 | 9.46 | 64.00               | 1.75      | 1.55               | 0.125    | 62.82            | 00.64     | 1.11       | 0.34                  |
| A111A | 49.85 | 10.2 | 79.00               | 2.00      | 0.97               | 0.031    | 80.62            | 00.93     | 1.10       | 0.42                  |
| A112A | 49.65 | 7.91 | 66.00               | 1.50      | 1.80               | 0.043    | 71.95            | 00.91     | 1.63       | 0.27                  |
| A113A | 49.55 | 8.73 | 64.00               | 1.50      | 1.40               | 0.056    | 49.81            | 00.61     | 1.33       | 0.21                  |
| A114A | 49.59 | 9.18 | 52.00               | 0.75      | 1.37               | 0.025    | 55.25            | 00.99     | 1.42       | 0.33                  |
| A115A | 49.27 | 9.05 | 60.00               | 1.00      | 1.85               | 0.031    | 55.35            | 00.97     | 1.70       | 0.12                  |
| A116A | 49.40 | 9.48 | 57.00               | 1.50      | 1.50               | 0.081    | 51.33            | 00.82     | 1.41       | 0.62                  |
| A117A | 49.04 | 9.57 | 64.00               | 1.75      | 1.37               | 0.037    | 58.05            | 00.87     | 1.48       | 0.41                  |
| A126A | 48.99 | 8.49 | 36.00               | 17.7      | 1.62               | 0.837    | 35.00            | 01.00     | 1.60       | 0.00                  |
| A140A | 47.55 | 11.4 | 56.00               | 3.00      | 0.50               | 0.043    | 58.38            | 00.57     | 1.19       | 0.52                  |
| A141A | 47.75 | 11.8 | 73.00               | 1.75      | 0.97               | 0.031    | 65.47            | 00.75     | 1.33       | 0.38                  |
| A143A | 47.68 | 11.0 | 57.00               | 0.75      | 1.15               | 0.025    | 58.29            | 00.78     | 1.30       | 0.41                  |
| A144A | 48.10 | 12.0 | 14.00               | 16.0      | 0.42               | 0.168    | 73.37            | 00.44     | 1.61       | 0.58                  |
| A145A | 47.87 | 12.4 | 67.00               | 2.75      | 1.10               | 0.125    | 68.45            | 00.90     | 1.41       | 0.59                  |
| A151A | 48.88 | 6.38 | -32.0               | 5.25      | 1.62               | 0.325    | -33.00           | 01.00     | 1.60       | 0.00                  |
| A157A | 48.00 | 5.73 | -24.0               | 4.25      | 1.92               | 0.581    | -25.00           | 01.00     | 1.90       | 0.00                  |
| A158A | 48.01 | 6.35 | -88.0               | 1.75      | 0.90               | 0.100    | 88.18            | 00.61     | 1.24       | 0.44                  |
| A160A | 47.69 | 5.05 | 73.00               | 6.00      | 2.12               | 0.281    | 85.50            | 00.80     | 2.37       | 0.52                  |
| A163A | 47.20 | 5.20 | -2.00               | 9.75      | 0.72               | 0.168    | -5.50            | 00.99     | 0.79       | 0.11                  |
| A173A | 46.33 | 6.68 | -3.00               | 2.50      | 1.00               | 0.043    | 07.31            | 00.72     | 1.46       | 0.48                  |
| A210A | 48.83 | 5.92 | 77.00               | 1.75      | 0.85               | 0.025    | 82.08            | 00.56     | 1.07       | 0.52                  |
| A211A | 48.41 | 6.62 | 72.00               | 2.25      | 1.00               | 0.075    | 76.10            | 00.93     | 1.29       | 0.47                  |
| A213A | 47.50 | 5.48 | 48.00               | 6.50      | 0.65               | 0.137    | -88.06           | 00.76     | 1.33       | 0.36                  |
| A214A | 46.36 | 5.80 | -1.00               | 7.75      | 0.45               | 0.037    | 22.88            | 00.48     | 1.23       | 0.51                  |

| Sta   | lat   | lon   | stacked surface phi | phi error | stacked surface dt | dt error | angular mean phi | phi error | average dt | dt standard deviation |
|-------|-------|-------|---------------------|-----------|--------------------|----------|------------------|-----------|------------|-----------------------|
| A282A | 45.25 | 7.61  | 50.00               | 4.50      | 1.37               | 0.112    | 43.41            | 00.75     | 1.36       | 0.19                  |
| A283A | 45.23 | 8.32  | 22.00               | 15.0      | 1.8                | 0.50     | 21.00            | 01.00     | 1.80       | 0.00                  |
| A284A | 45.14 | 9.38  | 39.00               | 1.00      | 0.90               | 0.093    | 28.65            | 00.61     | 1.56       | 0.69                  |
| A286A | 45.37 | 8.83  | 12.00               | 7.25      | 0.80               | 0.081    | 21.50            | 00.87     | 0.81       | 0.04                  |
| A287A | 45.62 | 8.36  | 48.00               | 5.00      | 0.80               | 0.168    | 60.02            | 00.98     | 0.78       | 0.39                  |
| A288A | 46.01 | 8.48  | 57.00               | 2.75      | 0.97               | 0.062    | 80.82            | 00.63     | 1.95       | 0.55                  |
| A289A | 46.05 | 9.76  | 67.00               | 2.25      | 1.20               | 0.068    | 77.83            | 00.75     | 1.40       | 0.59                  |
| A290A | 46.51 | 10.9  | 55.00               | 2.25      | 1.72               | 0.068    | 51.48            | 00.87     | 1.71       | 0.44                  |
| A300A | 45.82 | 13.1  | 68.00               | 0.75      | 1.12               | 0.012    | 55.50            | 00.80     | 0.94       | 0.25                  |
| A301A | 45.62 | 12.6  | 29.00               | 5.50      | 0.85               | 0.062    | 32.15            | 00.77     | 1.17       | 0.49                  |
| A302A | 45.63 | 11.9  | 56.00               | 1.00      | 1.32               | 0.050    | 44.71            | 00.85     | 1.58       | 0.56                  |
| A303A | 45.34 | 12.3  | 48.00               | 4.00      | 0.57               | 0.062    | 46.24            | 00.35     | 0.86       | 0.27                  |
| A312A | 45.11 | 10.4  | 72.00               | 4.25      | 1.47               | 0.331    | 42.50            | 00.52     | 1.24       | 0.32                  |
| A313A | 45.31 | 10.6  | -60.0               | 9.25      | 0.30               | 0.093    | 75.91            | 00.55     | 1.08       | 0.31                  |
| A360A | 48.73 | 10.3  | 67.00               | 1.50      | 1.15               | 0.031    | 71.32            | 00.87     | 1.28       | 0.18                  |
| A362A | 48.36 | 10.4  | 54.00               | 3.25      | 1.07               | 0.068    | 43.04            | 00.97     | 1.27       | 0.34                  |
| A363A | 48.52 | 10.9  | 73.00               | 1.25      | 1.27               | 0.050    | 78.65            | 00.79     | 0.98       | 0.35                  |
| A364A | 48.50 | 11.4  | 67.00               | 2.50      | 0.82               | 0.087    | 63.00            | 00.99     | 0.79       | 0.01                  |
| A365A | 48.17 | 10.7  | 50.00               | 2.75      | 1.27               | 0.056    | 32.43            | 00.72     | 1.21       | 0.32                  |
| A366A | 47.83 | 10.6  | 57.00               | 1.25      | 1.27               | 0.062    | 59.82            | 00.68     | 1.40       | 0.28                  |
| A367A | 48.31 | 11.9  | 73.00               | 1.00      | 1.52               | 0.050    | 74.25            | 00.99     | 1.48       | 0.28                  |
| A368A | 49.13 | 10.5  | 53.00               | 3.00      | 0.80               | 0.037    | 56.08            | 00.90     | 1.15       | 0.23                  |
| A369A | 49.12 | 11.0  | 74.00               | 0.75      | 0.90               | 0.037    | 75.09            | 00.90     | 1.46       | 0.27                  |
| ABSI  | 46.73 | 11.32 | 62.00               | 1.25      | 1.92               | 0.050    | 54.44            | 00.93     | 1.62       | 0.35                  |
| ACB   | 47.59 | 8.25  | 46.00               | 8.75      | 1.82               | 0.162    | 42.01            | 00.99     | 2.02       | 0.44                  |
| BERGE | 47.87 | 8.18  | 54.00               | 1.25      | 1.45               | 0.043    | 46.24            | 00.62     | 1.52       | 0.47                  |
| BFO   | 48.33 | 8.33  | 71.00               | 1.50      | 1.17               | 0.043    | 46.98            | 00.86     | 1.32       | 0.44                  |
| BNALP | 46.87 | 8.43  | 51.00               | 1.00      | 1.50               | 0.025    | 50.14            | 00.95     | 1.69       | 0.41                  |
| BOSI  | 46.50 | 11.32 | 68.00               | 1.50      | 1.27               | 0.050    | 60.50            | 00.93     | 1.36       | 0.04                  |
| BRMO  | 46.48 | 10.37 | 57.00               | 2.50      | 0.90               | 0.168    | 60.01            | 00.97     | 1.25       | 0.38                  |
| CIEL  | 48.83 | 7.36  | 73.00               | 2.25      | 1.10               | 0.050    | 60.11            | 00.79     | 1.48       | 0.49                  |
| DAGMA | 47.23 | 8.01  | 62.00               | 0.75      | 1.45               | 0.037    | 56.75            | 00.91     | 1.46       | 0.23                  |
| EMING | 47.90 | 8.85  | 66.00               | 1.00      | 1.35               | 0.037    | 52.56            | 00.74     | 1.67       | 0.51                  |
| EMMET | 47.44 | 8.01  | 47.00               | 1.50      | 1.57               | 0.050    | 48.05            | 00.97     | 1.38       | 0.16                  |
| FIESA | 46.44 | 8.11  | 41.00               | 2.00      | 1.20               | 0.043    | 43.58            | 00.91     | 1.64       | 0.31                  |
| FUORN | 46.62 | 10.2  | 56.00               | 1.50      | 1.07               | 0.043    | 68.14            | 00.84     | 1.12       | 0.49                  |
| GRA1  | 49.69 | 11.22 | 84.00               | 1.00      | 1.30               | 0.056    | 87.42            | 00.80     | 1.56       | 0.39                  |
| GRA2  | 49.66 | 11.36 | -83.0               | 3.25      | 0.70               | 0.037    | -89.36           | 00.87     | 1.26       | 0.48                  |
| GRA3  | 49.76 | 11.32 | 84.00               | 1.00      | 1.52               | 0.100    | -89.68           | 00.85     | 1.54       | 0.60                  |
| GRA4  | 49.57 | 11.44 | 82.00               | 1.50      | 0.87               | 0.050    | -87.81           | 00.73     | 1.65       | 0.60                  |
| GRIMS | 46.58 | 8.32  | 46.00               | 1.00      | 1.72               | 0.018    | 50.08            | 00.96     | 1.75       | 0.32                  |

| Sta   | lat   | lon   | stacked surface phi | phi error | stacked surface dt | dt error | angular mean phi | phi error | average dt | dt standard deviation |
|-------|-------|-------|---------------------|-----------|--------------------|----------|------------------|-----------|------------|-----------------------|
| KOSI  | 46.46 | 11.38 | 69.00               | 2.25      | 1.55               | 0.106    | 55.08            | 00.91     | 1.67       | 0.26                  |
| LKBD2 | 46.37 | 7.64  | 13.00               | 1.25      | 1.62               | 0.056    | 26.53            | 00.86     | 1.72       | 0.37                  |
| LUSI  | 45.96 | 10.94 | 61.00               | 1.75      | 1.20               | 0.031    | 68.31            | 00.82     | 1.56       | 0.43                  |
| MDI   | 45.77 | 9.72  | 76.00               | 3.00      | 1.30               | 0.137    | 66.34            | 00.94     | 1.37       | 0.54                  |
| METMA | 47.71 | 8.25  | 53.00               | 0.75      | 1.62               | 0.037    | 47.25            | 00.92     | 1.70       | 0.54                  |
| MILB  | 49.83 | 9.29  | 71.00               | 1.00      | 1.17               | 0.037    | 52.33            | 00.78     | 1.23       | 0.50                  |
| MOSI  | 46.62 | 10.55 | 59.00               | 1.50      | 1.35               | 0.062    | 59.23            | 00.89     | 1.42       | 0.31                  |
| MTI02 | 47.38 | 7.17  | 76.00               | 5.00      | 1.82               | 0.118    | 75.00            | 01.00     | 1.80       | 0.00                  |
| NALPS | 46.60 | 8.75  | 51.00               | 1.25      | 1.52               | 0.012    | 47.22            | 00.98     | 1.53       | 0.40                  |
| OG35  | 46.04 | 5.57  | -21.0               | 3.75      | 0.55               | 0.093    | 16.55            | 00.19     | 1.49       | 0.66                  |
| OGMY  | 45.88 | 5.89  | -23.0               | 1.75      | 0.95               | 0.062    | -84.18           | 00.33     | 1.29       | 0.62                  |
| OGSM  | 45.61 | 5.70  | -34.0               | 1.25      | 0.95               | 0.037    | -20.60           | 00.49     | 1.06       | 0.36                  |
| OPPE  | 45.31 | 11.17 | 74.00               | 1.75      | 1.22               | 0.062    | 42.57            | 00.60     | 1.32       | 0.18                  |
| PANIX | 46.83 | 9.11  | 47.00               | 1.50      | 1.42               | 0.018    | 49.06            | 00.94     | 1.40       | 0.23                  |
| RIVEL | 46.76 | 5.92  | 20.00               | 12.5      | 0.42               | 0.143    | 10.59            | 00.73     | 1.57       | 0.78                  |
| ROSI  | 46.93 | 11.41 | 73.00               | 1.75      | 1.50               | 0.081    | 63.19            | 00.91     | 1.79       | 0.44                  |
| SAIRA | 47.30 | 7.09  | 52.00               | 2.50      | 0.85               | 0.050    | 51.43            | 00.84     | 1.15       | 0.41                  |
| SALO  | 45.62 | 10.52 | 73.00               | 3.75      | 1.00               | 0.050    | 55.70            | 00.70     | 1.34       | 0.38                  |
| SENIN | 46.36 | 7.30  | 29.00               | 3.50      | 0.95               | 0.062    | 19.68            | 00.86     | 1.49       | 0.39                  |
| SIMPL | 46.24 | 8.02  | 54.00               | 2.25      | 1.02               | 0.037    | 36.01            | 00.82     | 1.11       | 0.40                  |
| TMO22 | 49.22 | 8.18  | 68.00               | 7.25      | 3.50               | 0.843    | 64.00            | 01.00     | 0.70       | 0.00                  |
| UBR   | 47.68 | 10.11 | 60.00               | 1.25      | 1.50               | 0.031    | 49.37            | 00.80     | 1.70       | 0.46                  |
| VANNI | 46.21 | 7.60  | 18.00               | 2.00      | 1.00               | 0.081    | 29.59            | 00.90     | 1.45       | 0.29                  |
| VARE  | 45.87 | 8.77  | 62.00               | 2.75      | 0.90               | 0.075    | 78.04            | 00.83     | 1.29       | 0.72                  |
| WALHA | 47.75 | 9.12  | 52.00               | 1.50      | 2.02               | 0.037    | 55.23            | 00.94     | 2.06       | 0.34                  |
| WLS   | 48.41 | 7.35  | 81.00               | 1.25      | 1.27               | 0.050    | 68.52            | 00.65     | 1.36       | 0.58                  |
| ZONE  | 45.76 | 10.12 | 76.00               | 2.25      | 0.95               | 0.043    | 63.52            | 00.59     | 1.23       | 0.65                  |
| ZUR   | 47.37 | 8.58  | 62.00               | 1.50      | 1.55               | 0.050    | 51.94            | 00.96     | 1.45       | 0.28                  |
